# Supplementary material for: Brain Expression Genome-Wide Association Study (eGWAS) Identifies Human Disease-Associated Variants
Source: PubMed Central journal article supplement (PMC3369937; doi:10.1371/journal.pgen.1002707), 2012-06-07

rs10843881 vs. ILMN\_2345908

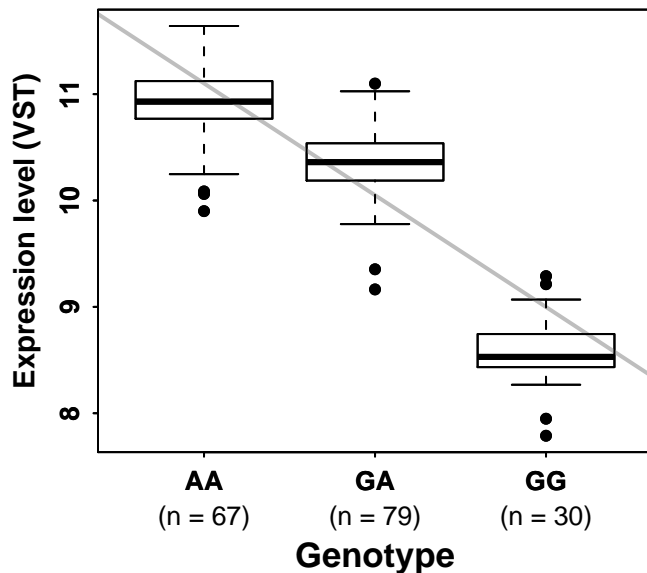

rs3802266 vs. ILMN\_2184966

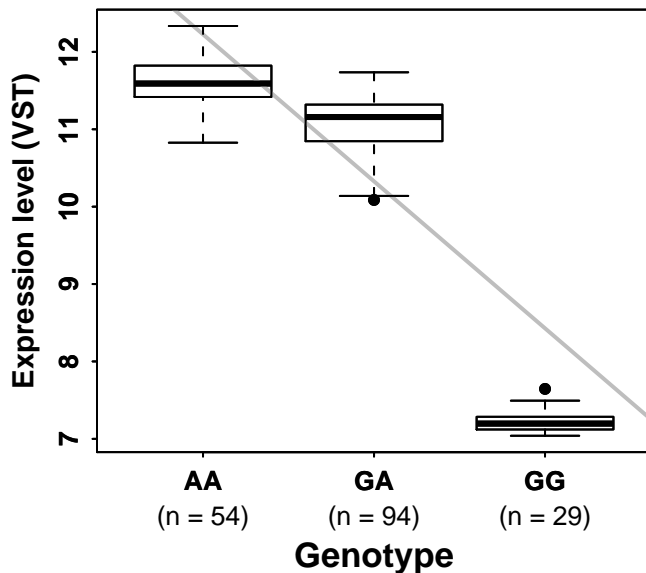

rs12185268 vs. ILMN\_1710903

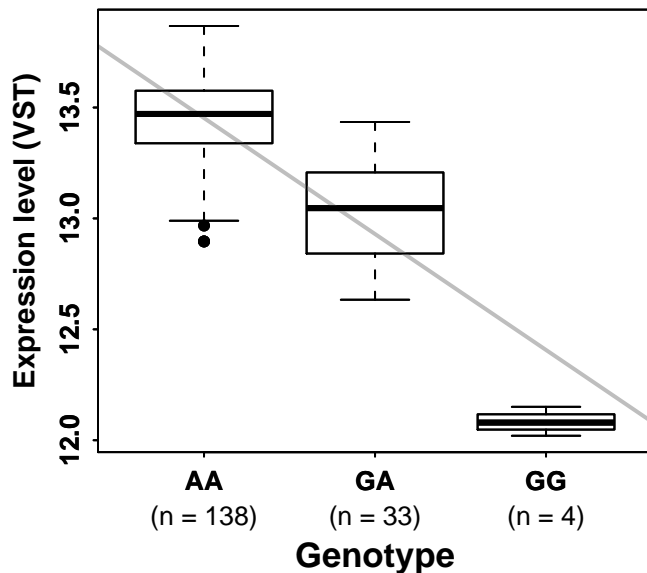

rs907548 vs. ILMN\_1775931

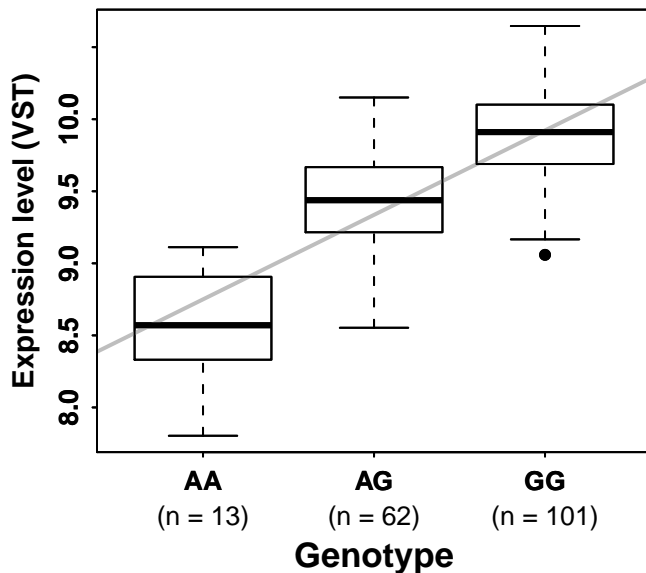

rs5029824 vs. ILMN\_2137066

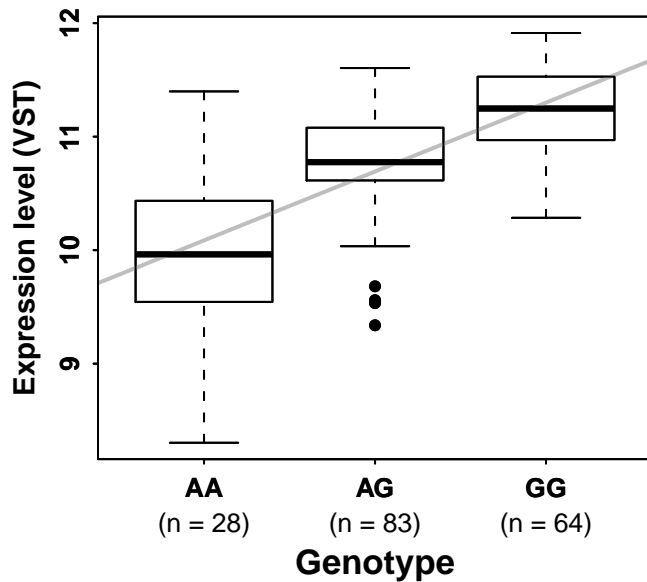

rs1047855 vs. ILMN\_2404850

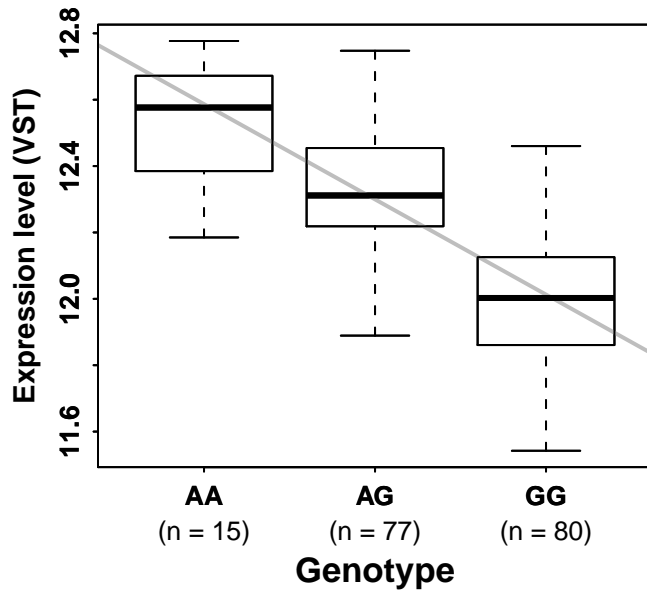

rs6581609 vs. ILMN\_2183938

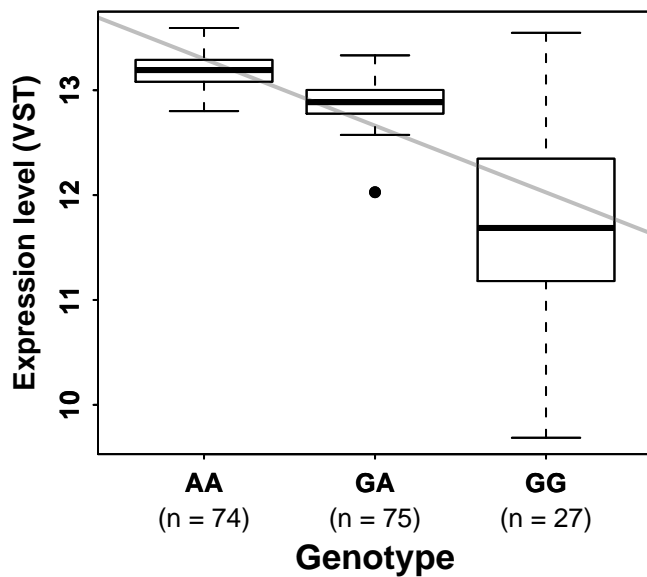

rs7951859 vs. ILMN\_2355738

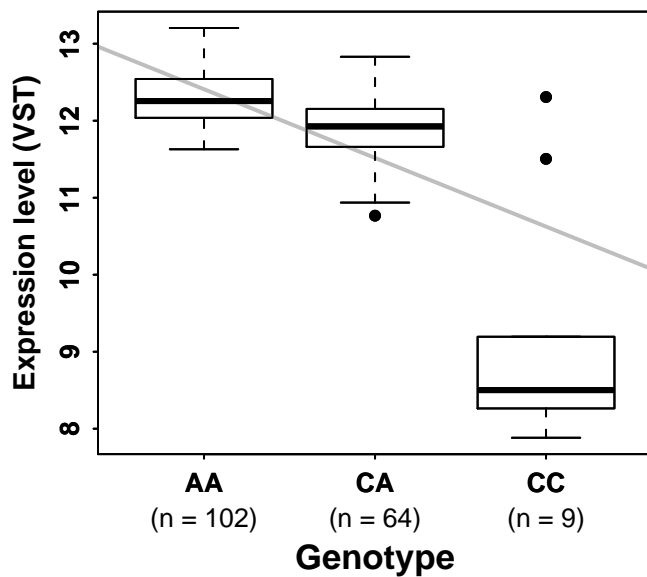

rs2106673 vs. ILMN\_2395932

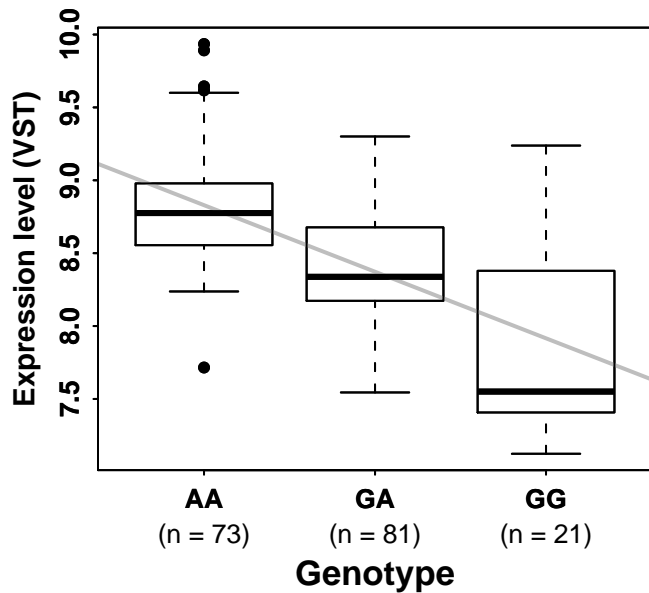

rs11750568 vs. ILMN\_2224946

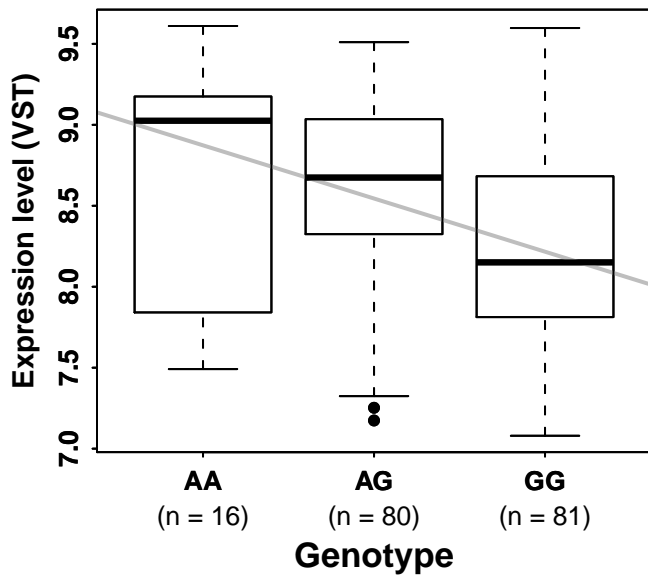

rs2600359 vs. ILMN\_1730477

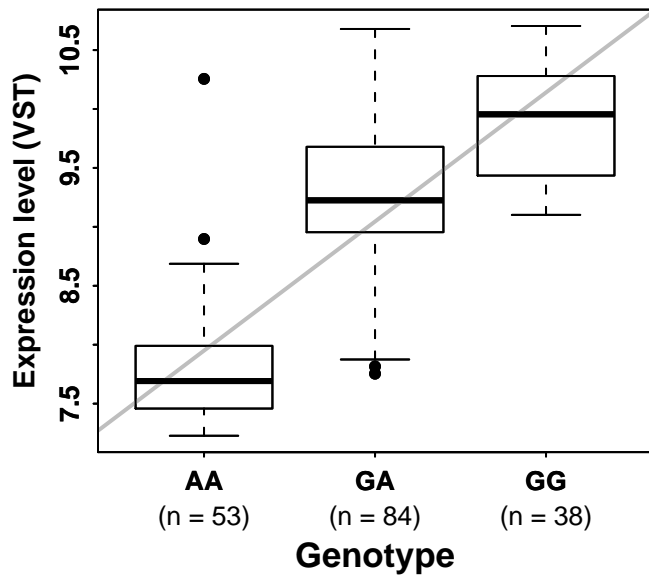

rs7313 vs. ILMN\_2400759

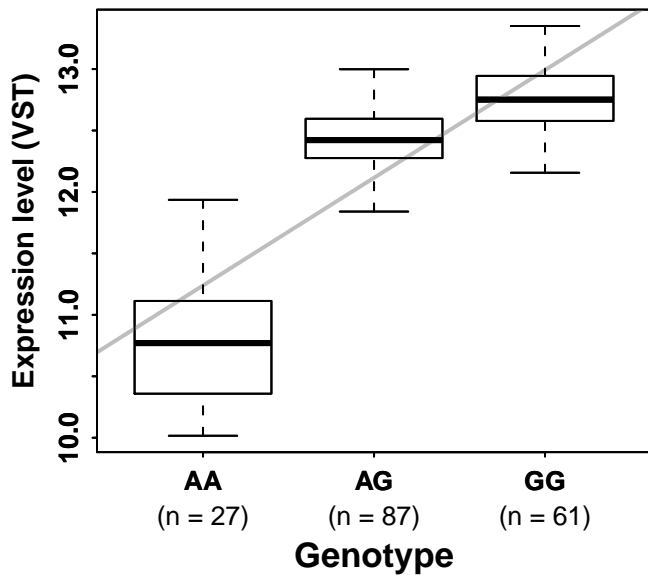

rs2182513 vs. ILMN\_1689177

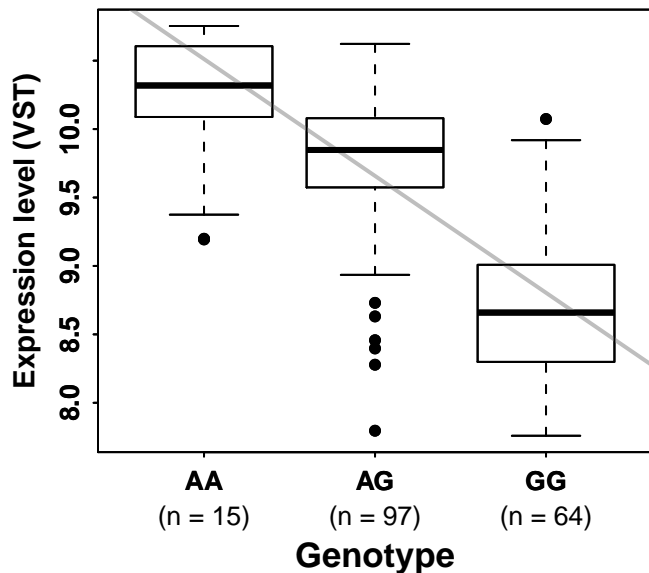

rs136564 vs. ILMN\_1809147

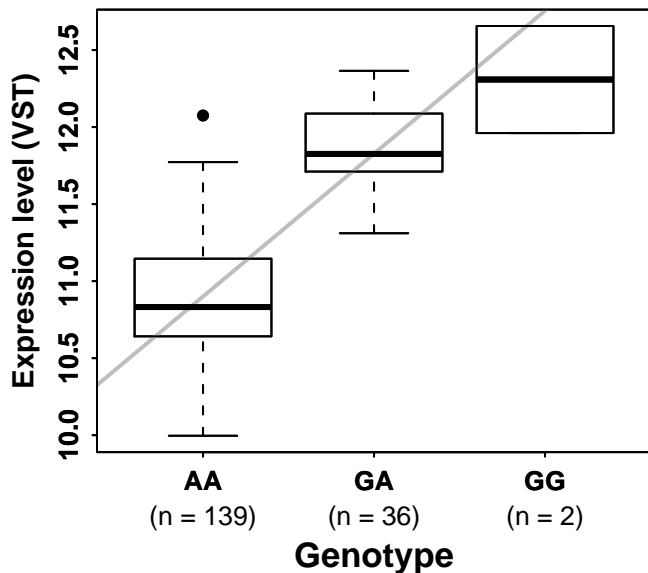

rs3826884 vs. ILMN\_2049417

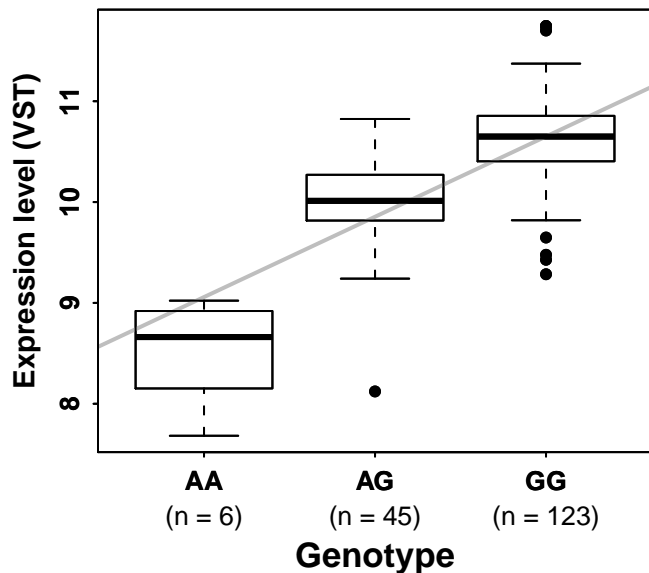

rs1562337 vs. ILMN\_2115862

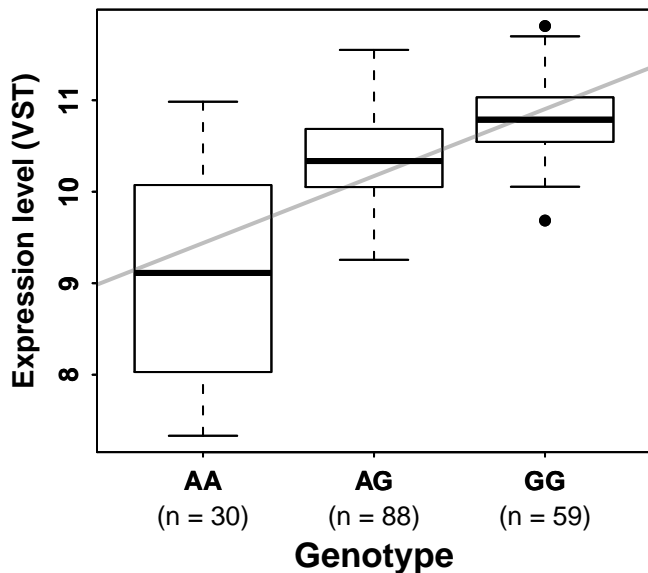

rs2523946 vs. ILMN\_2130441

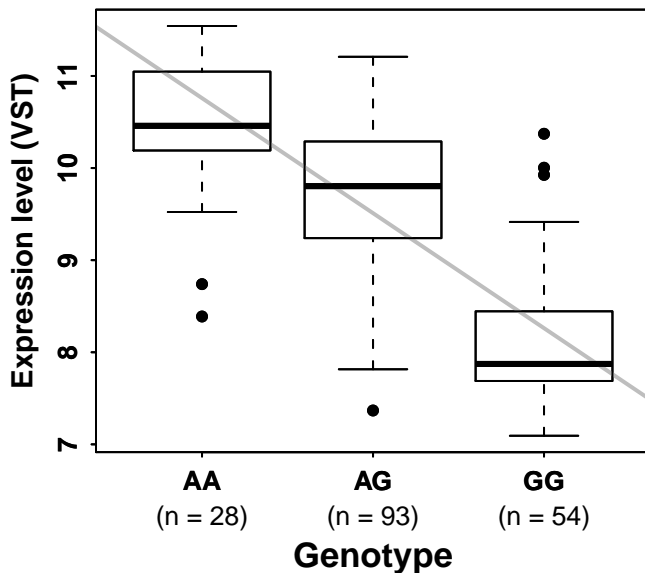

rs184580 vs. ILMN\_1804662

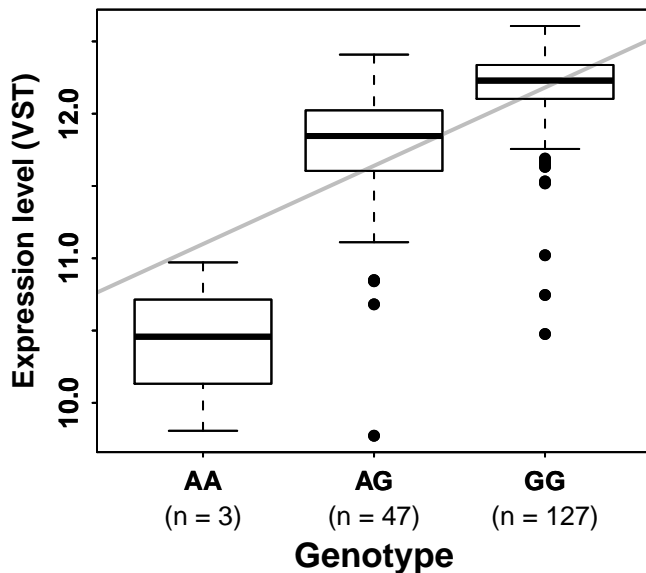

rs9813644 vs. ILMN\_1696151

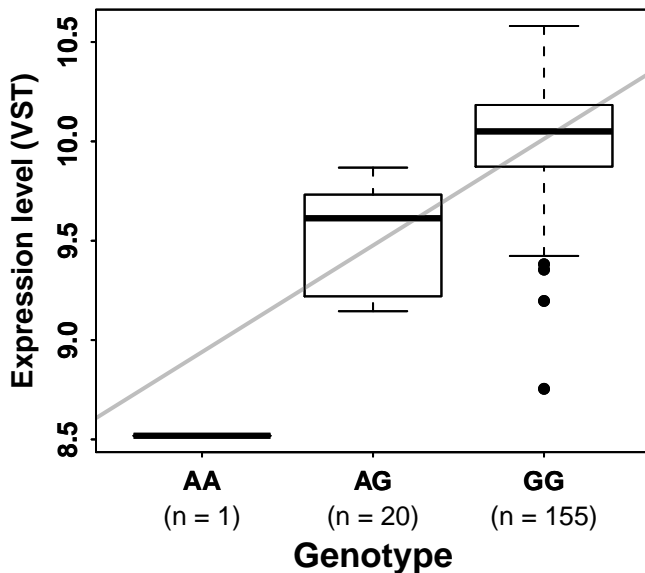

rs868150 vs. ILMN\_2388272

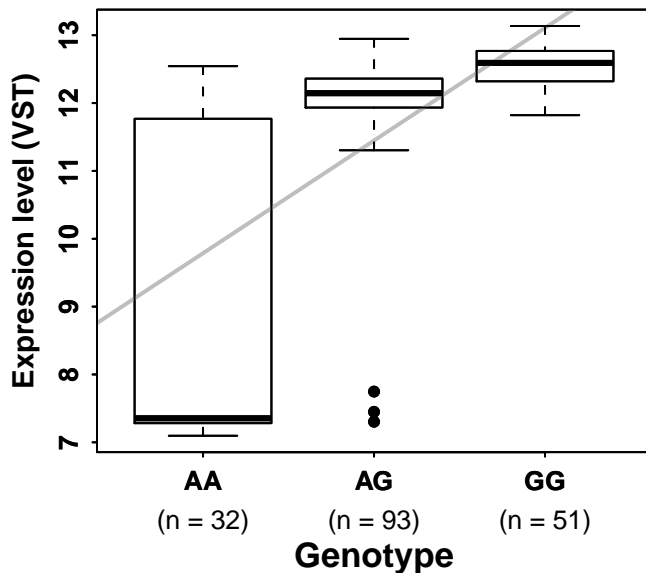

rs2074222 vs. ILMN\_1768595

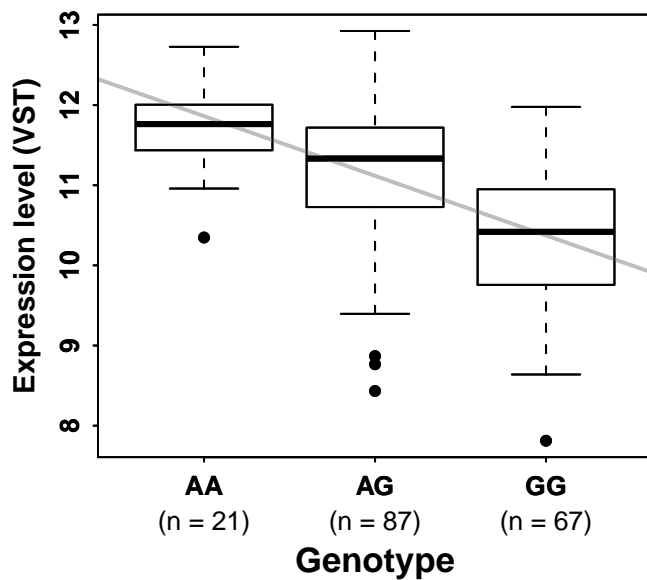

rs11170624 vs. ILMN\_1807798

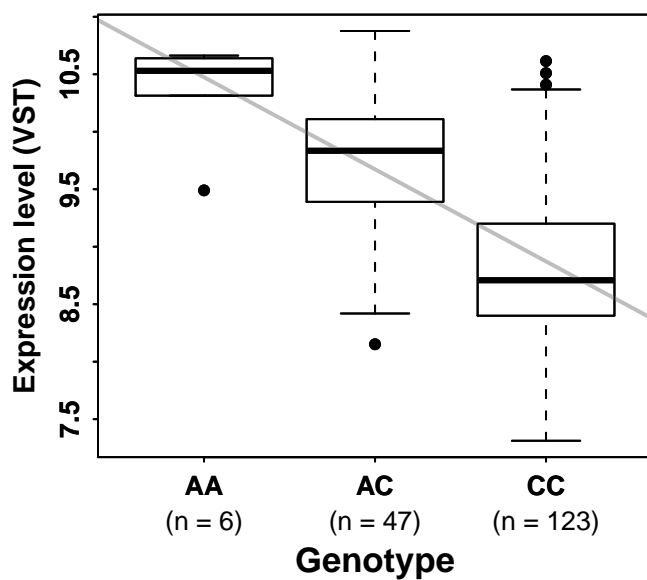

rs11012 vs. ILMN\_2286783

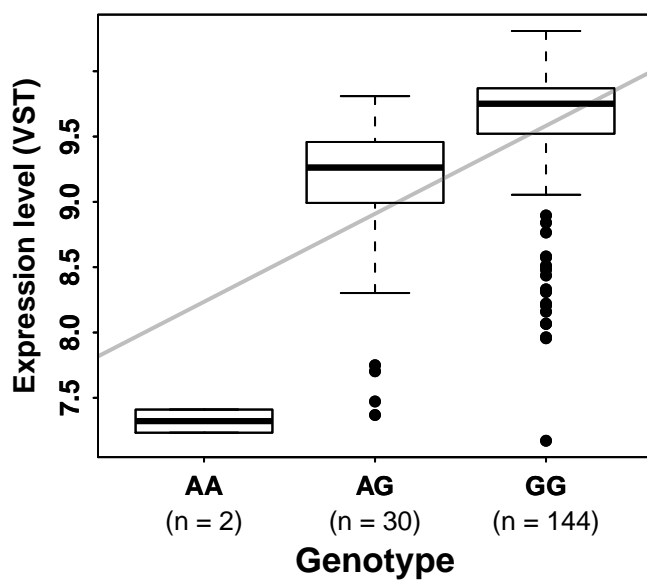

rs1736971 vs. ILMN\_2203729

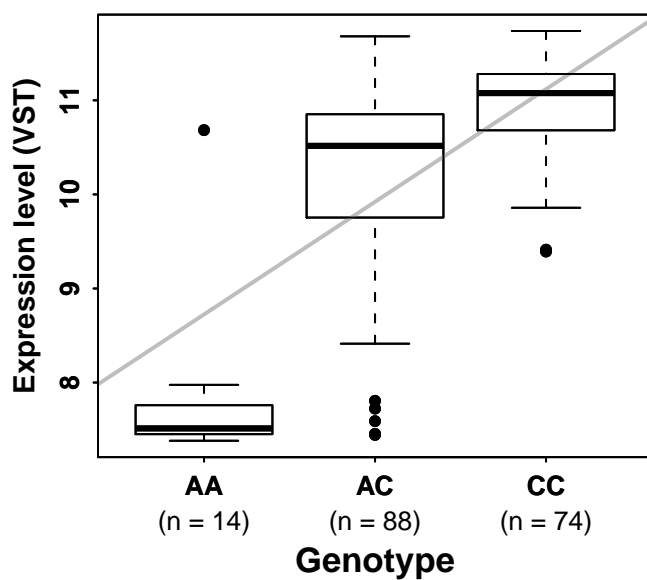

rs3907099 vs. ILMN\_2170595

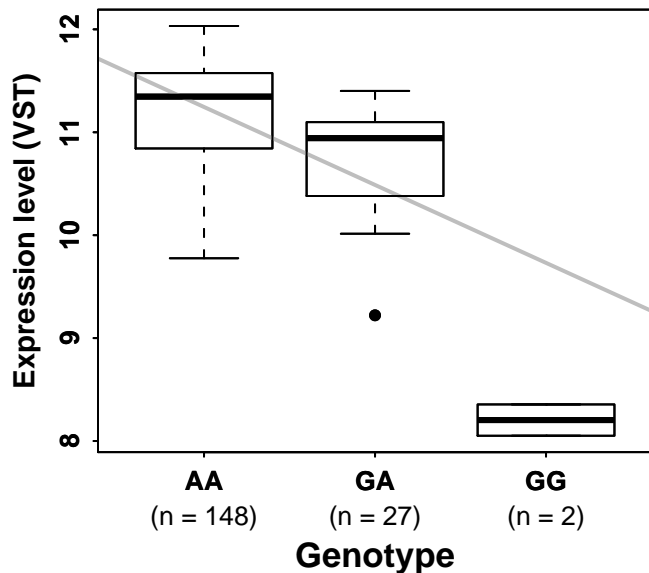

rs4965320 vs. ILMN\_1743142

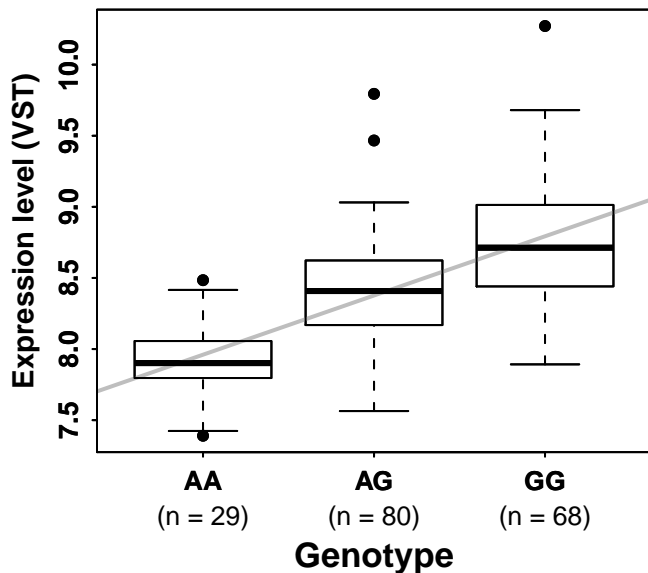

rs9455927 vs. ILMN\_1676679

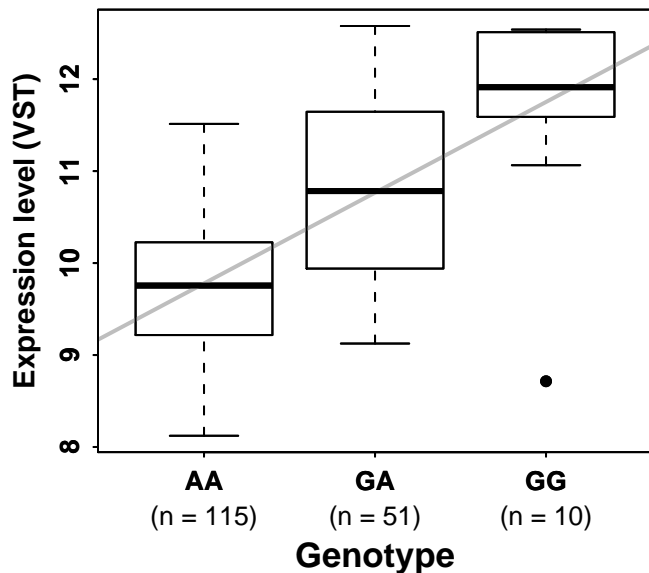

rs393990 vs. ILMN\_1658519

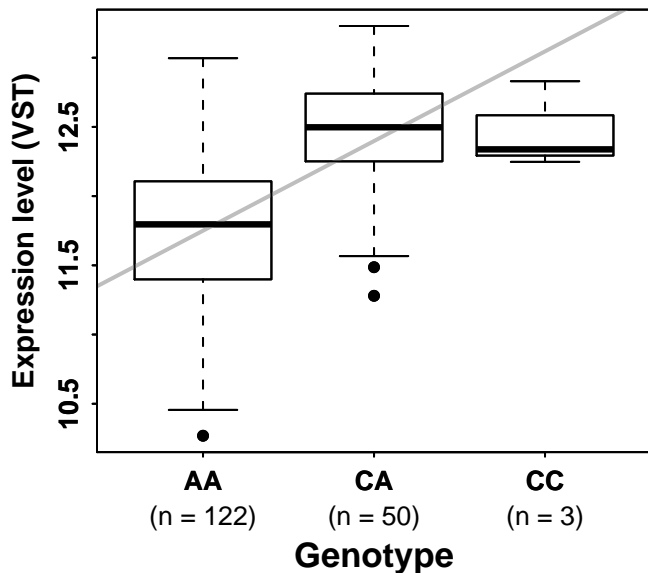

rs1427281 vs. ILMN\_2127098

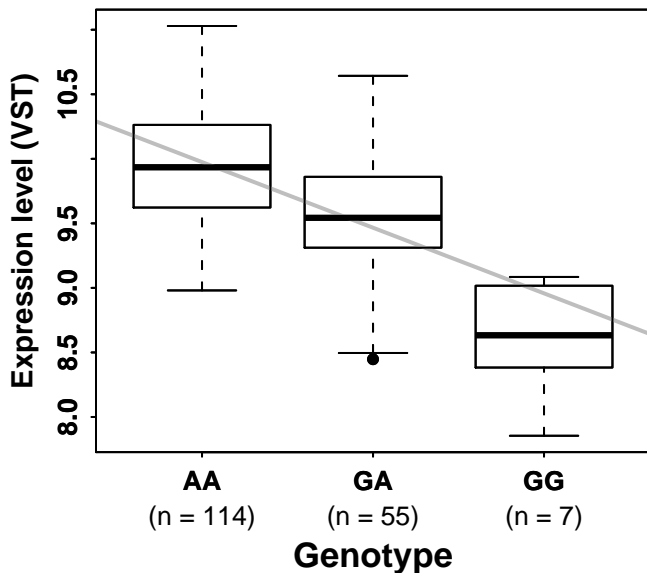

rs3809482 vs. ILMN\_1691772

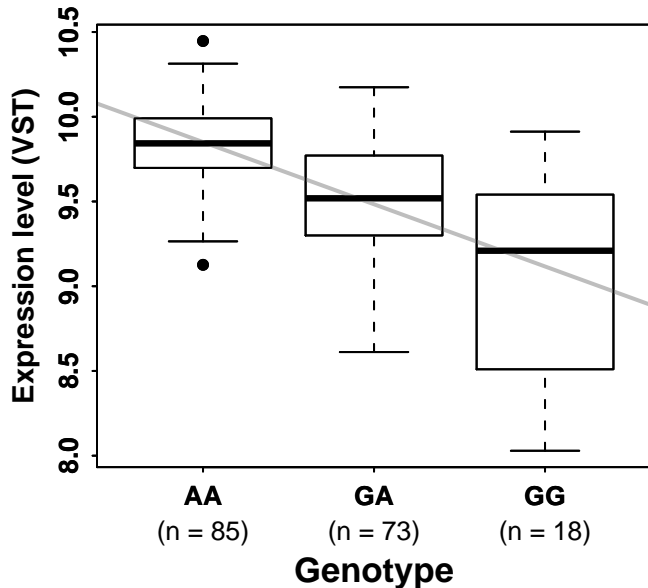

rs4938050 vs. ILMN\_1739214

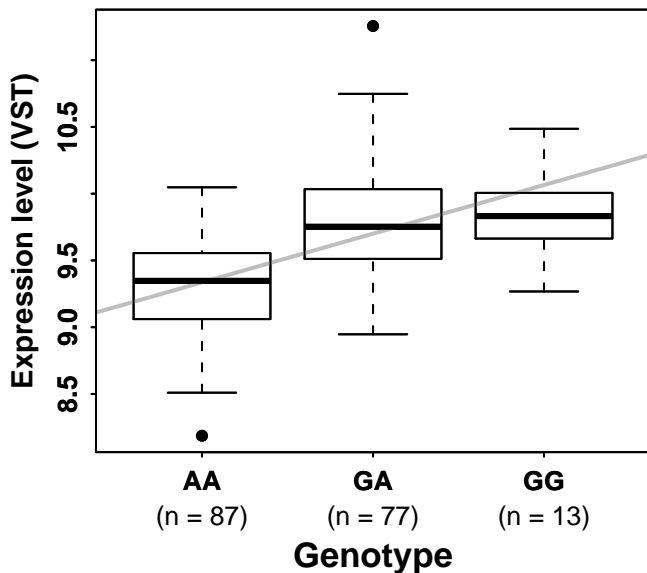

rs2304630 vs. ILMN\_1753164

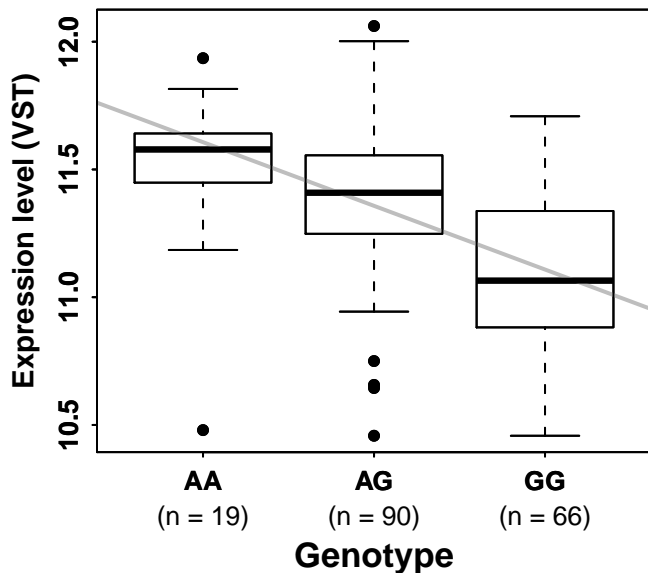



rs2294996 vs. ILMN\_1814247

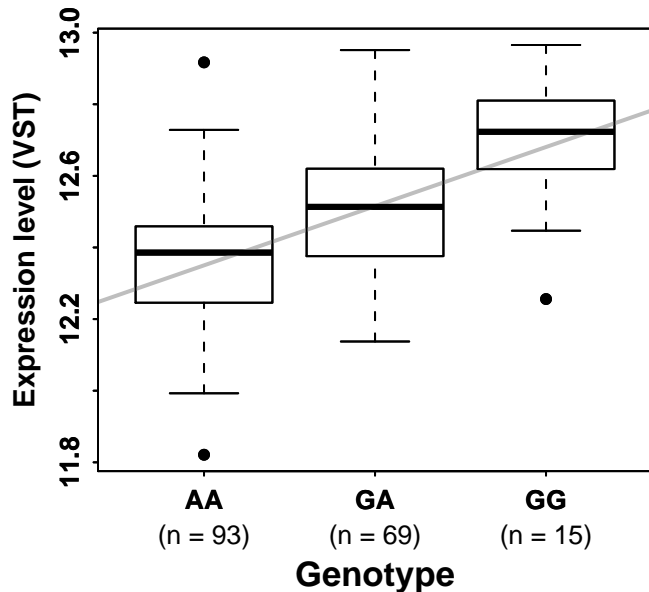

rs773107 vs. ILMN\_2209027

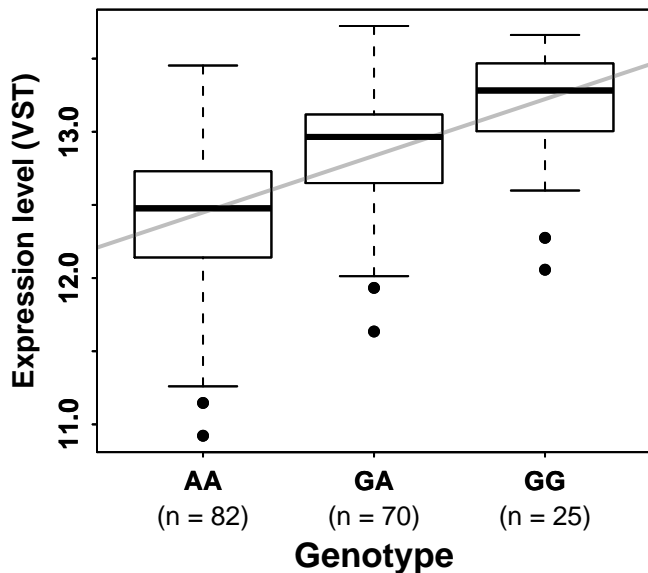

rs2843964 vs. ILMN\_1774949

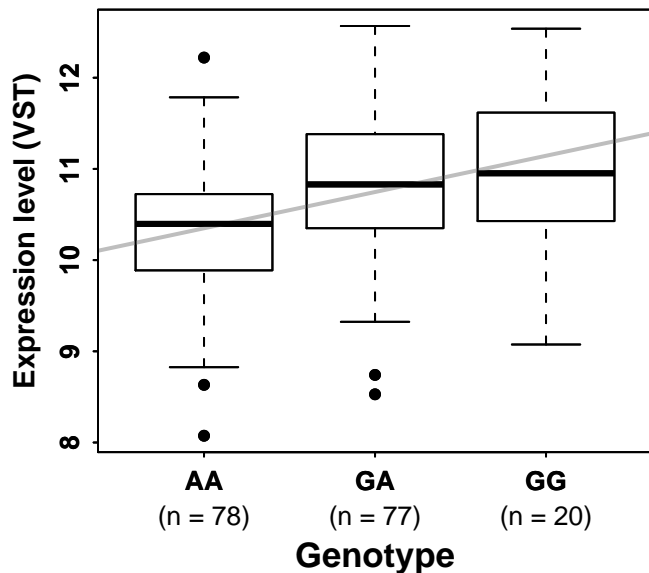

rs4822461 vs. ILMN\_1789418

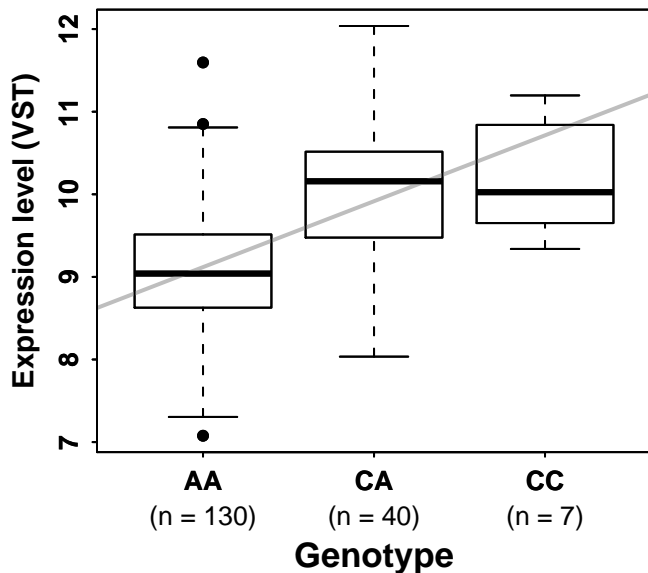

**rs832582 vs. ILMN\_1757636**

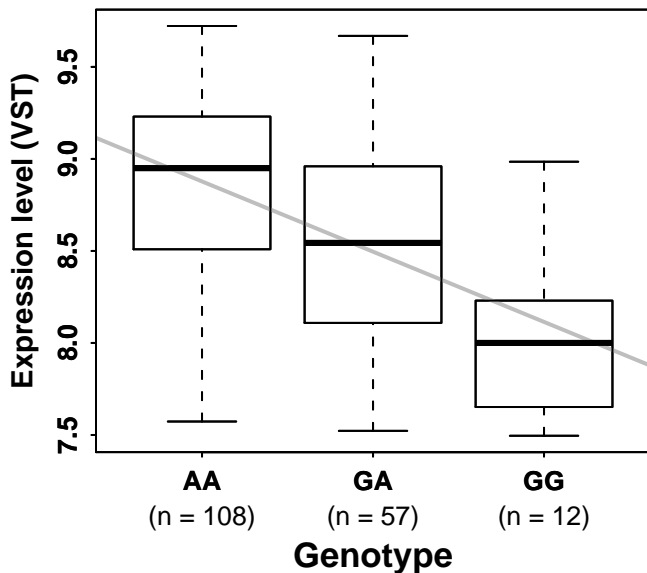

**rs816931 vs. ILMN\_1767801**

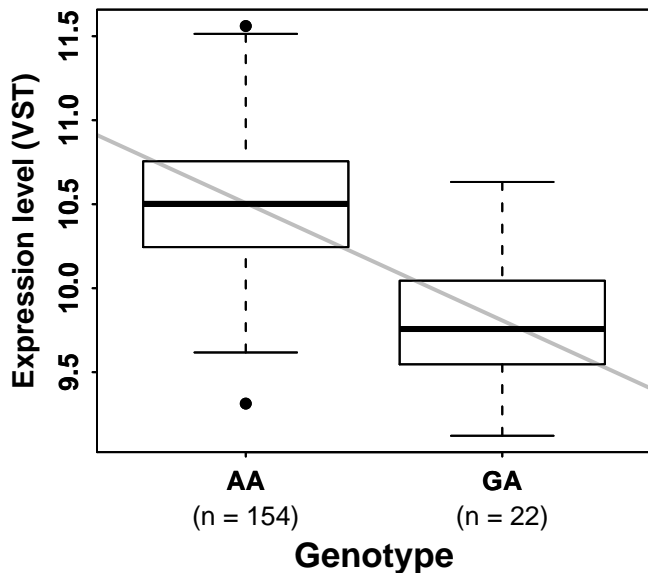

**rs4813547 vs. ILMN\_1680015**

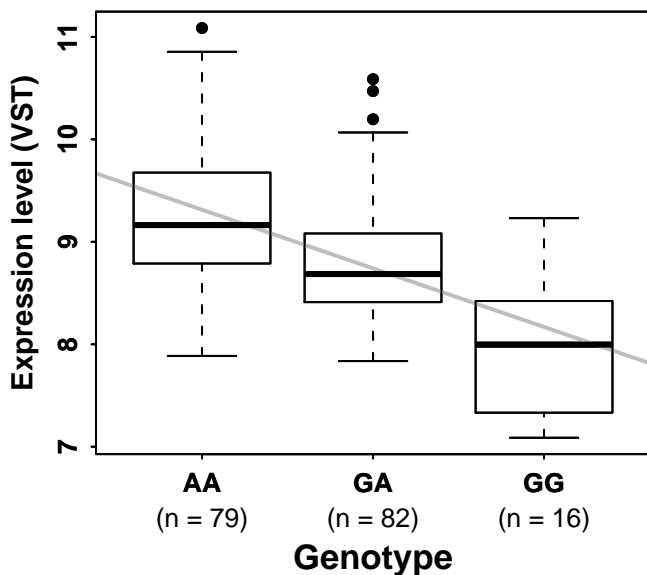

**rs2838808 vs. ILMN\_2376667**

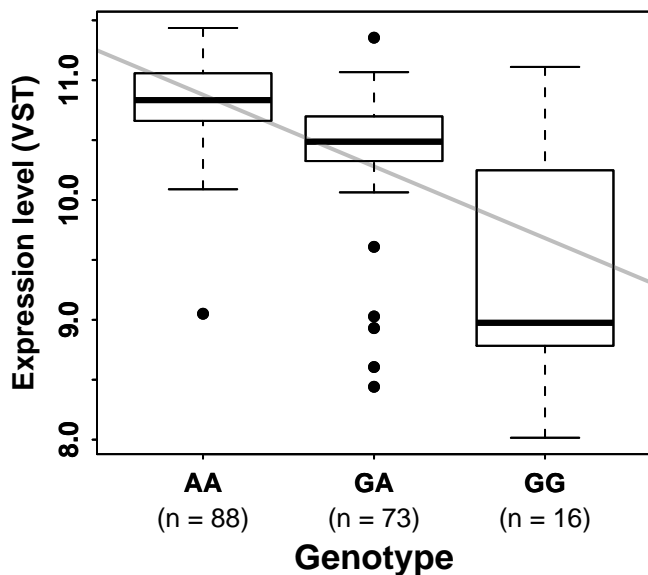

rs10402271 vs. ILMN\_2320280

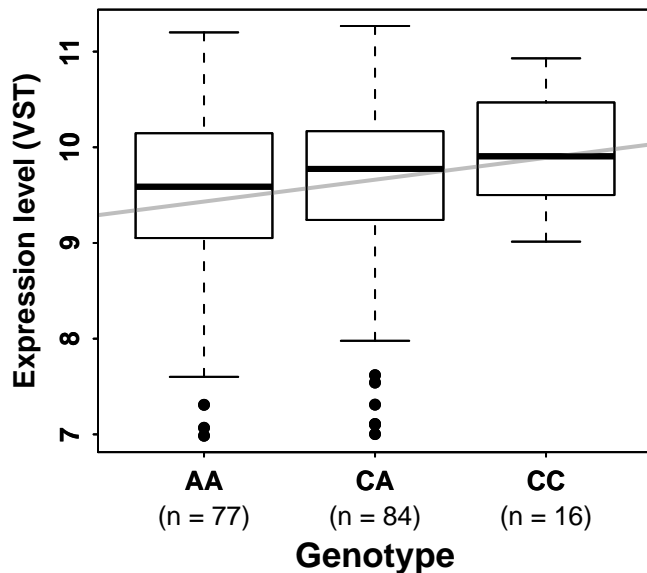

rs10402271 vs. ILMN\_2320280

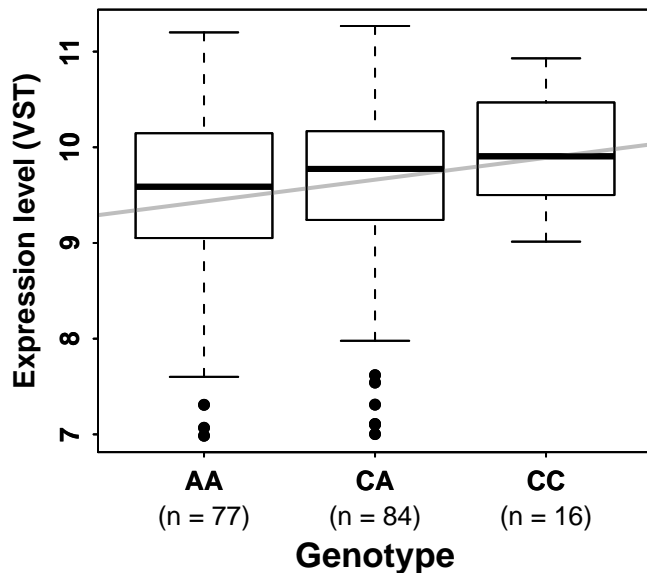

rs10402271 vs. ILMN\_2320280

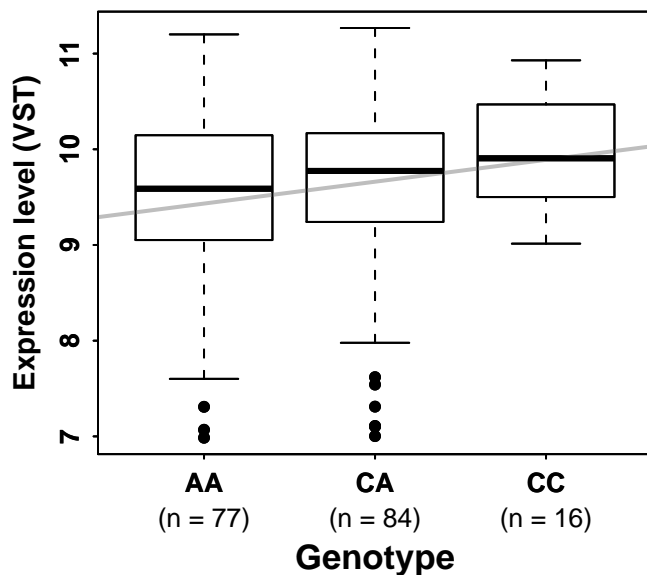

rs10929262 vs. ILMN\_2115862

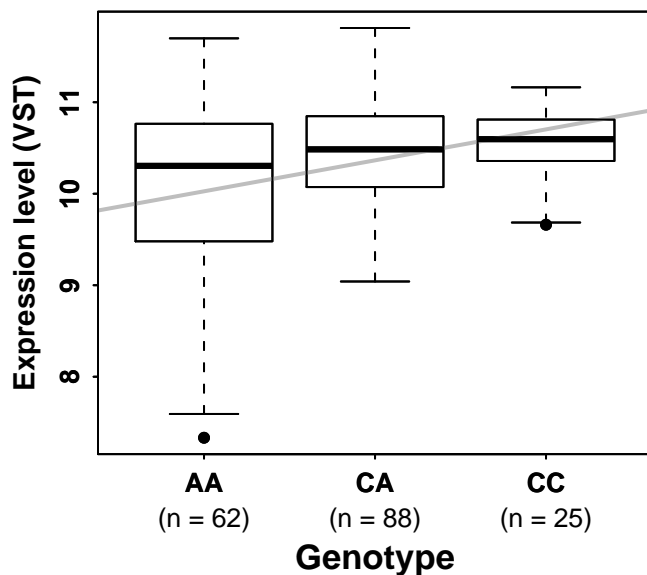

rs11677350 vs. ILMN\_1716041

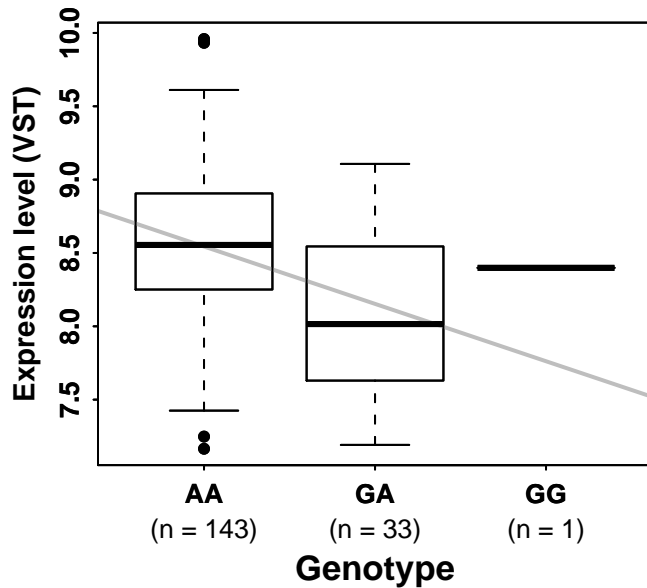

rs12883250 vs. ILMN\_2415572

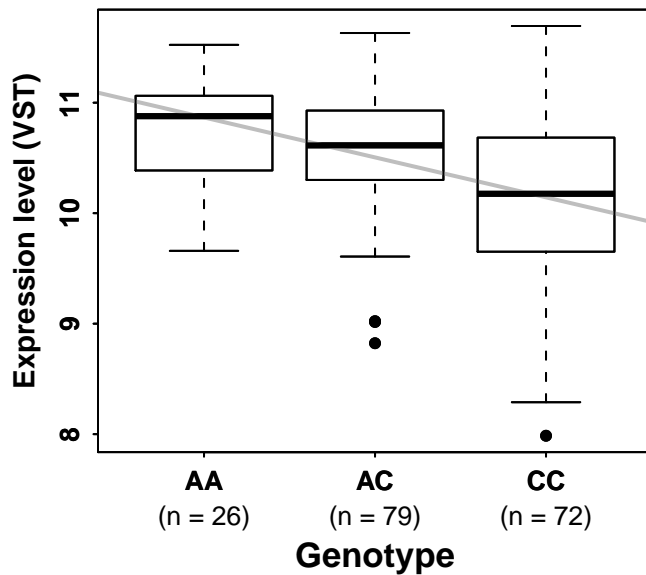

rs2395175 vs. ILMN\_2157441

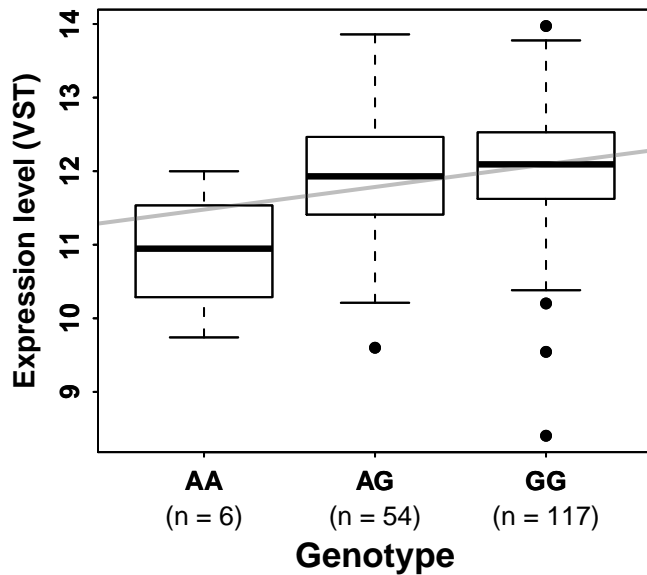

rs2729376 vs. ILMN\_1765332

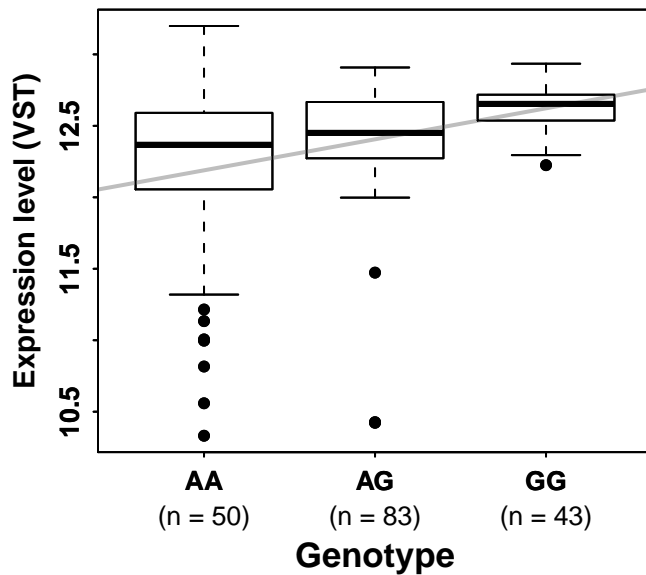

rs3759387 vs. ILMN\_1689156

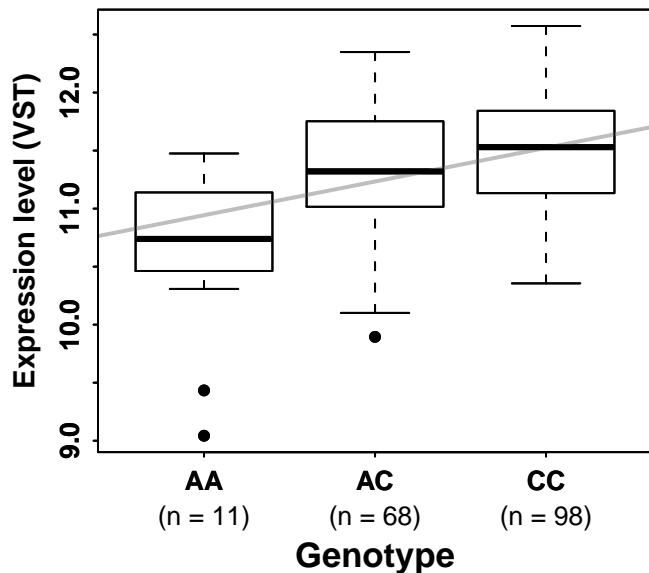

rs3800324 vs. ILMN\_1655748

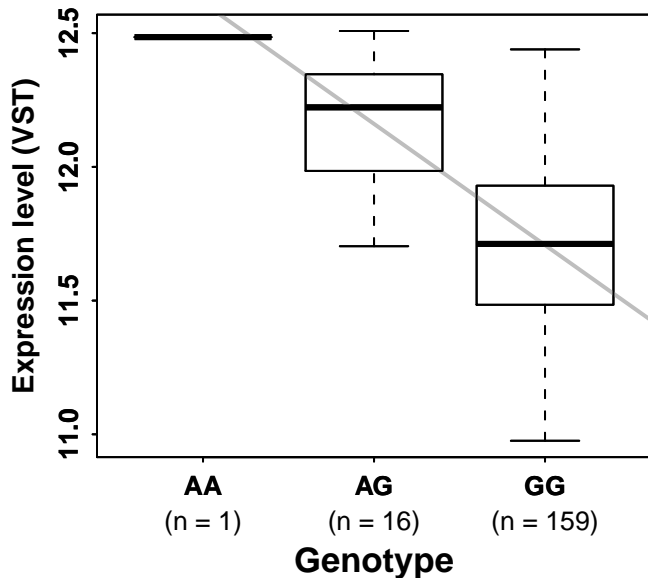

rs3800324 vs. ILMN\_2377991

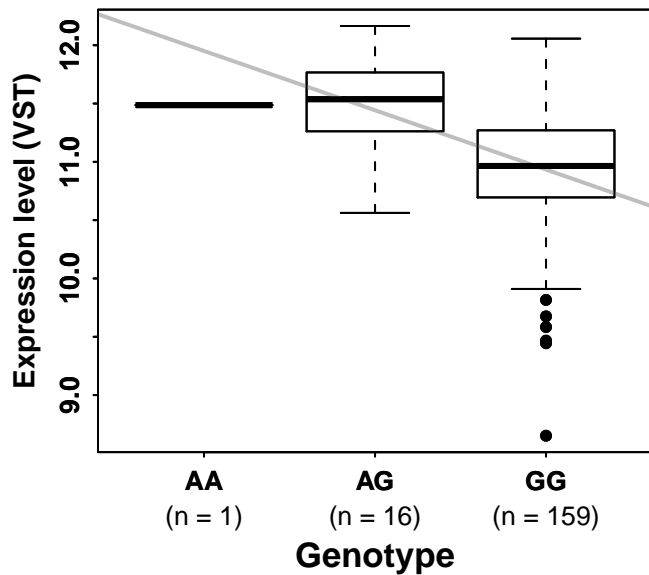

rs3923367 vs. ILMN\_1710315

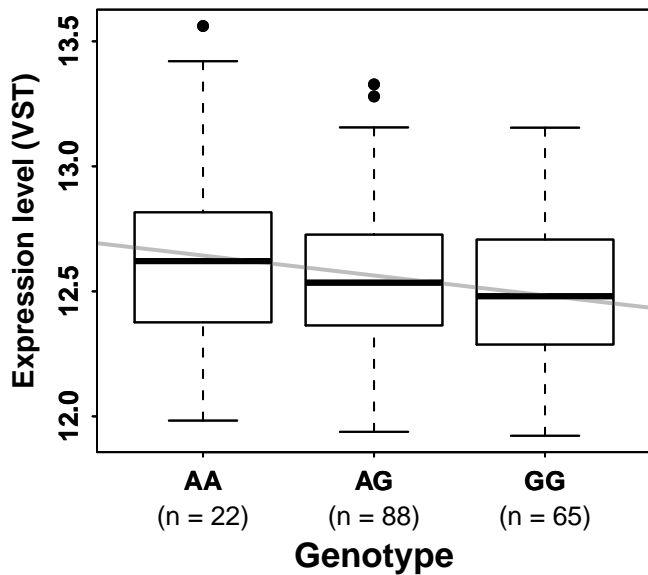

rs6733196 vs. ILMN\_1715203

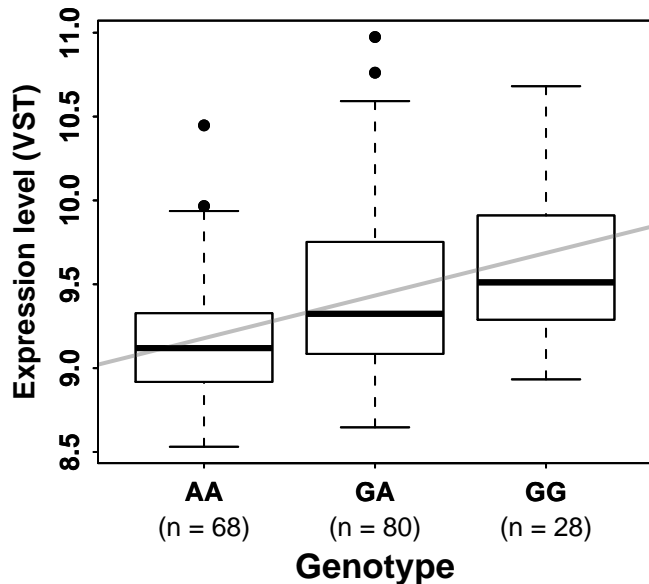

rs7002825 vs. ILMN\_1766770

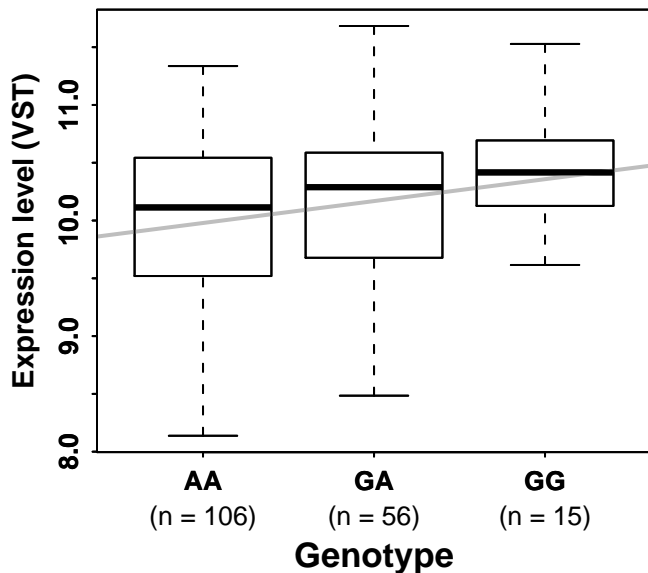

rs7254601 vs. ILMN\_1655637

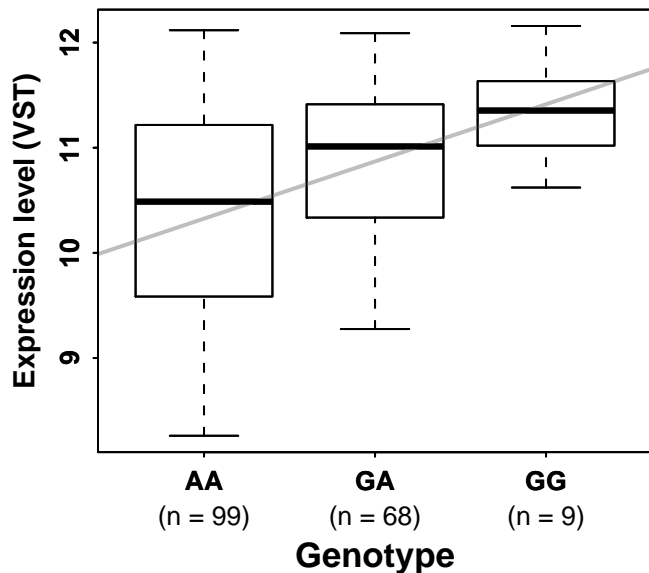

rs7416392 vs. ILMN\_1710315

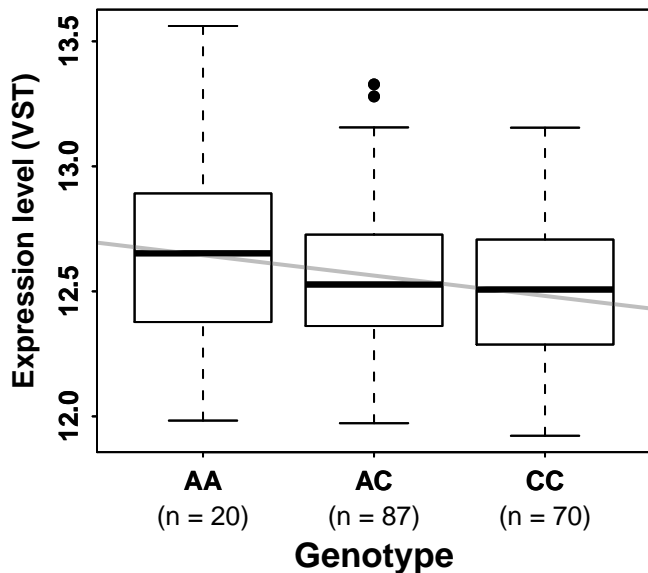

## rs7581626 vs. ILMN\_1715203

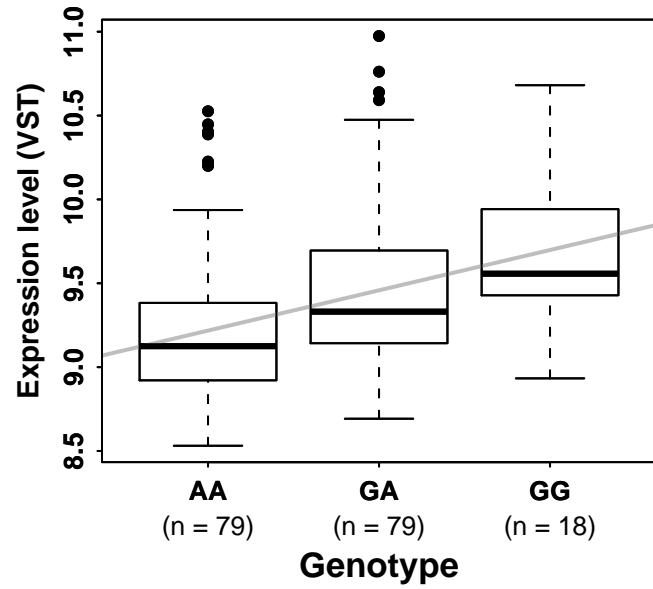

rs10843881 vs. ILMN\_2345908

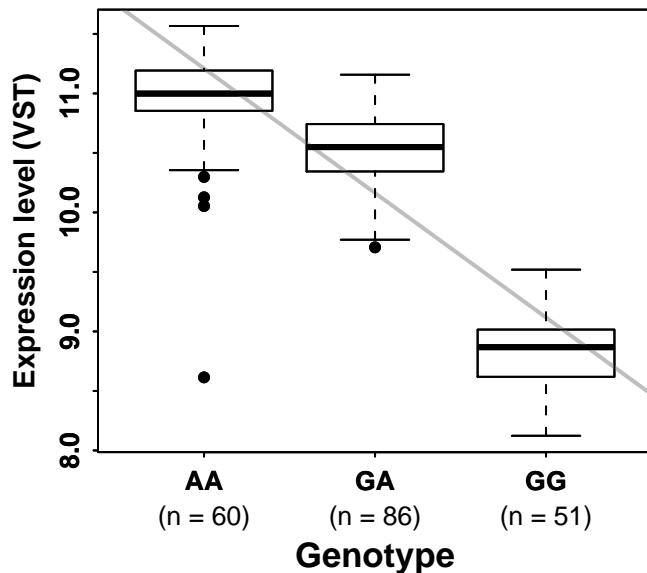

rs3802266 vs. ILMN\_2184966

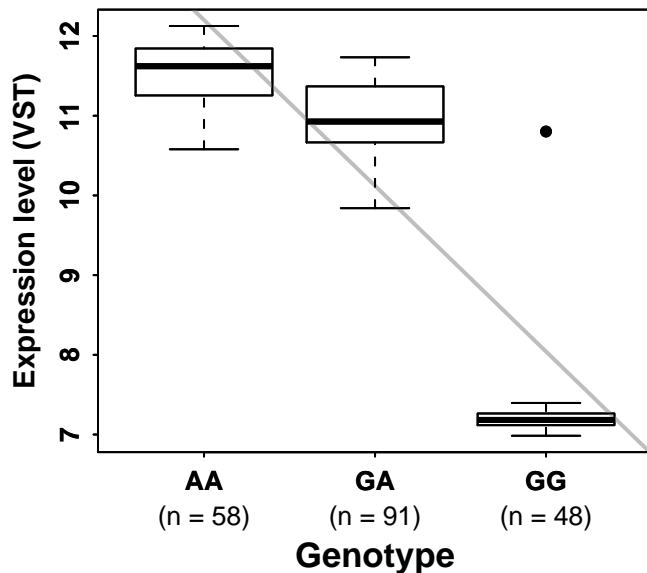

rs12185268 vs. ILMN\_1710903

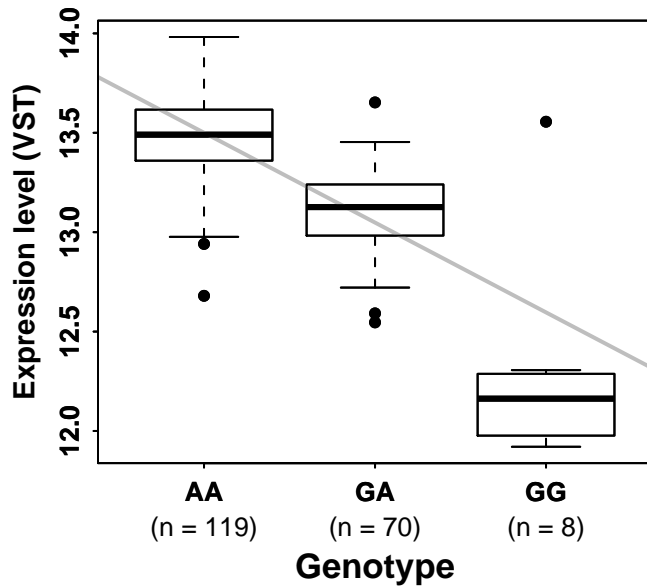

rs907548 vs. ILMN\_1775931

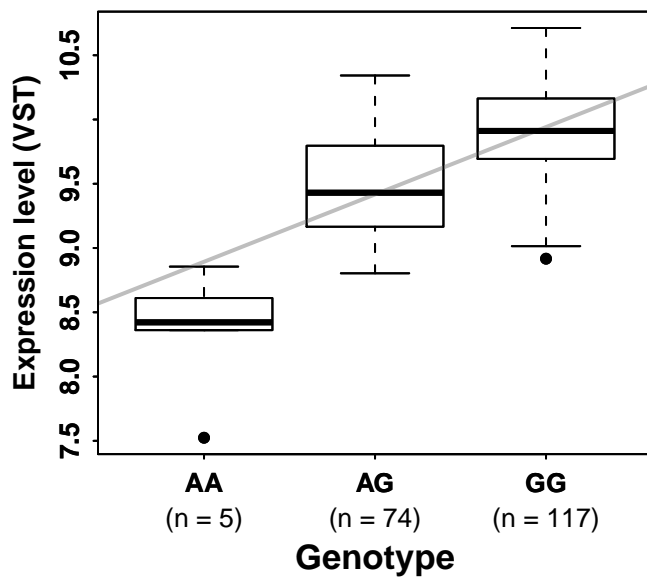



rs5029824 vs. ILMN\_2137066

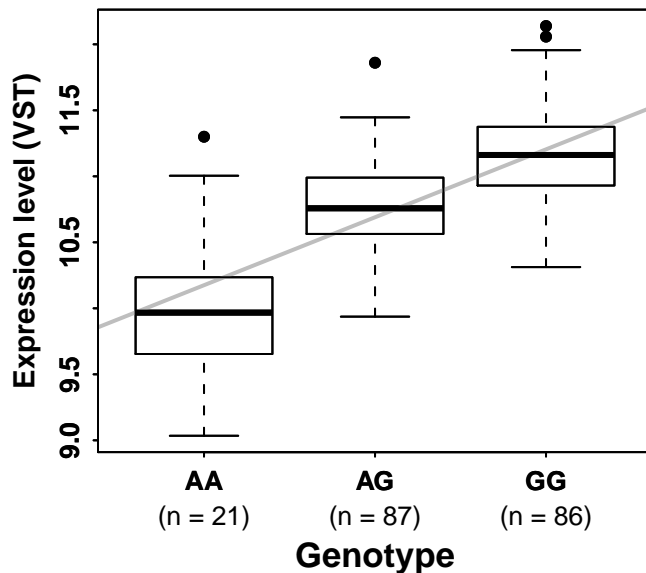

rs1047855 vs. ILMN\_2404850

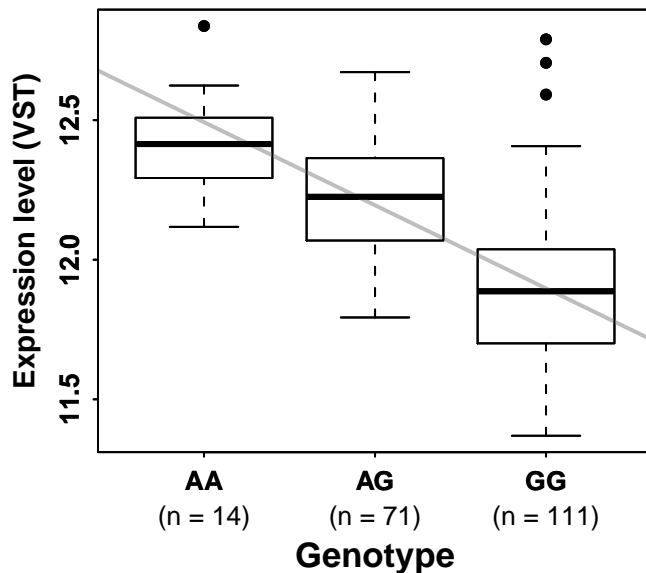

rs6581609 vs. ILMN\_2183938

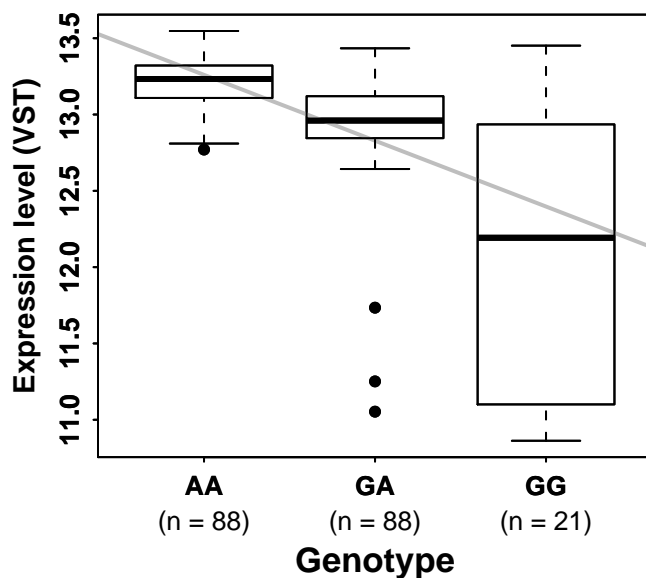

rs7951859 vs. ILMN\_2355738

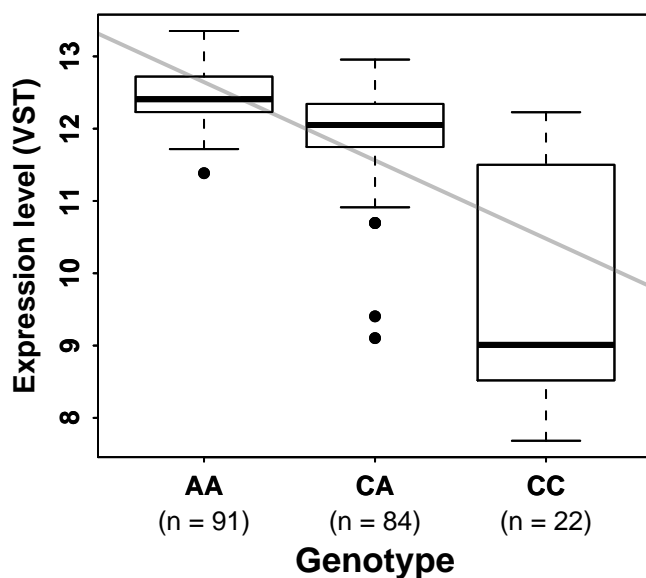

rs2106673 vs. ILMN\_2395932

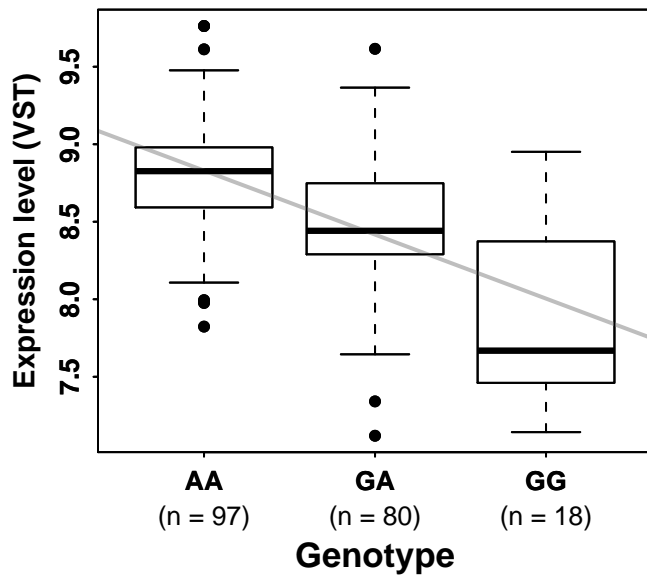

rs11750568 vs. ILMN\_2224946

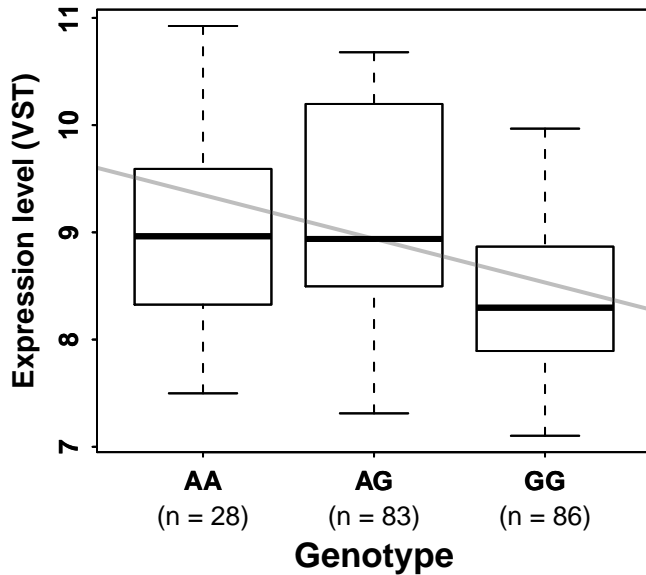

rs2600359 vs. ILMN\_1730477

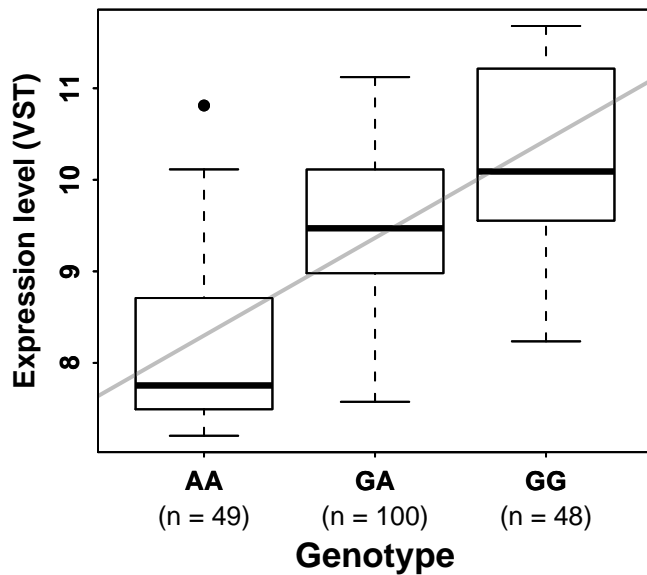

rs7313 vs. ILMN\_2400759

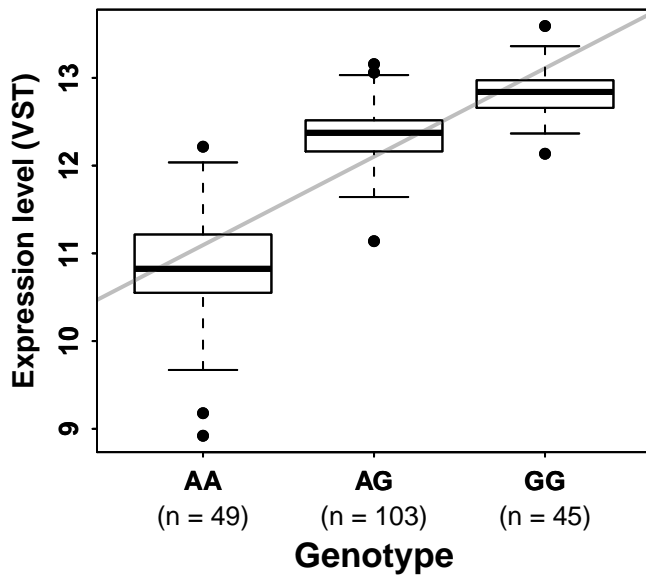

rs2182513 vs. ILMN\_1689177

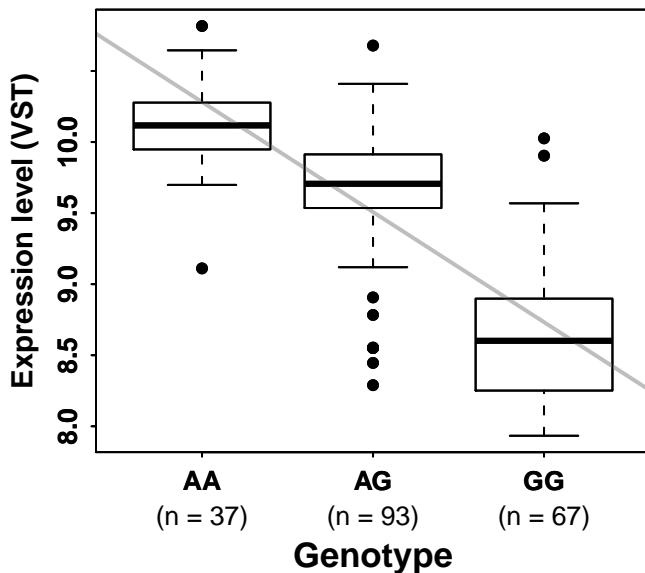

rs136564 vs. ILMN\_1809147

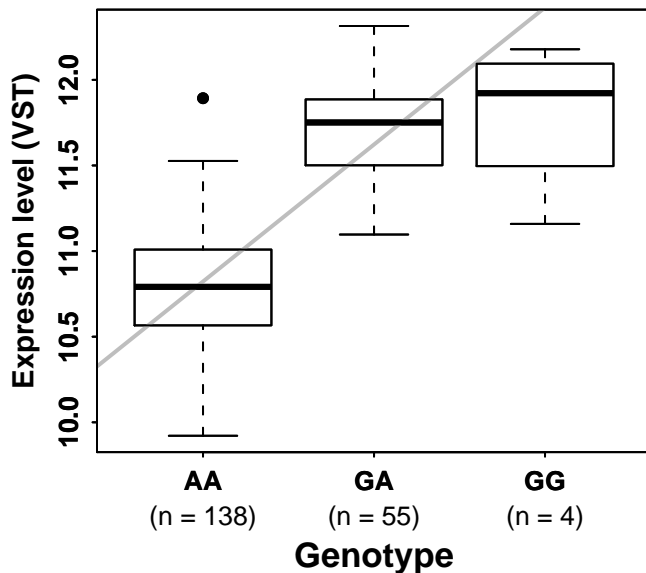

rs3826884 vs. ILMN\_2049417

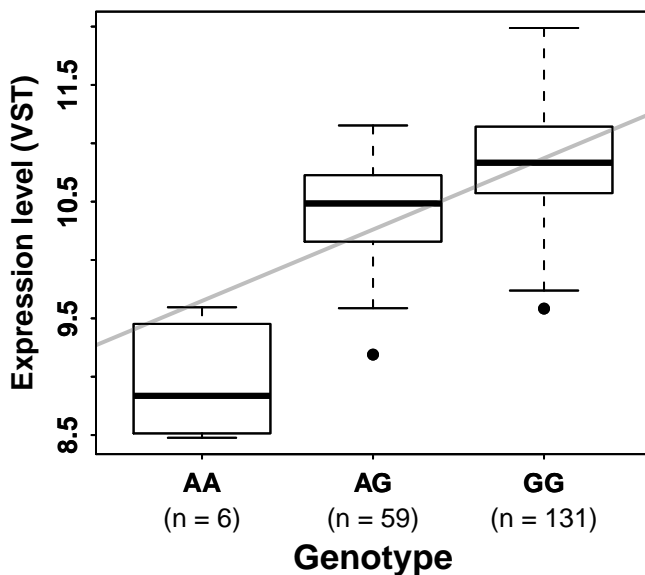

rs1562337 vs. ILMN\_2115862

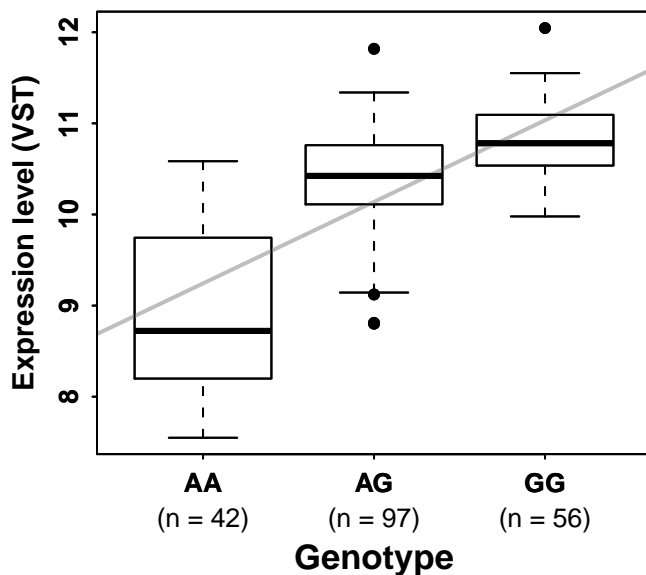

rs2523946 vs. ILMN\_2130441

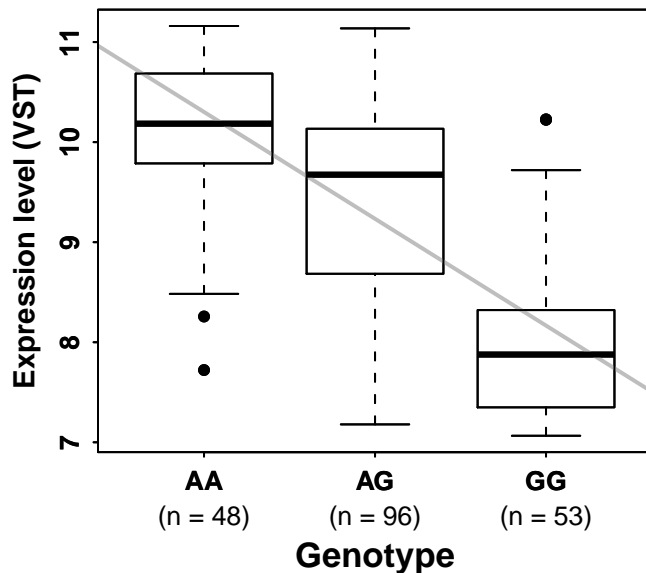

rs184580 vs. ILMN\_1804662

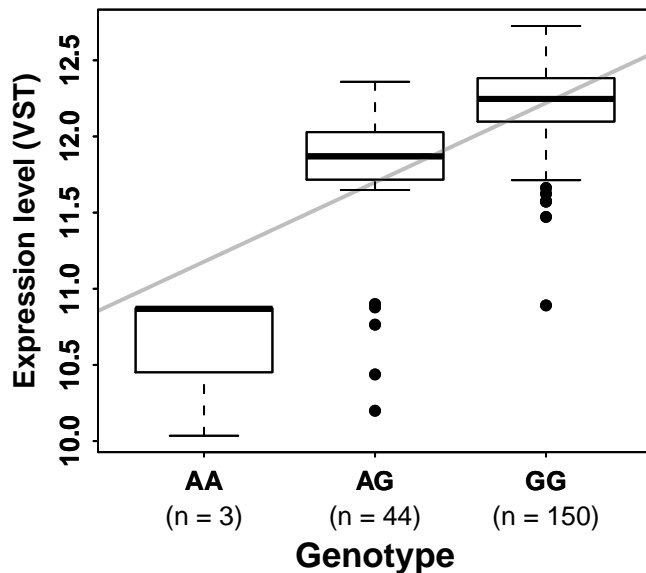

rs9813644 vs. ILMN\_1696151

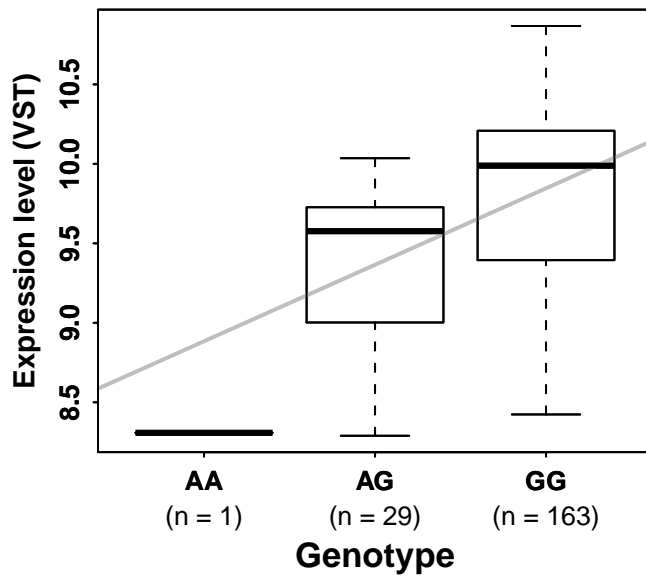

rs868150 vs. ILMN\_2388272

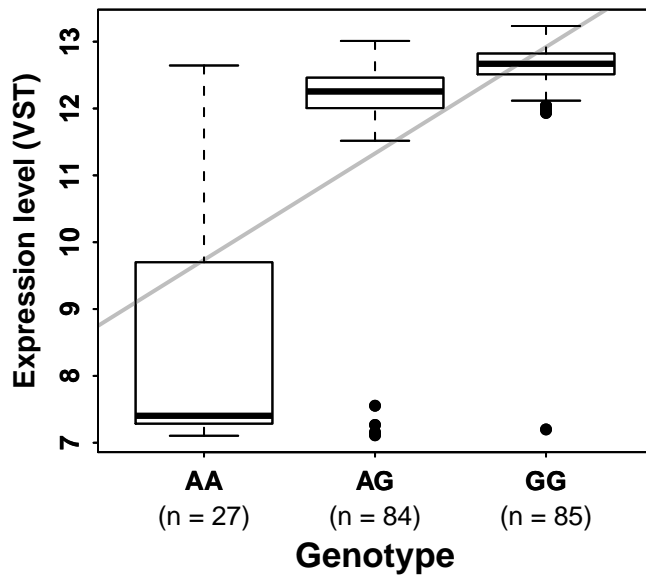

rs2074222 vs. ILMN\_1768595

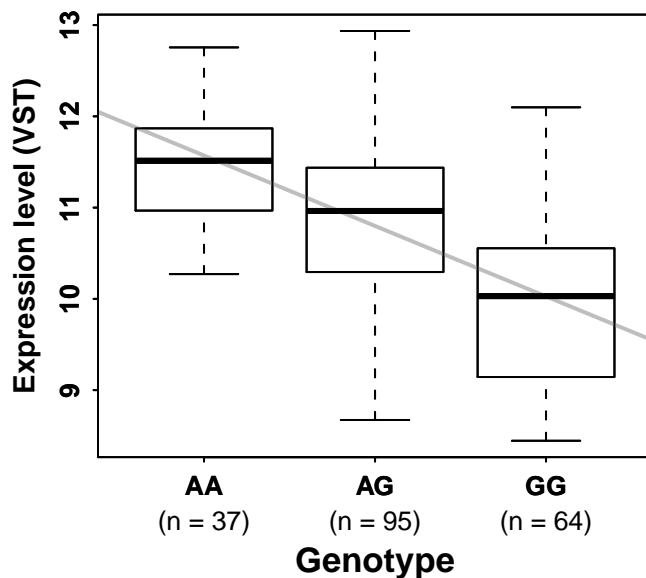

rs11170624 vs. ILMN\_1807798

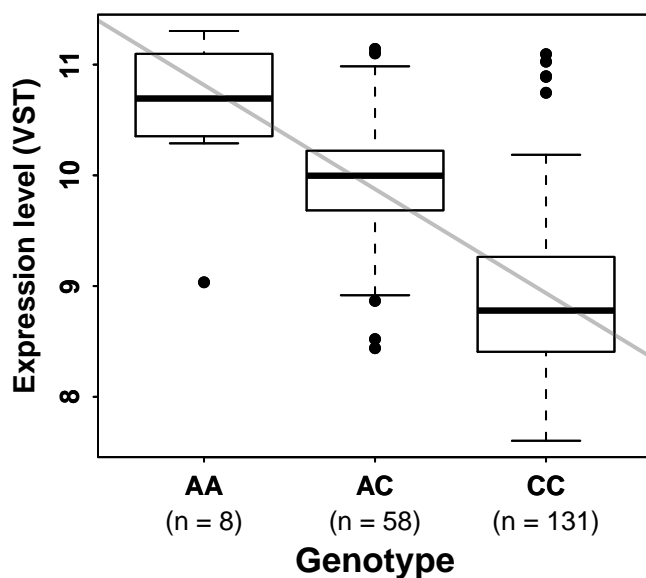

rs11012 vs. ILMN\_2286783

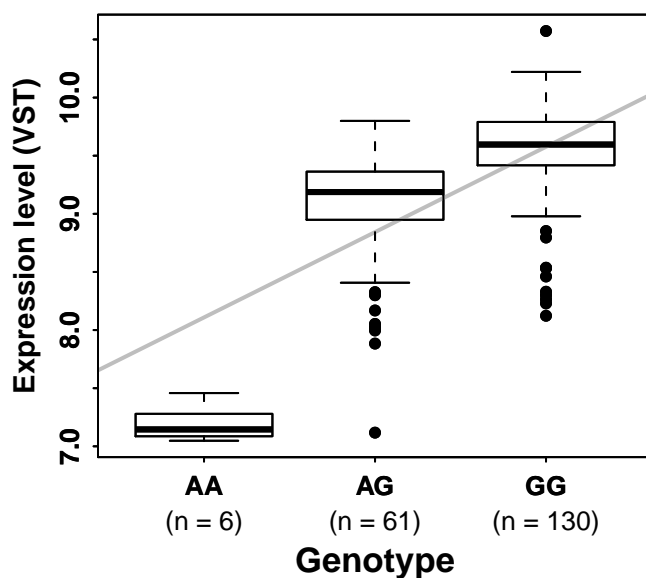

rs1736971 vs. ILMN\_2203729

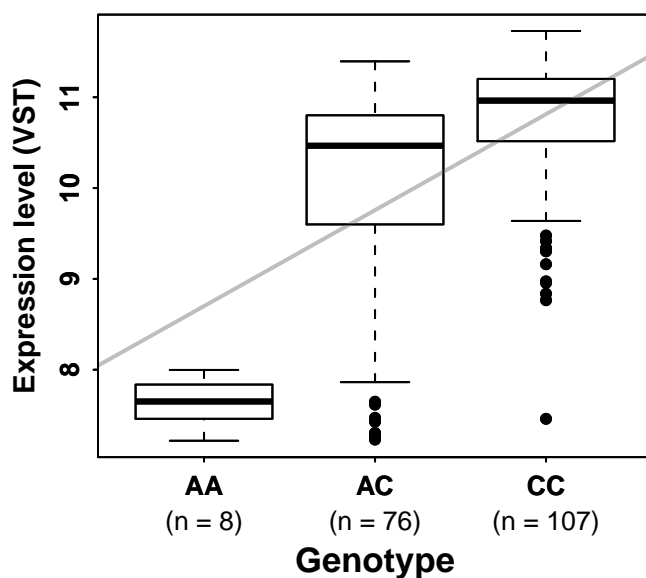

rs3907099 vs. ILMN\_2170595

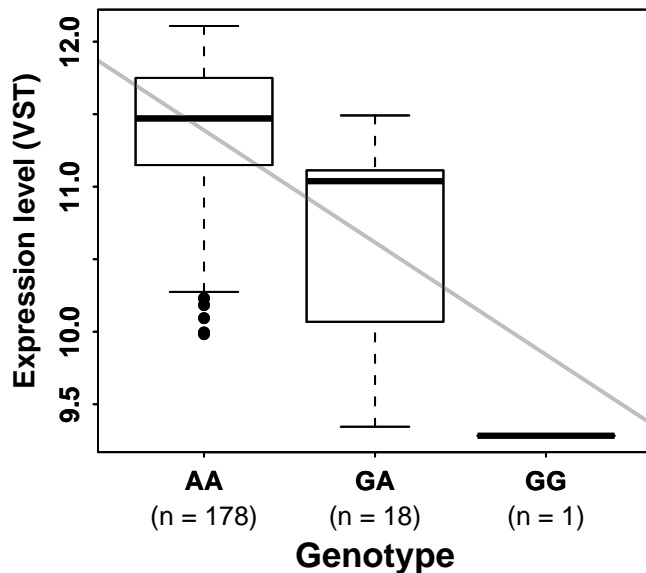

rs4965320 vs. ILMN\_1743142

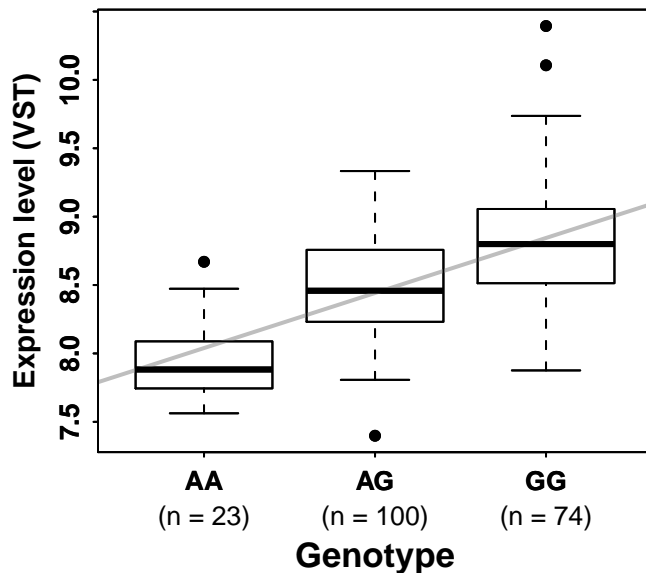

rs9455927 vs. ILMN\_1676679

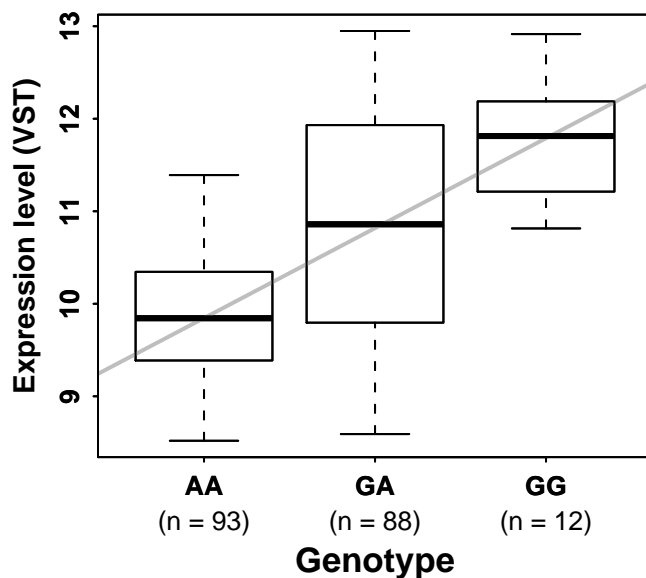

rs393990 vs. ILMN\_1658519

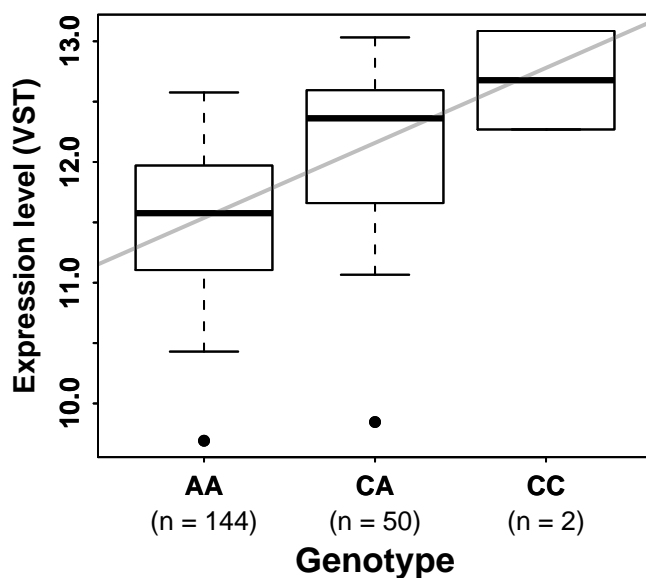

rs1427281 vs. ILMN\_2127098

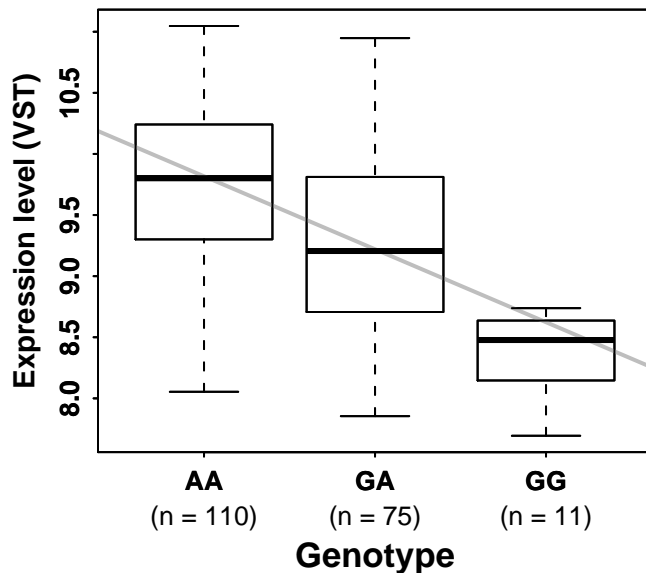

rs3809482 vs. ILMN\_1691772

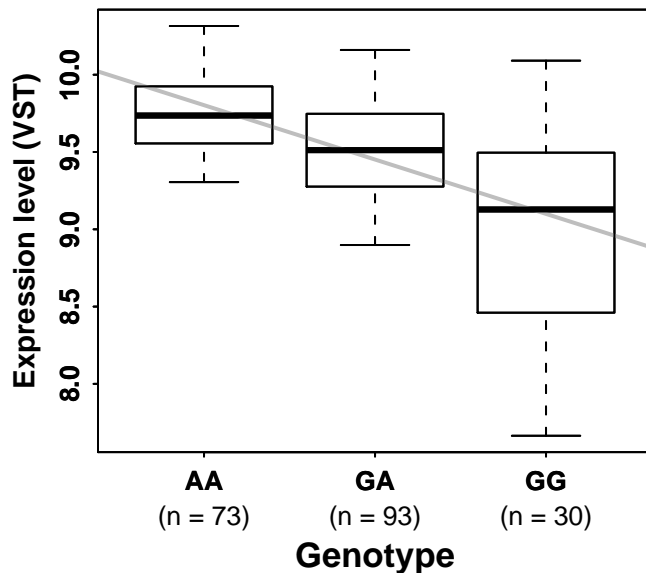

rs4938050 vs. ILMN\_1739214

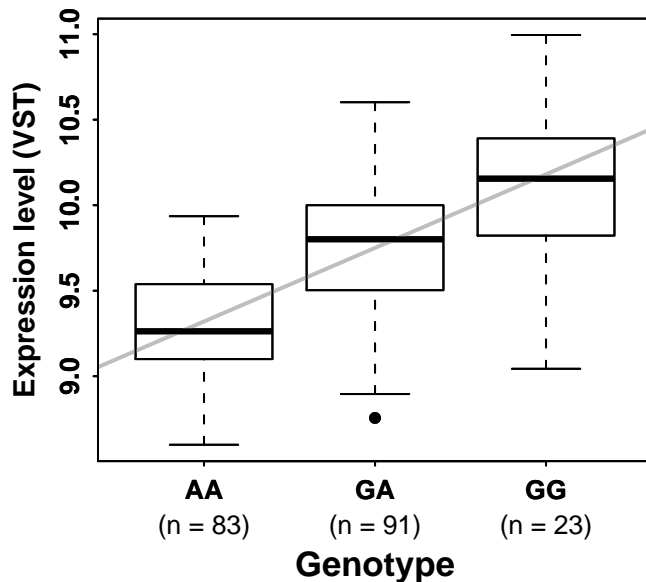

rs2304630 vs. ILMN\_1753164

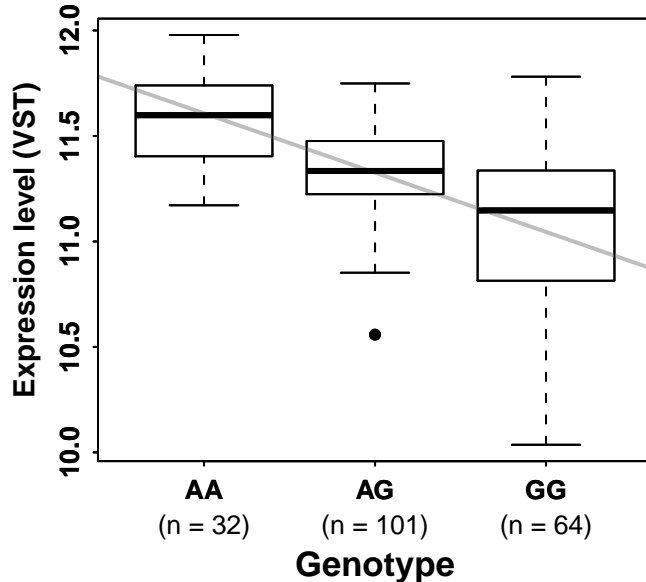

rs2294996 vs. ILMN\_1814247

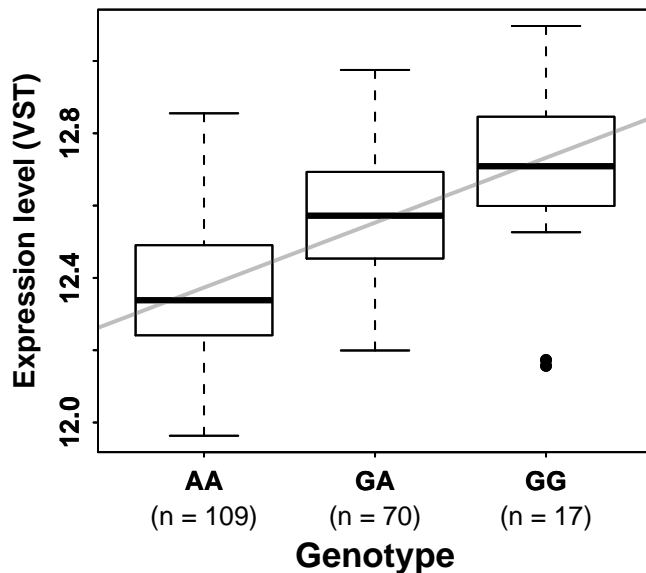

rs773107 vs. ILMN\_2209027

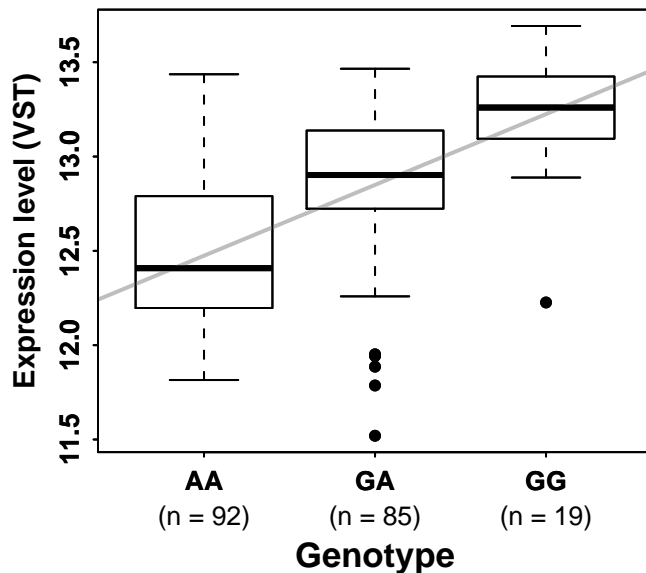

rs2843964 vs. ILMN\_1774949

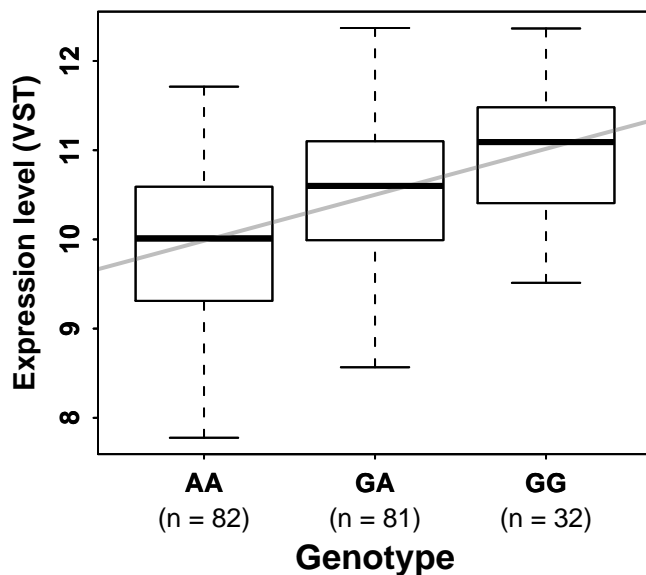

rs4822461 vs. ILMN\_1789418

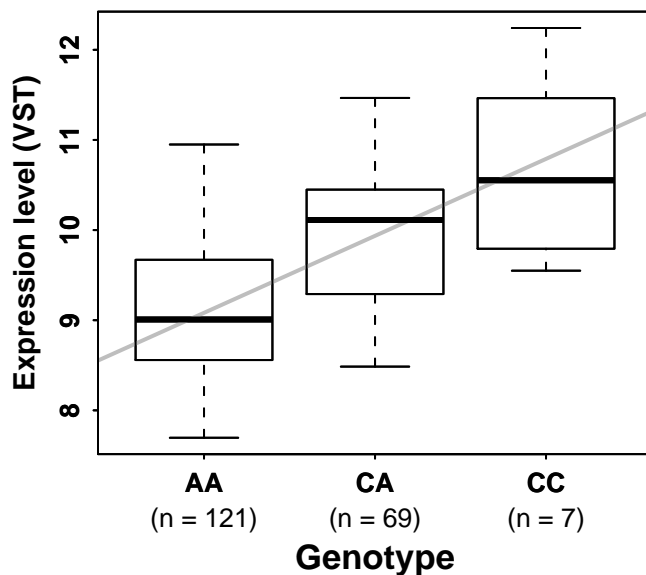



rs832582 vs. ILMN\_1757636

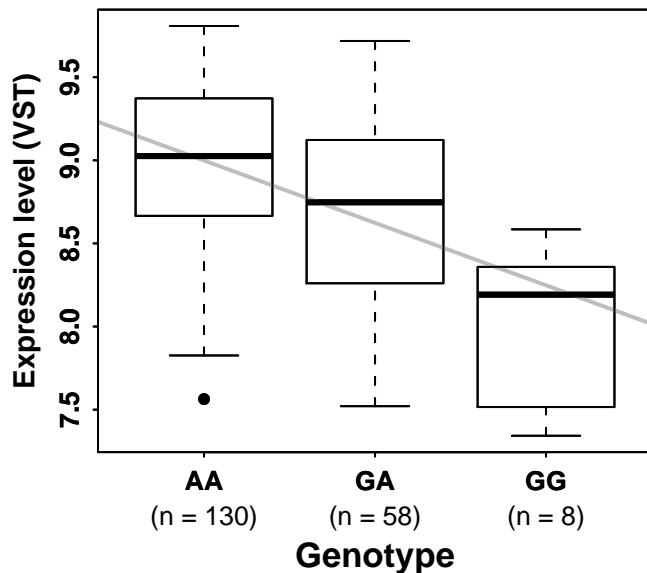

rs816931 vs. ILMN\_1767801

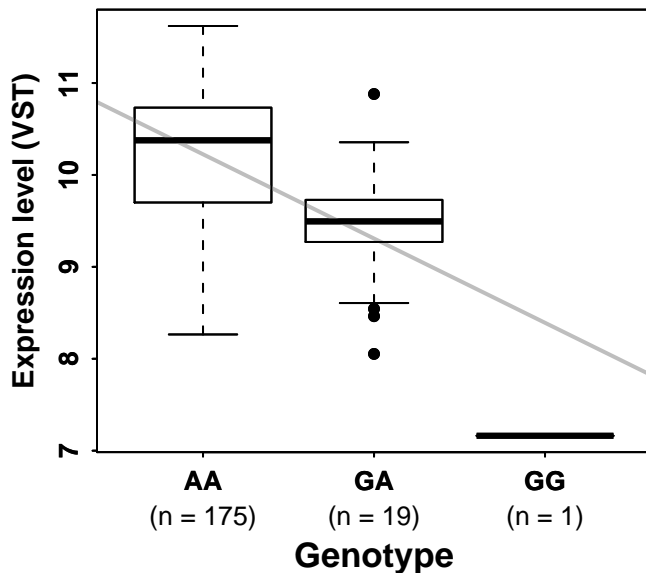

rs4813547 vs. ILMN\_1680015

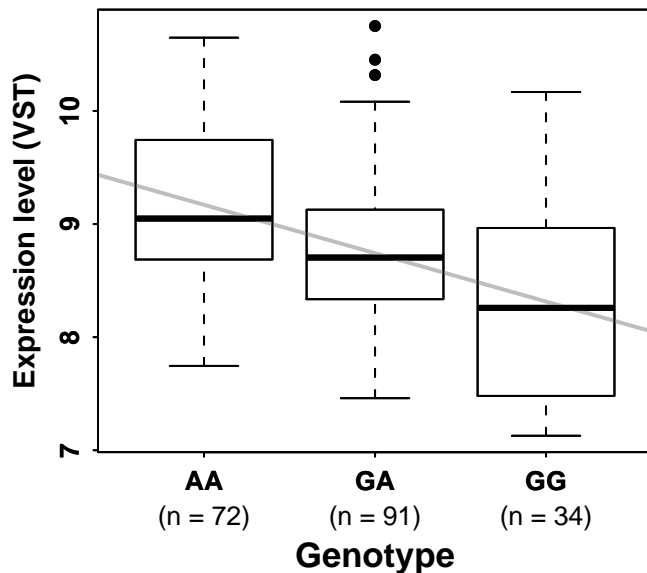

rs2838808 vs. ILMN\_2376667

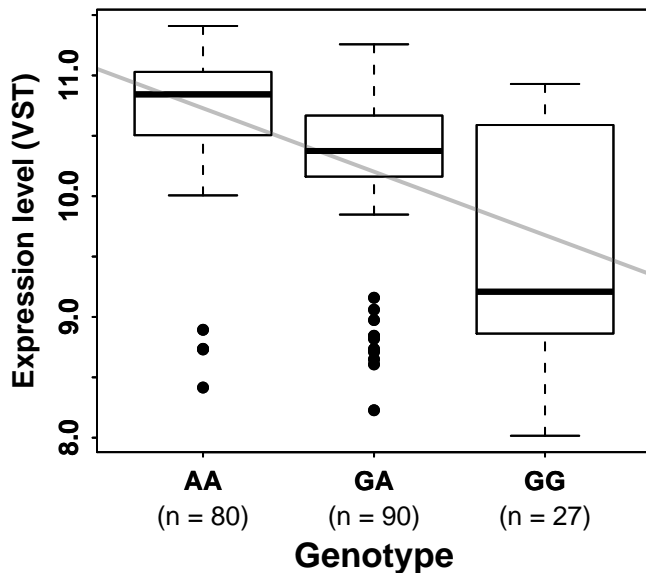

rs10402271 vs. ILMN\_2320280

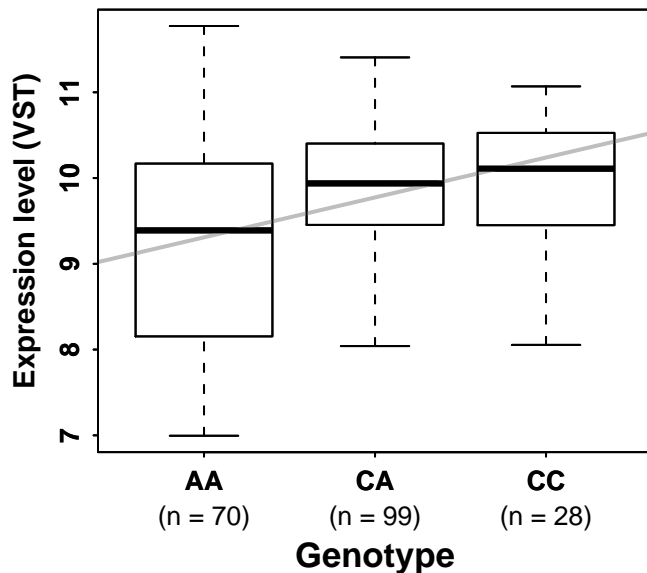

rs10402271 vs. ILMN\_2320280

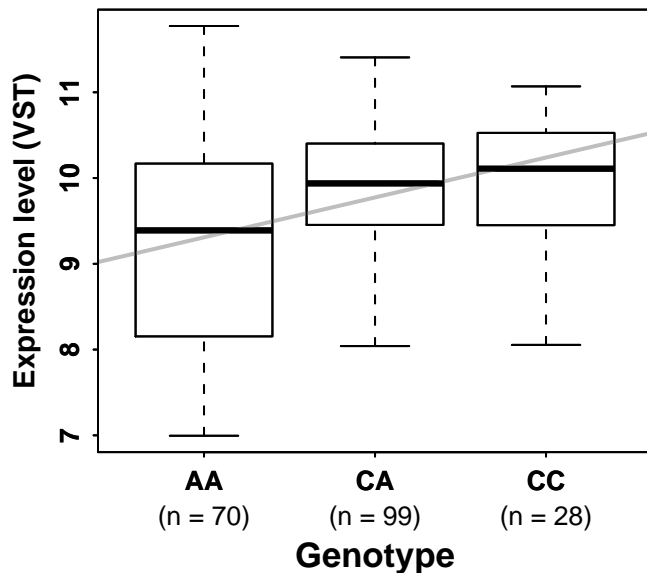

rs10402271 vs. ILMN\_2320280

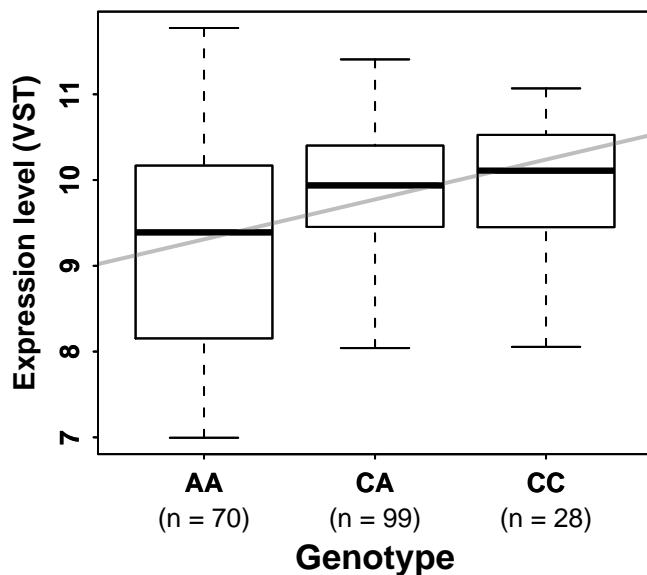

rs10929262 vs. ILMN\_2115862

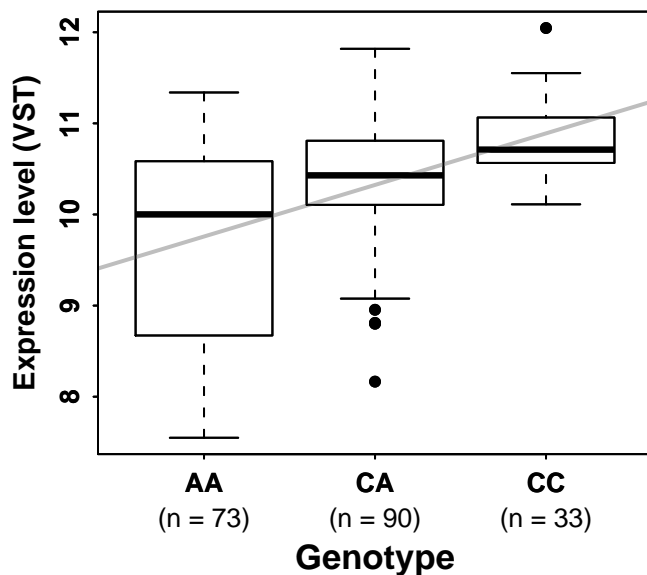

rs11677350 vs. ILMN\_1716041

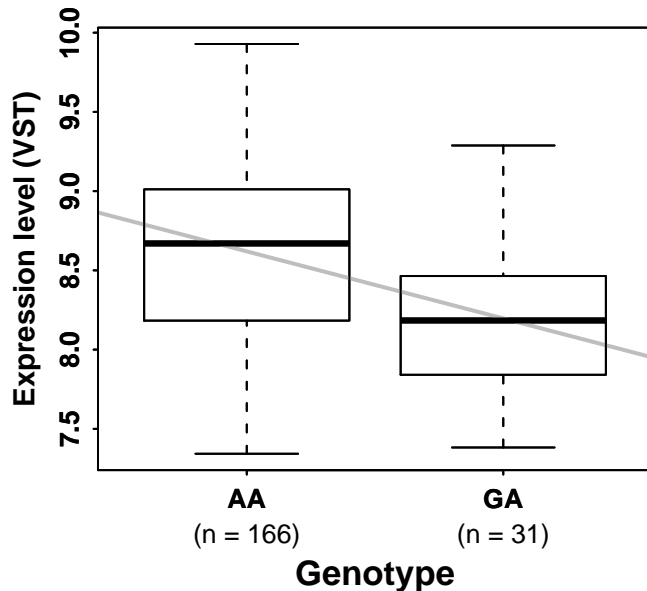

rs12883250 vs. ILMN\_2415572

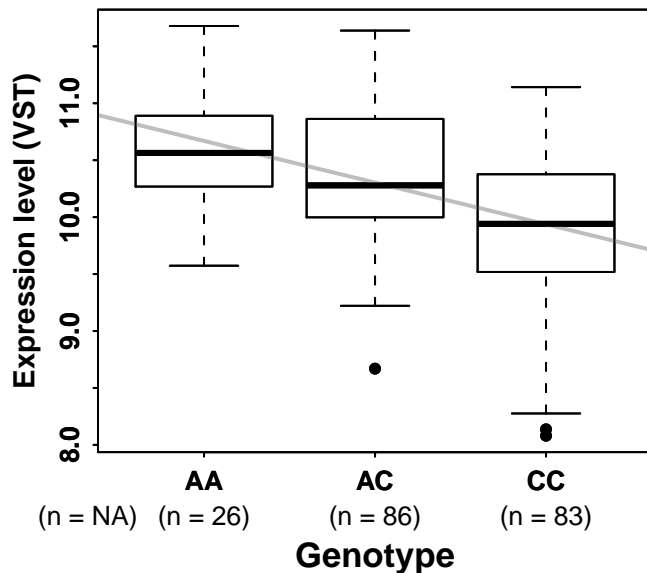

rs2395175 vs. ILMN\_2157441

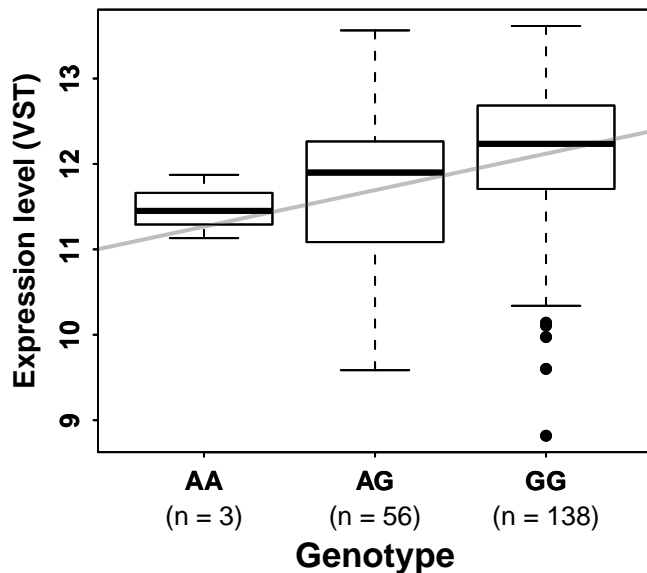

rs2729376 vs. ILMN\_1765332

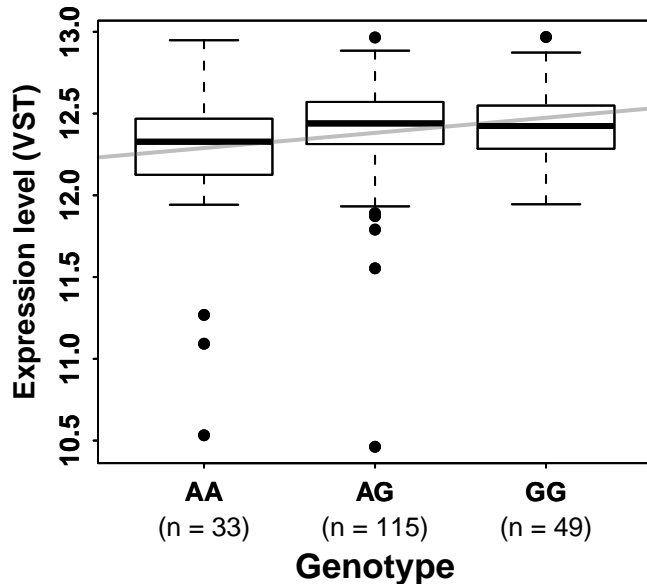

rs3759387 vs. ILMN\_1689156

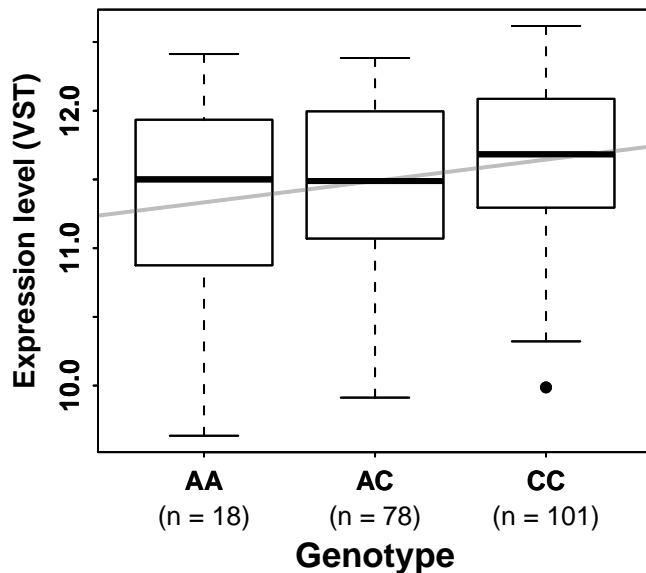

rs3800324 vs. ILMN\_1655748

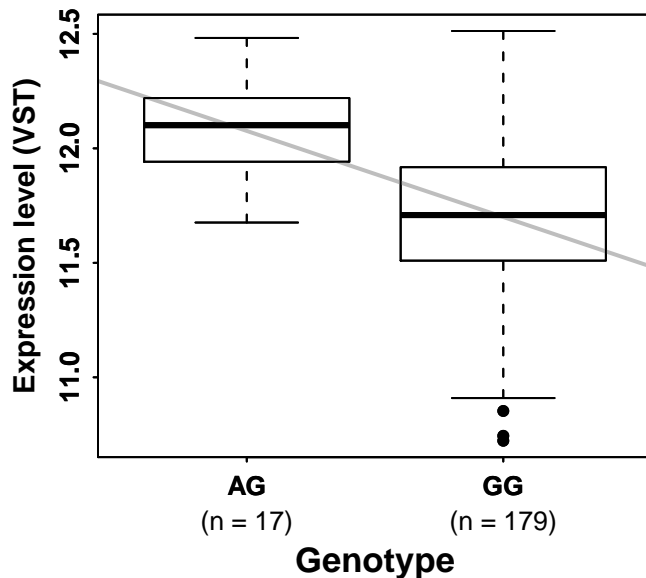

rs3800324 vs. ILMN\_2377991

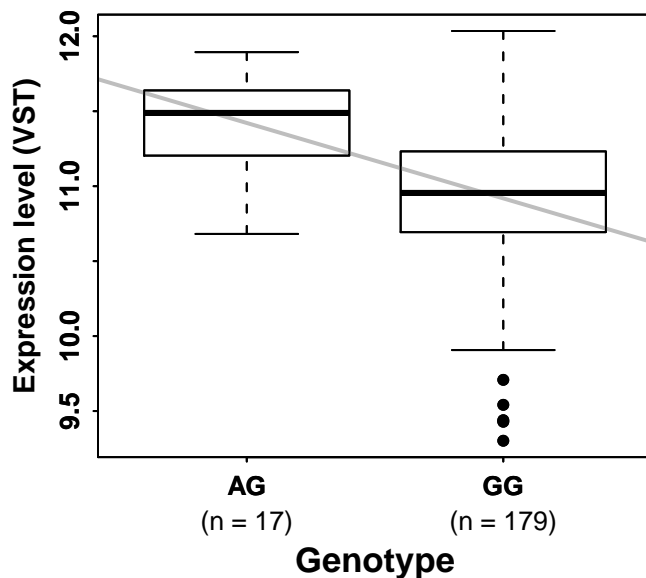

rs3923367 vs. ILMN\_1710315

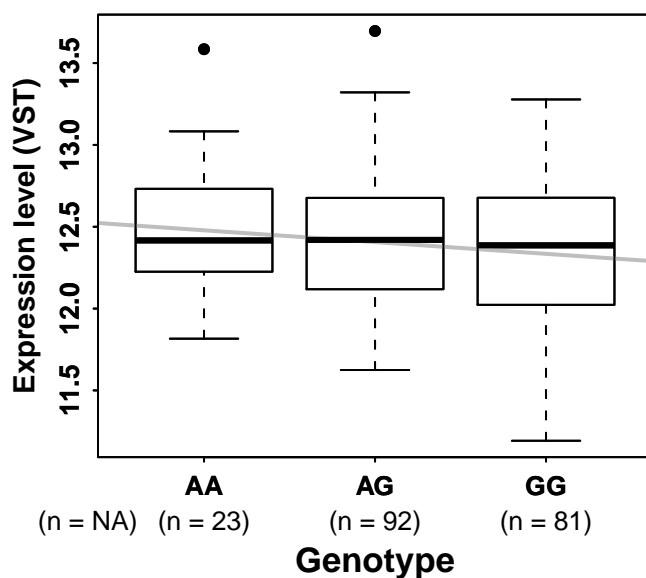

rs6733196 vs. ILMN\_1715203

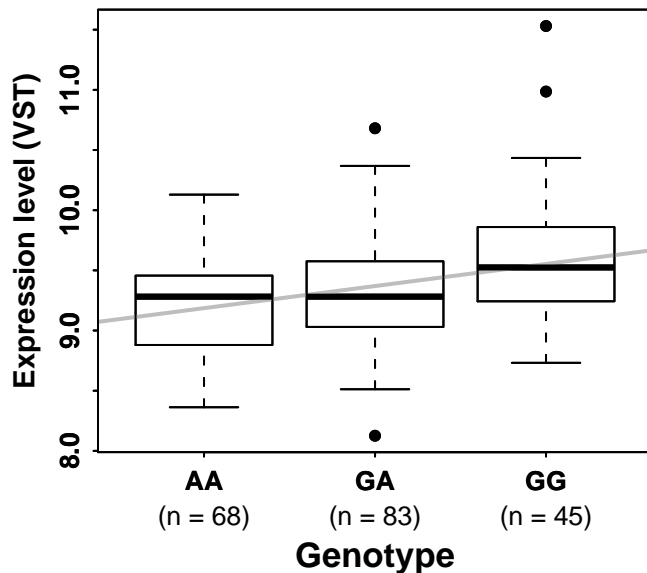

rs7002825 vs. ILMN\_1766770

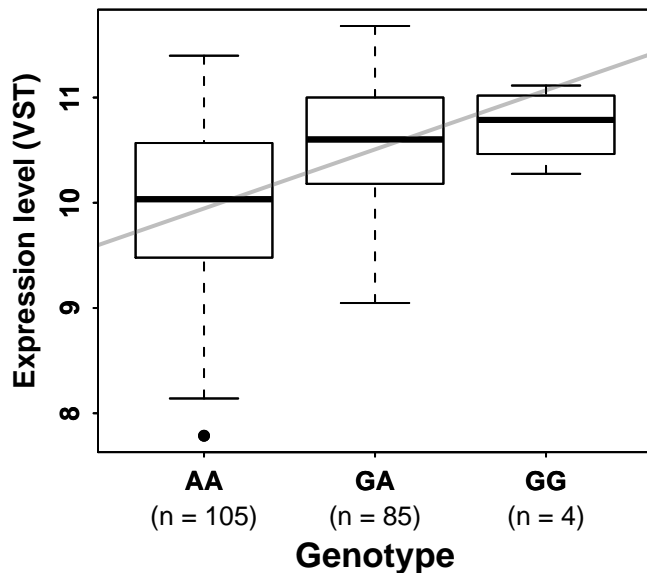

rs7254601 vs. ILMN\_1655637

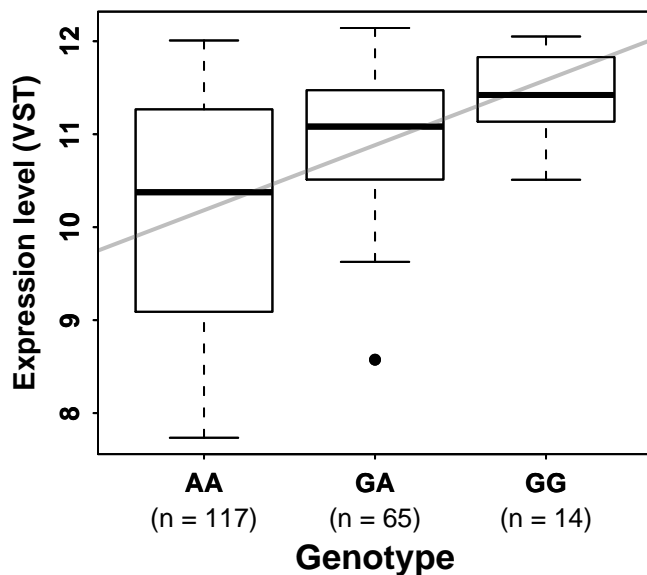

rs7416392 vs. ILMN\_1710315

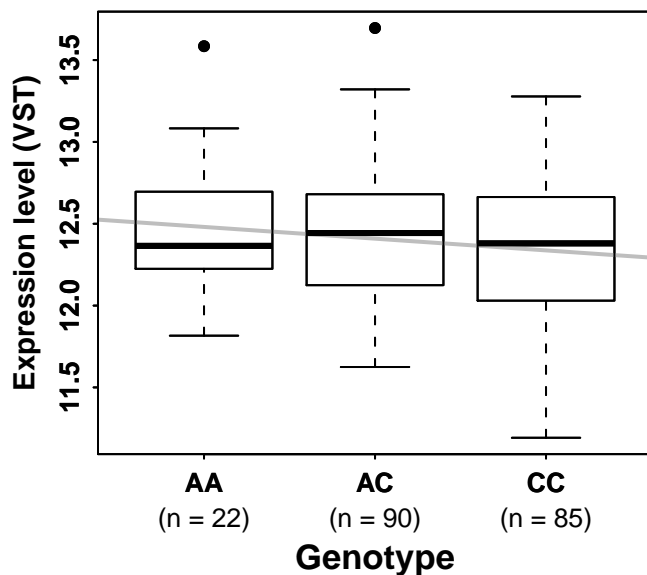

## rs7581626 vs. ILMN\_1715203

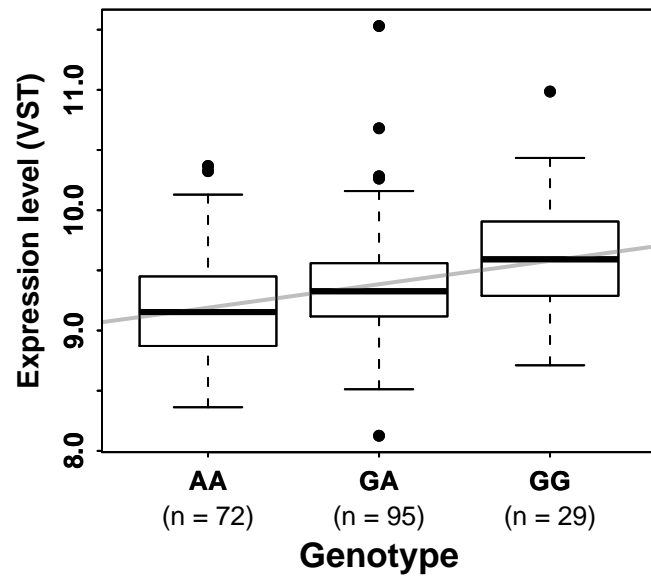

rs10843881 vs. ILMN\_2345908

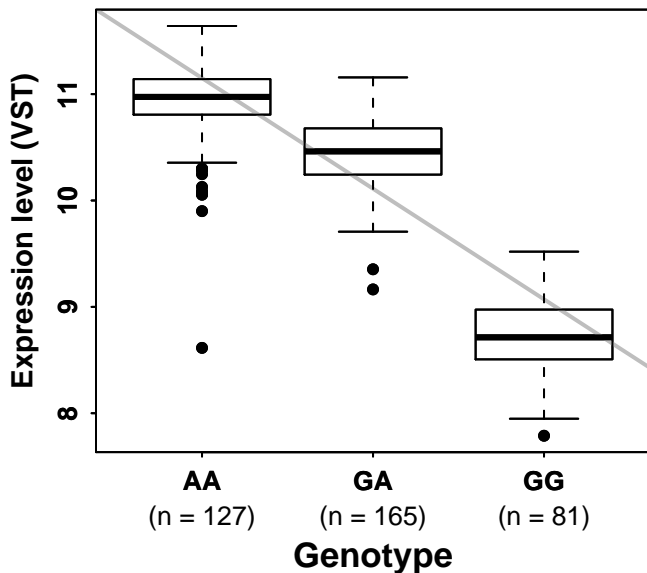

rs3802266 vs. ILMN\_2184966

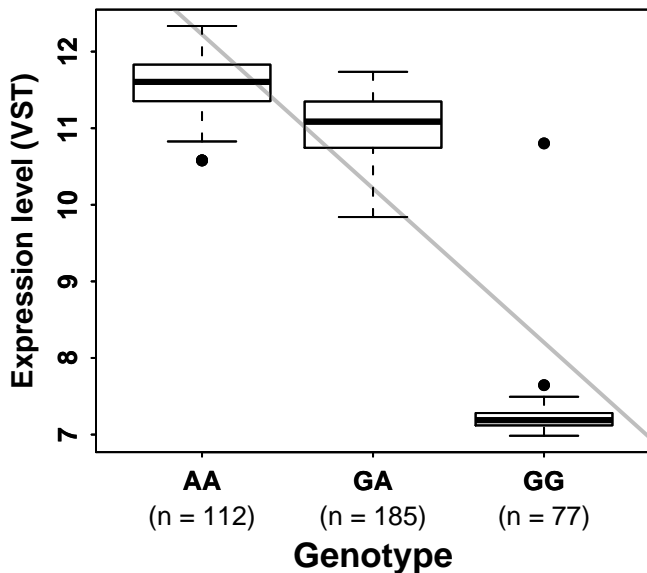

rs12185268 vs. ILMN\_1710903

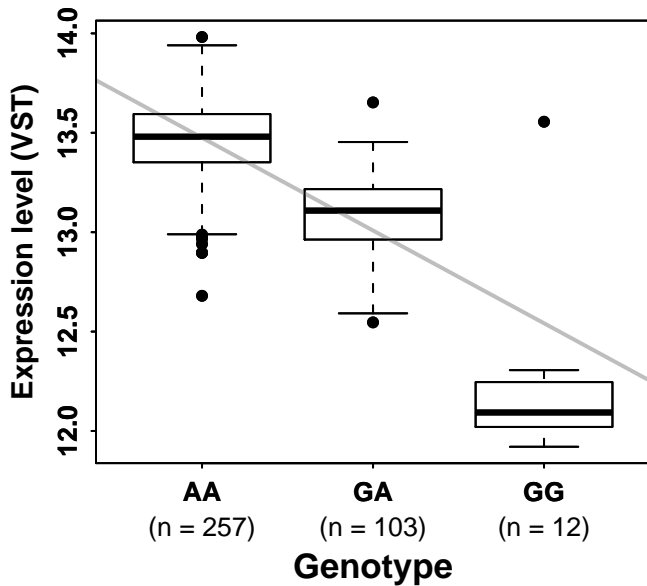

rs907548 vs. ILMN\_1775931

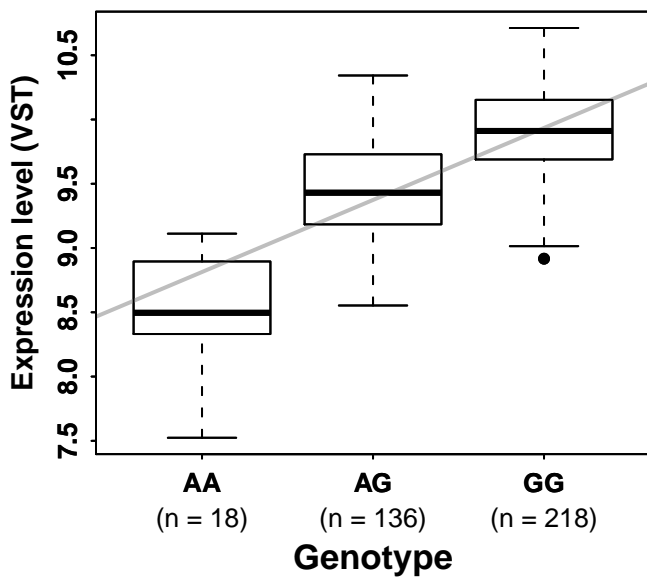

rs5029824 vs. ILMN\_2137066

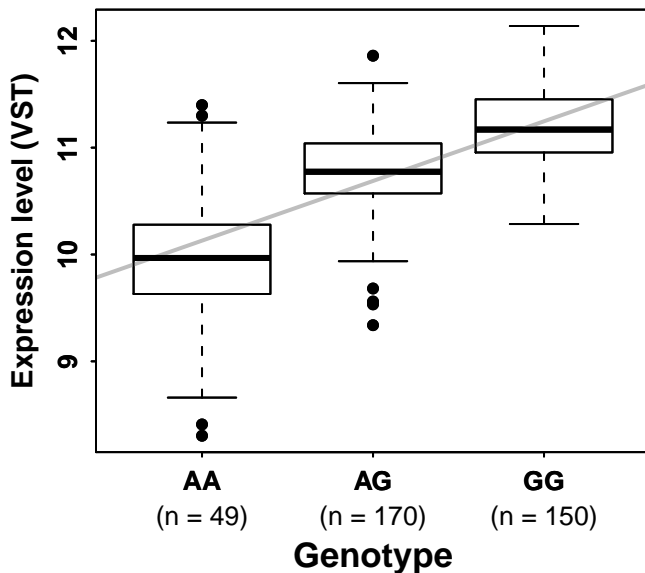

rs1047855 vs. ILMN\_2404850

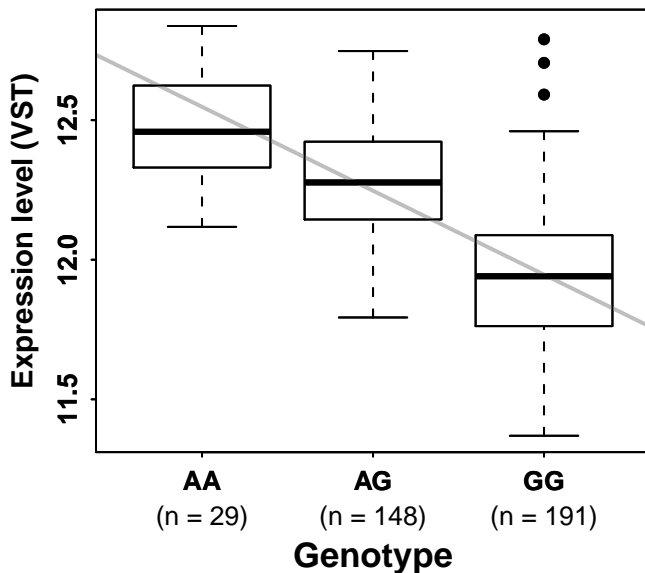

rs6581609 vs. ILMN\_2183938

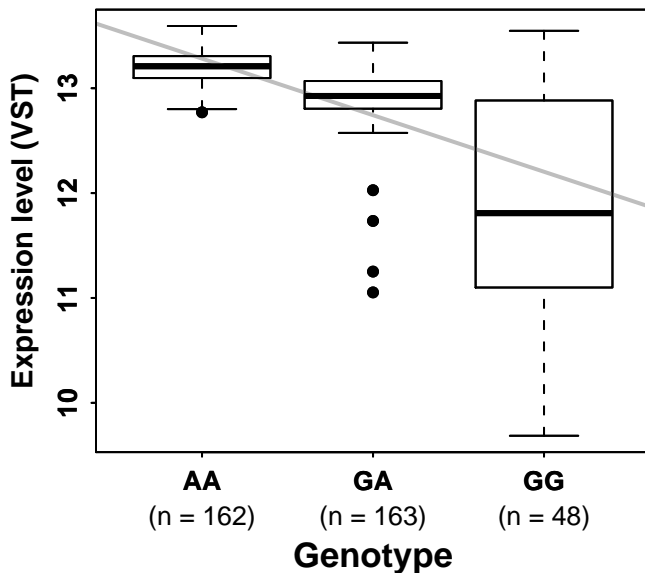

rs7951859 vs. ILMN\_2355738

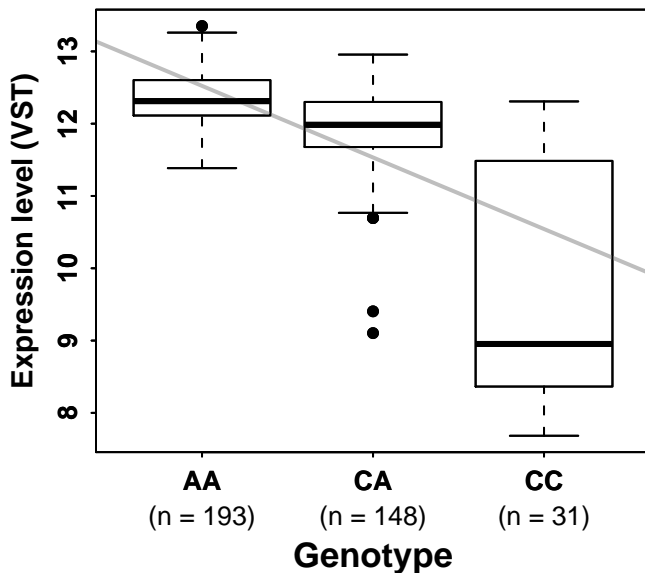



rs2106673 vs. ILMN\_2395932

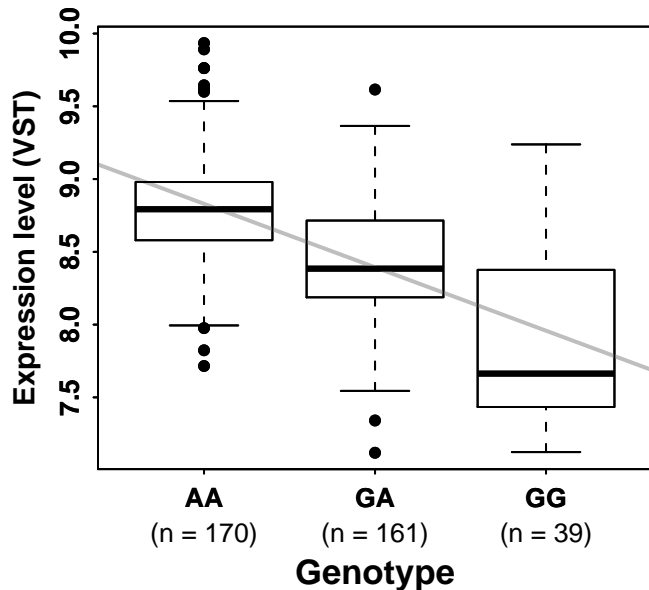

rs11750568 vs. ILMN\_2224946

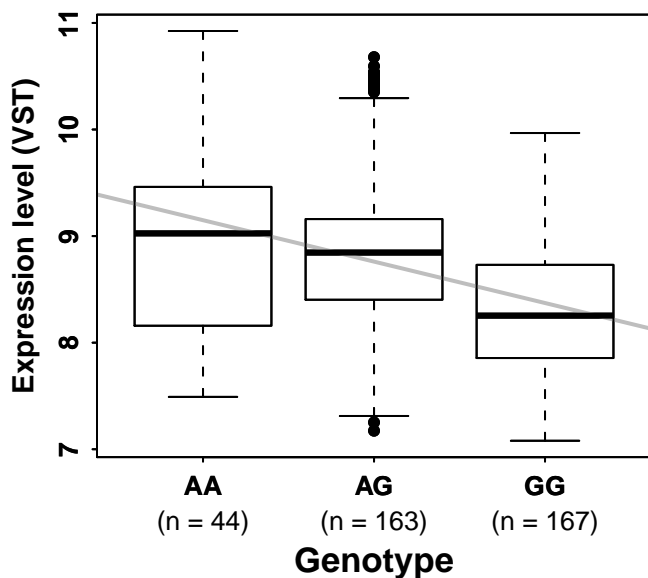

rs2600359 vs. ILMN\_1730477

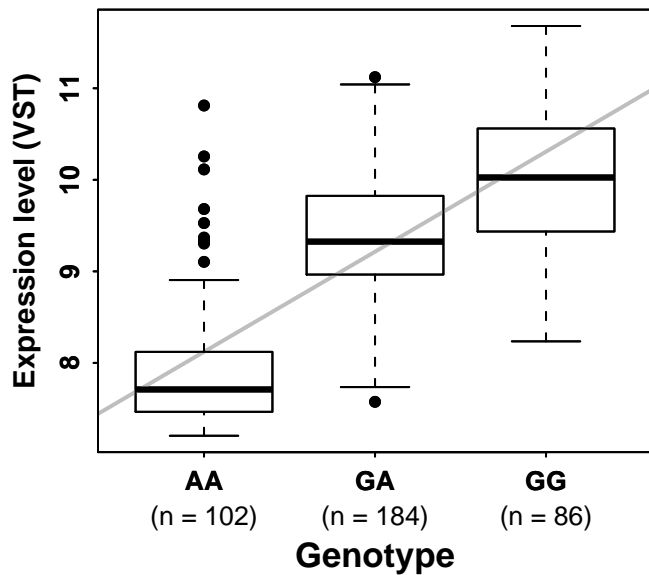

rs7313 vs. ILMN\_2400759

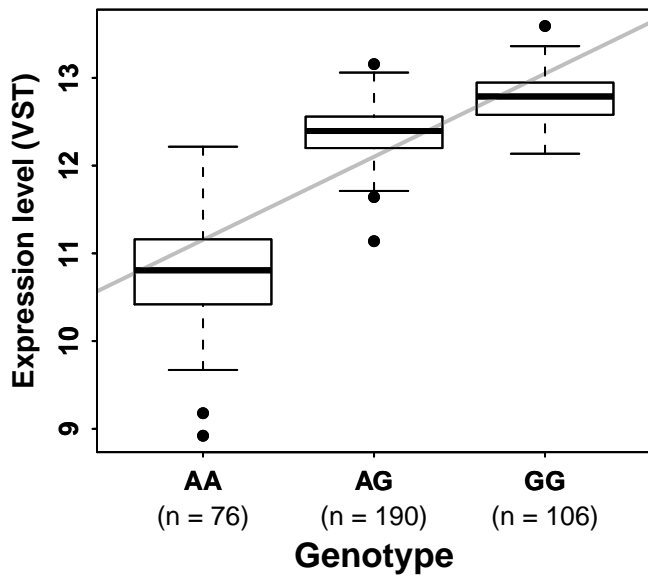

rs2182513 vs. ILMN\_1689177

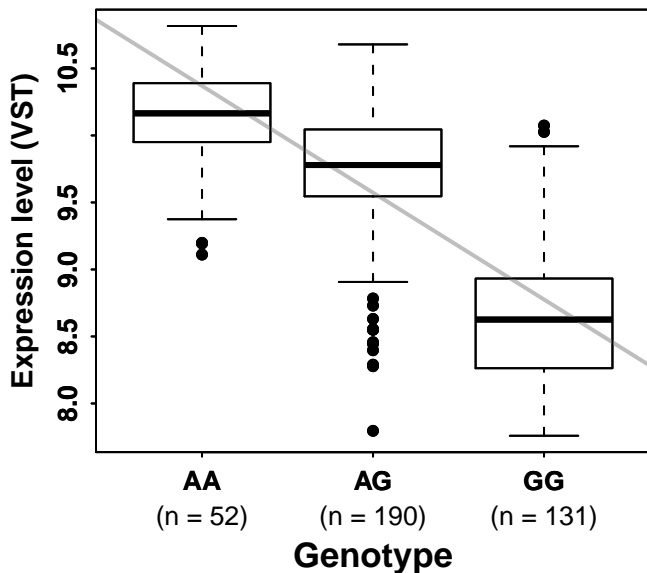

rs136564 vs. ILMN\_1809147

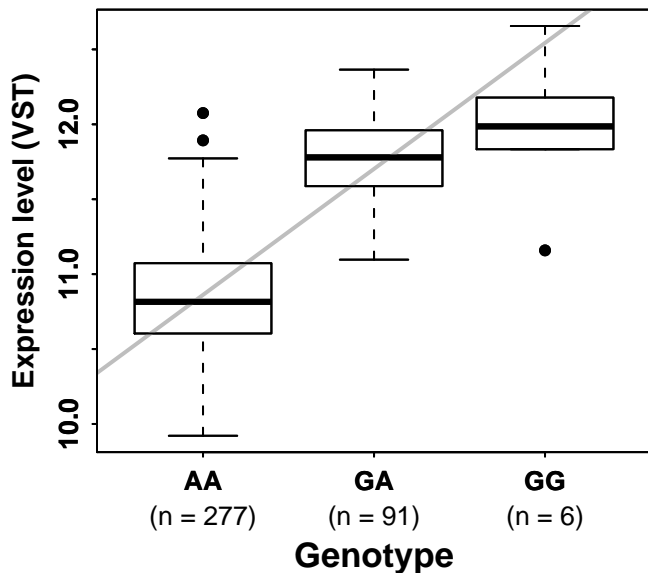

rs3826884 vs. ILMN\_2049417

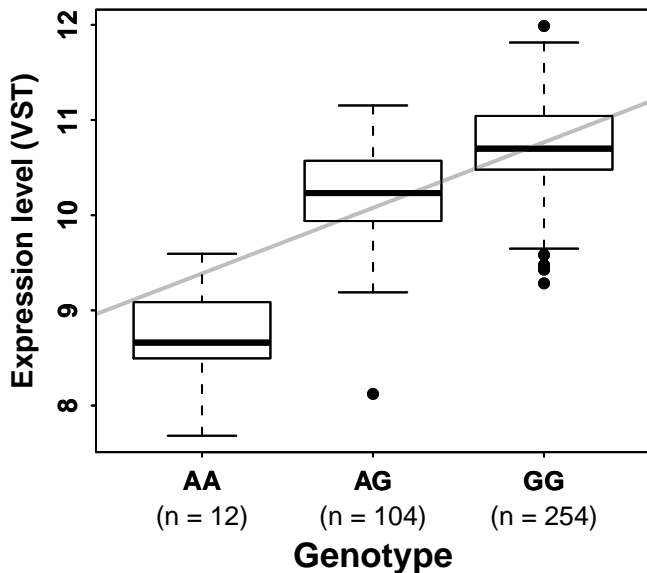

rs1562337 vs. ILMN\_2115862

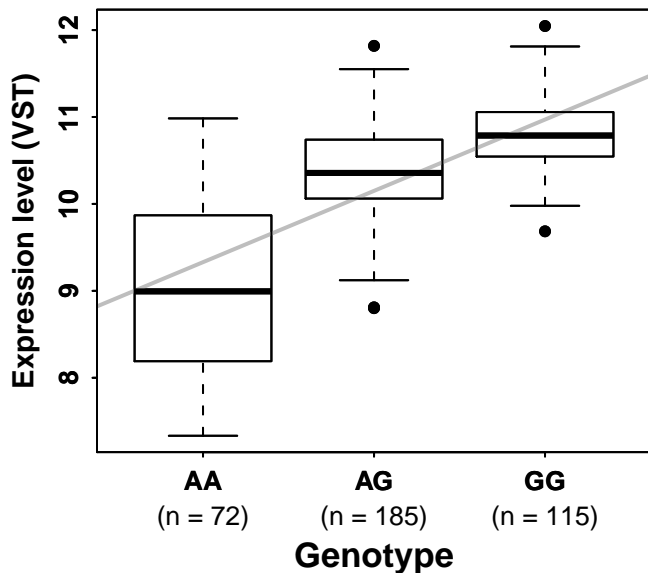

rs2523946 vs. ILMN\_2130441

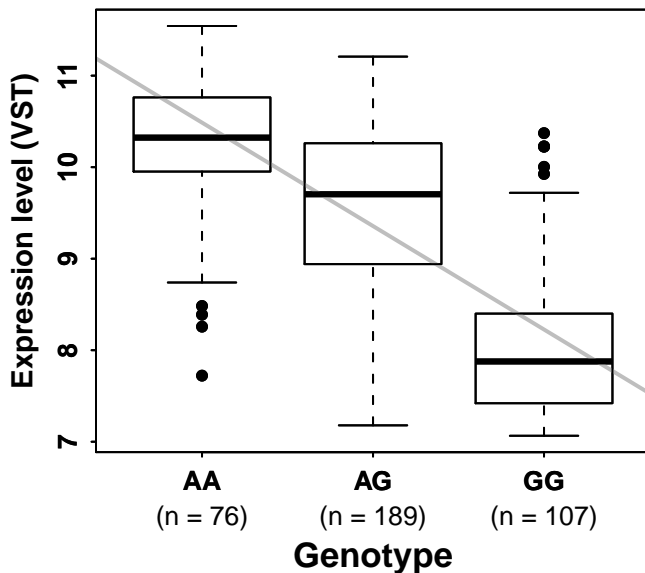

rs184580 vs. ILMN\_1804662

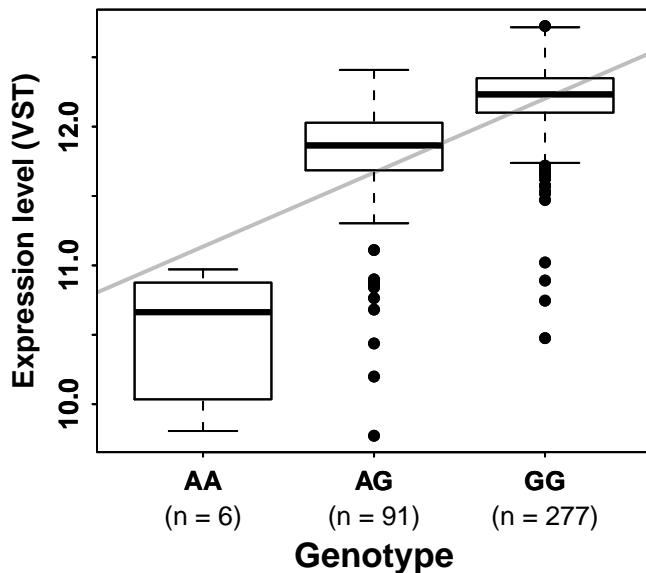

rs9813644 vs. ILMN\_1696151

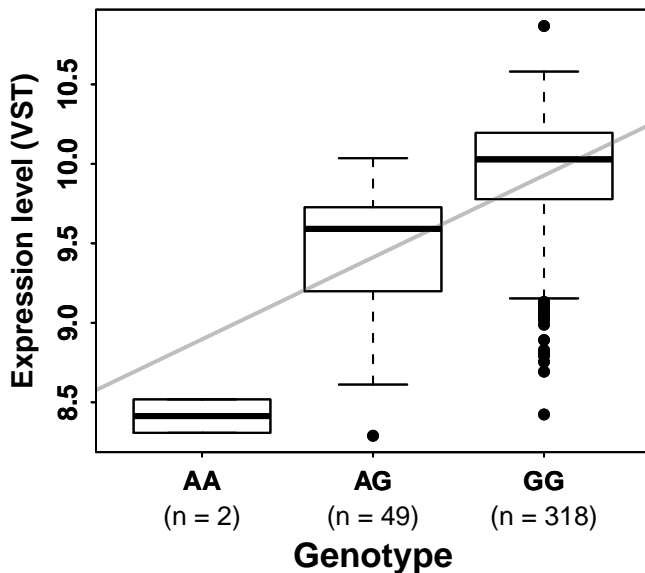

rs868150 vs. ILMN\_2388272

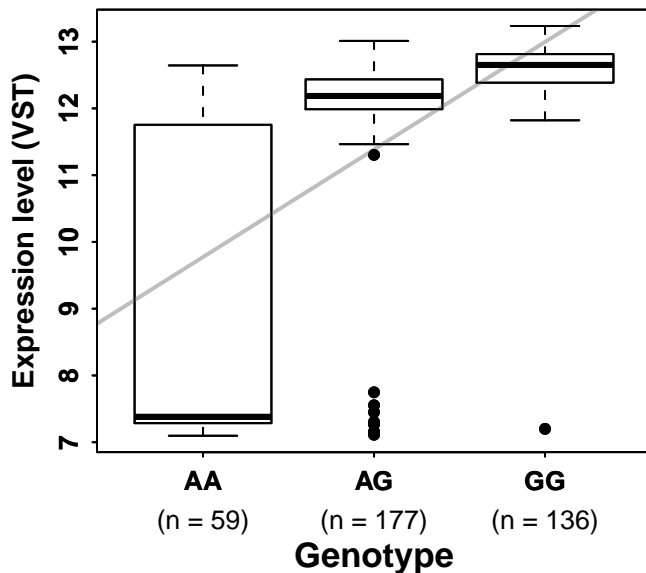

rs2074222 vs. ILMN\_1768595

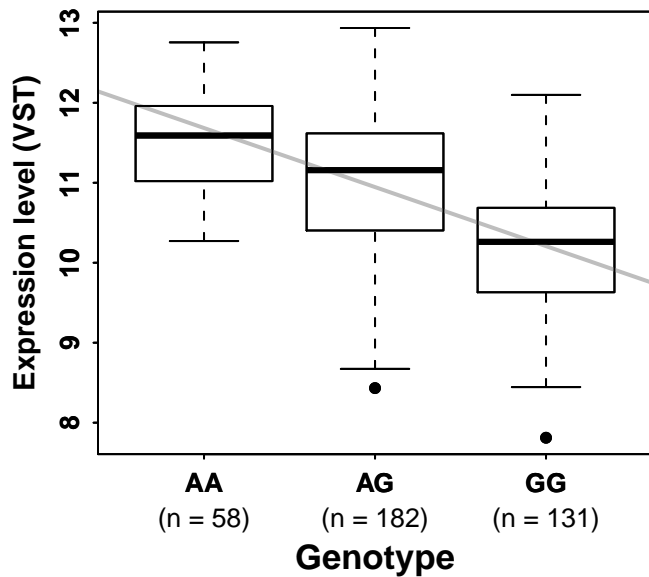

rs11170624 vs. ILMN\_1807798

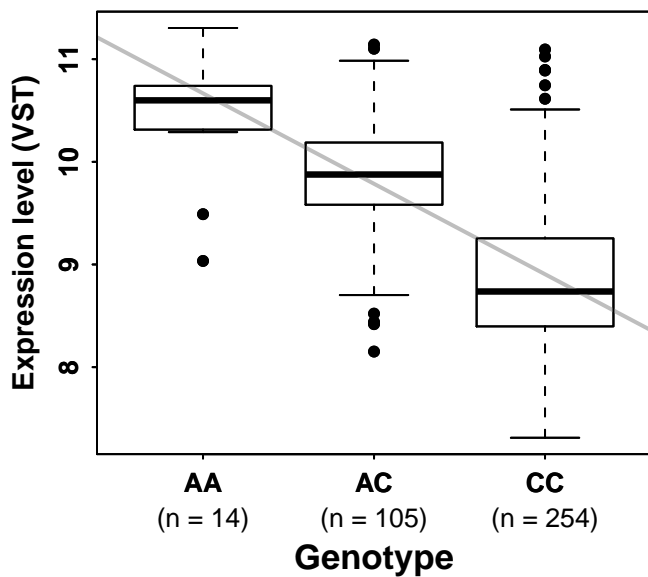

rs11012 vs. ILMN\_2286783

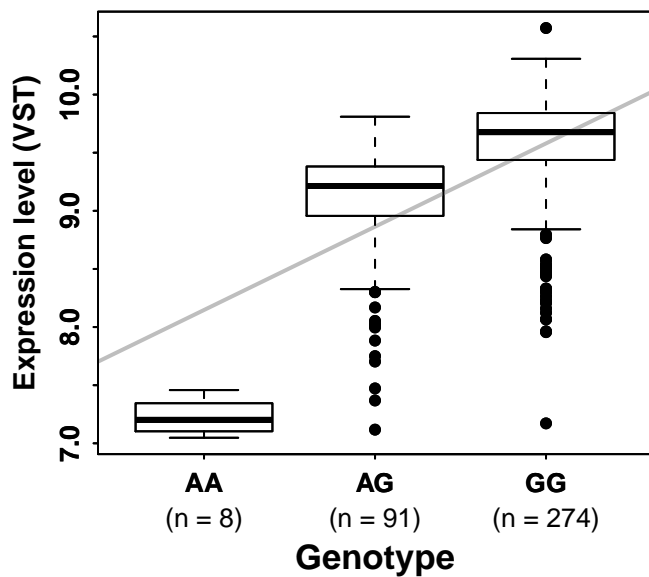

rs1736971 vs. ILMN\_2203729

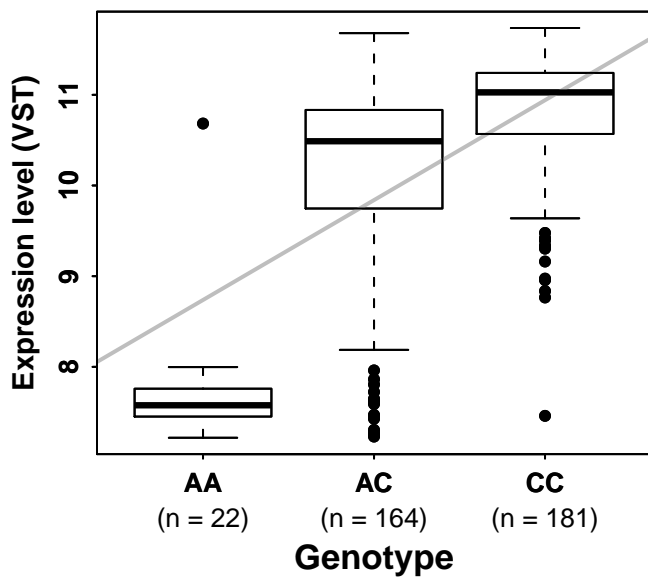

rs3907099 vs. ILMN\_2170595

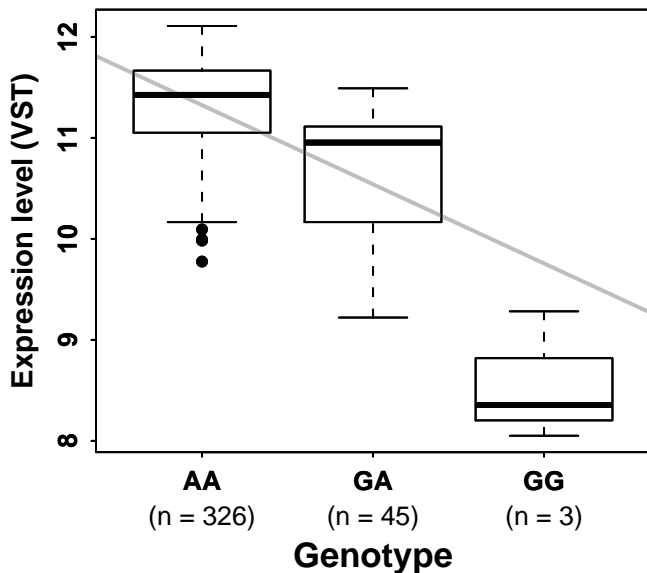

rs4965320 vs. ILMN\_1743142

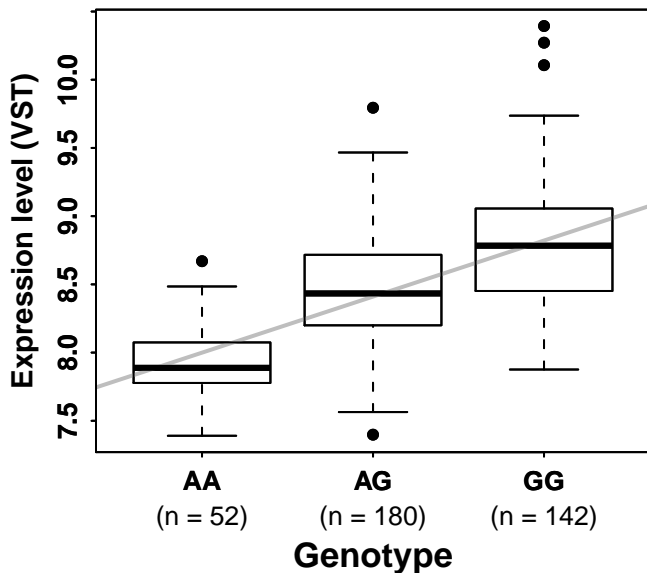

rs9455927 vs. ILMN\_1676679

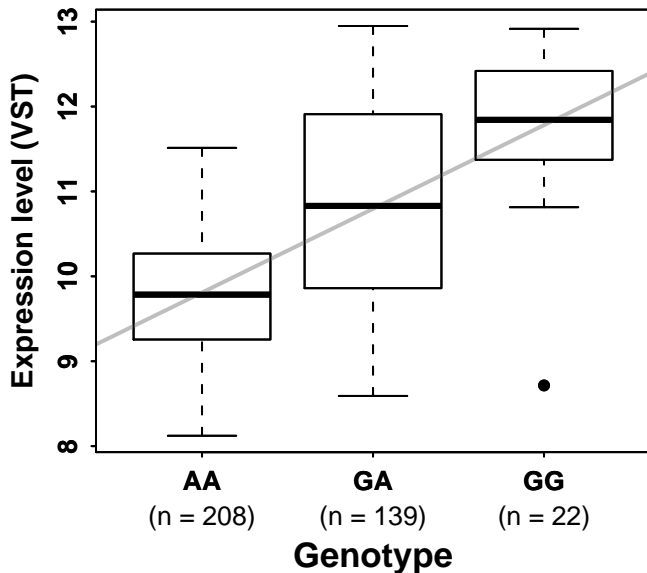

rs393990 vs. ILMN\_1658519

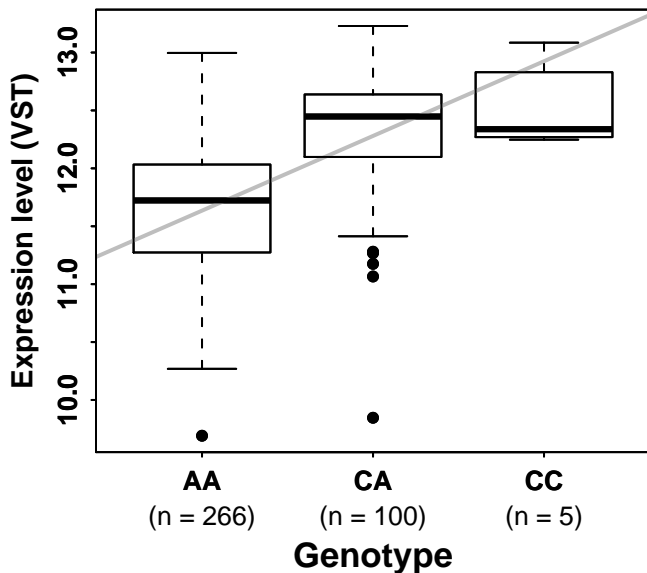

rs1427281 vs. ILMN\_2127098

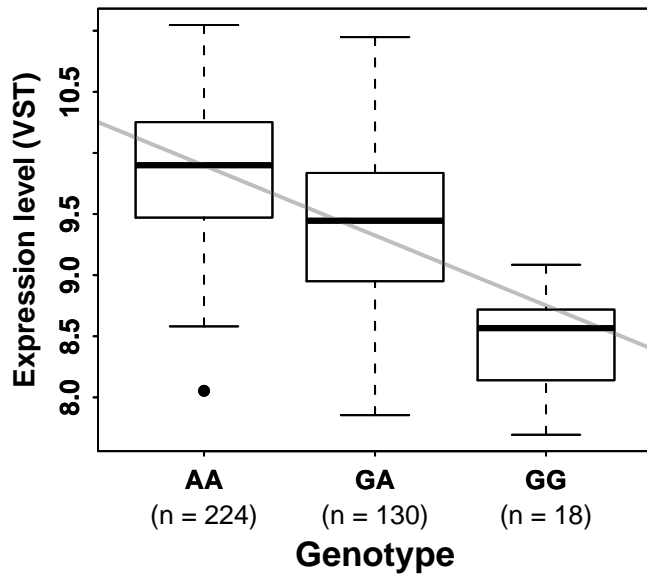

rs3809482 vs. ILMN\_1691772

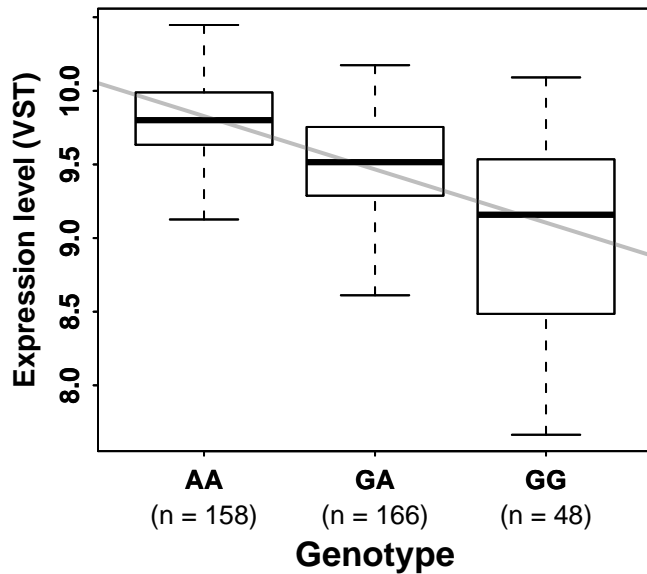

rs4938050 vs. ILMN\_1739214

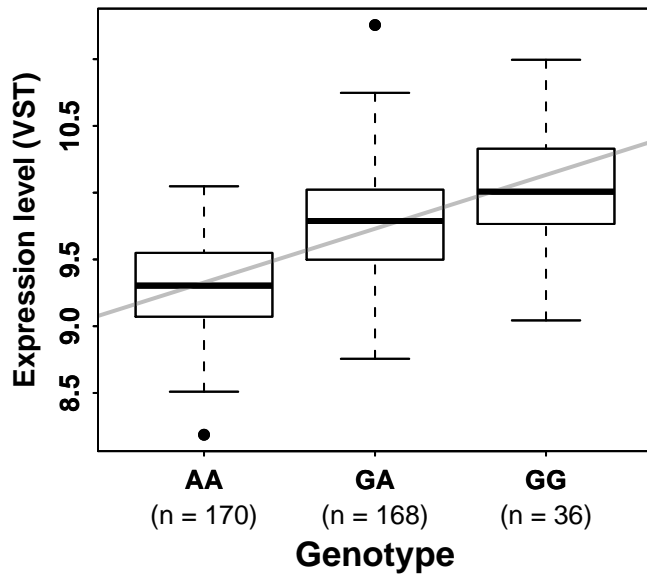

rs2304630 vs. ILMN\_1753164

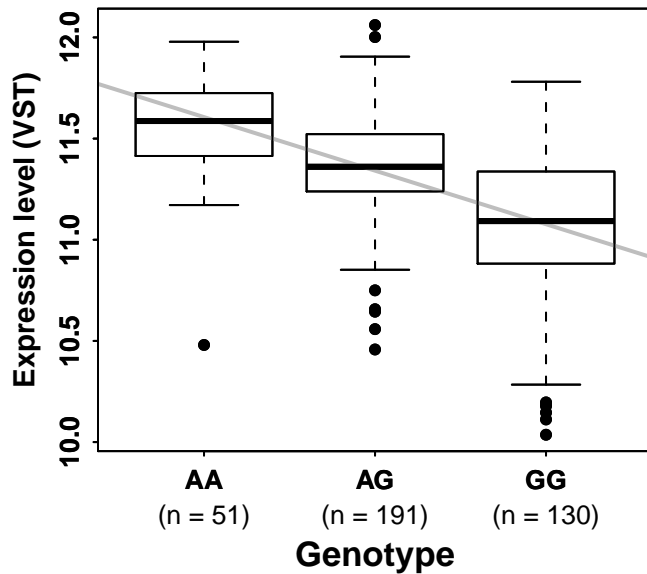

rs2294996 vs. ILMN\_1814247

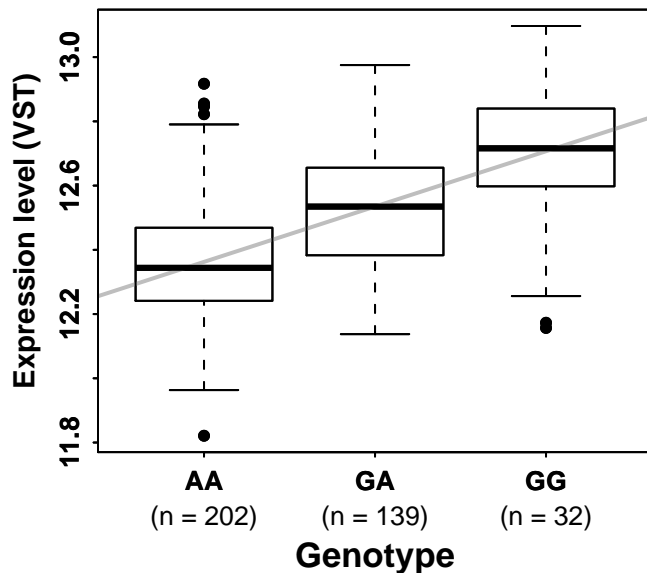

rs773107 vs. ILMN\_2209027

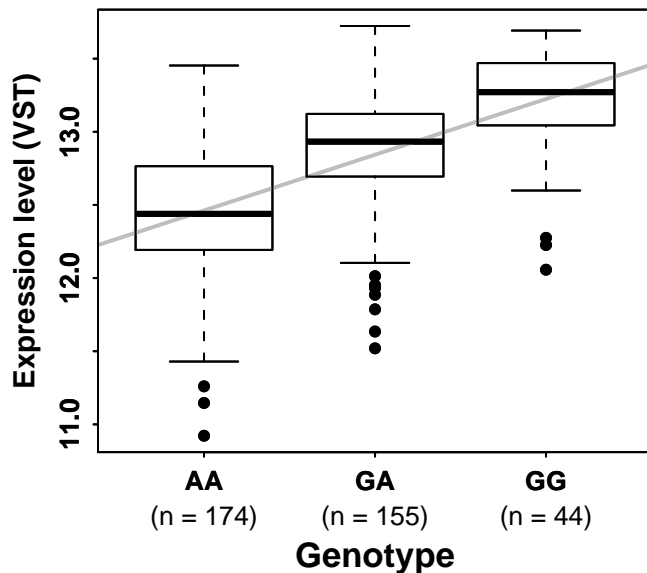

rs2843964 vs. ILMN\_1774949

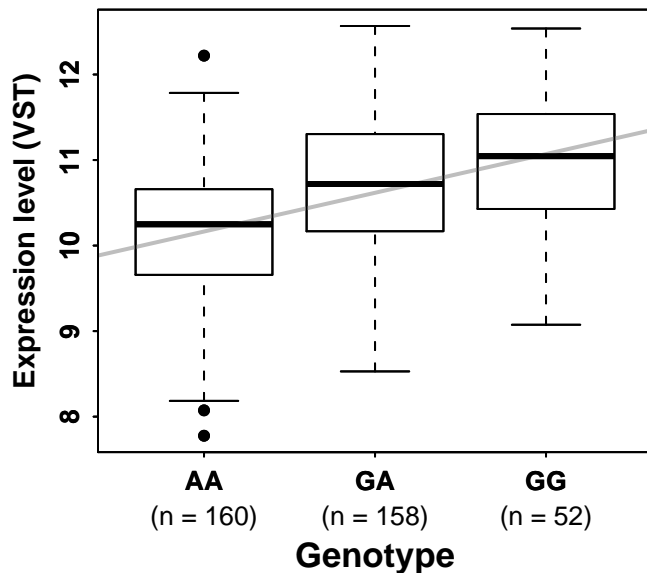

rs4822461 vs. ILMN\_1789418

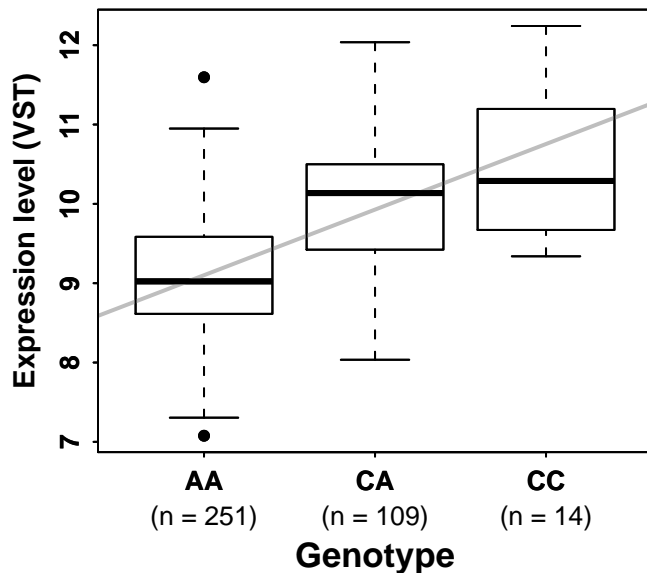

rs832582 vs. ILMN\_1757636

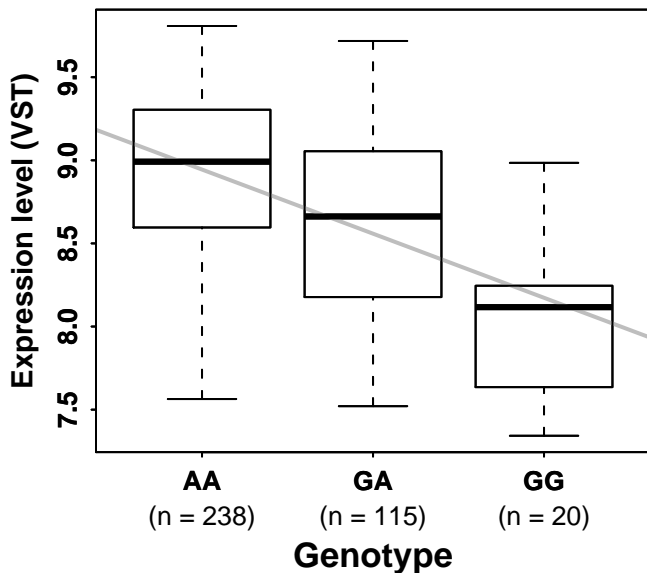

rs816931 vs. ILMN\_1767801

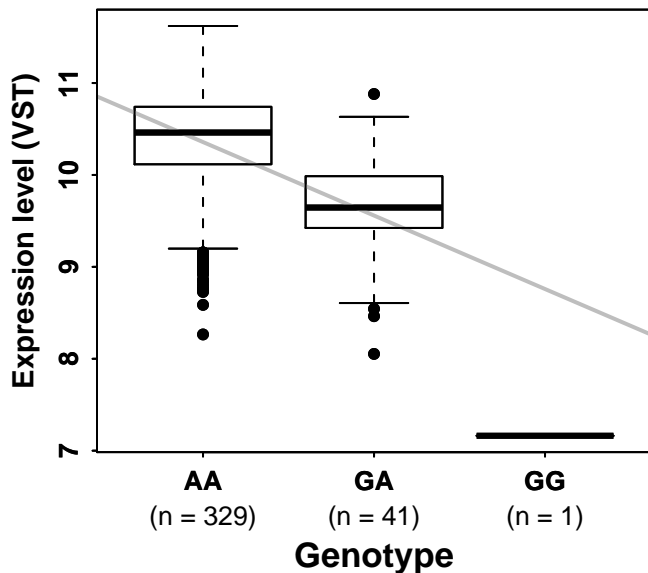

rs4813547 vs. ILMN\_1680015

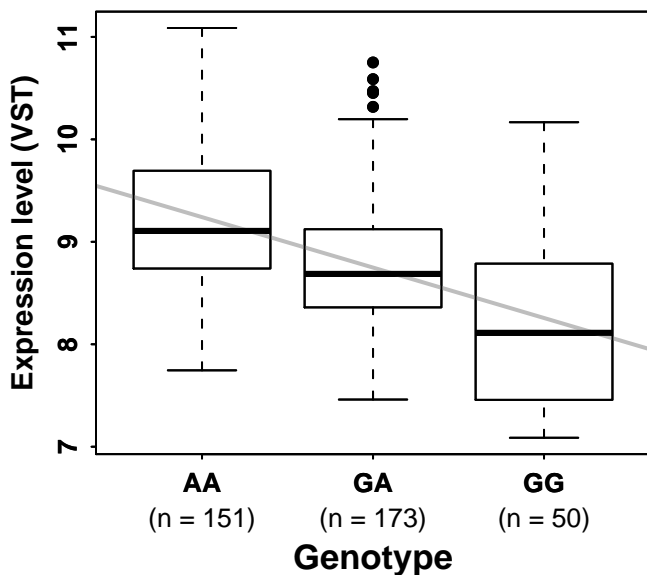

rs2838808 vs. ILMN\_2376667

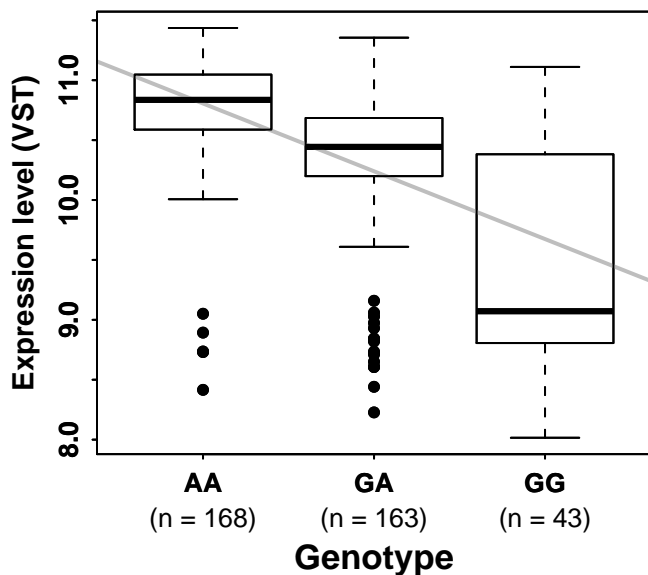



rs10402271 vs. ILMN\_2320280

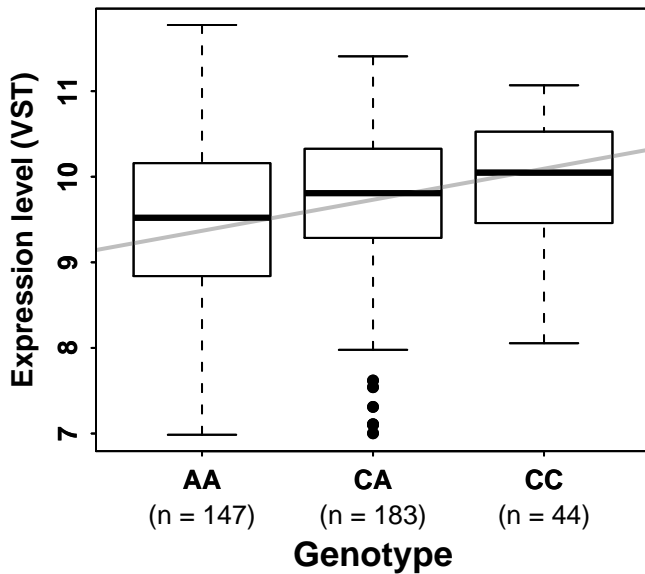

rs10402271 vs. ILMN\_2320280

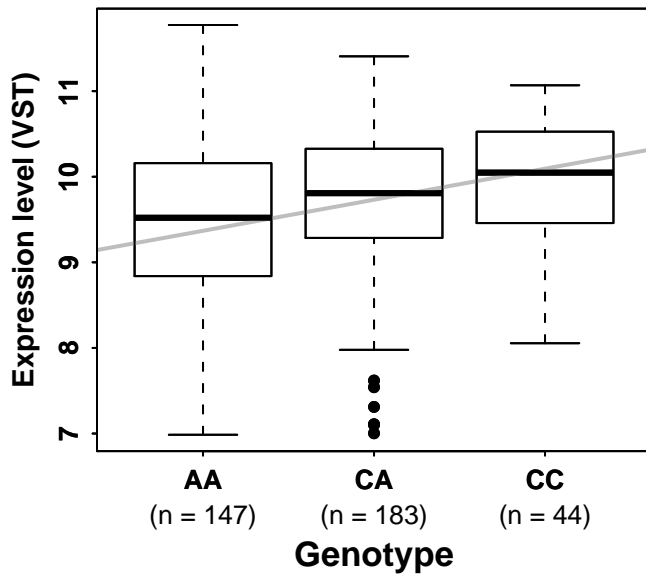

rs10402271 vs. ILMN\_2320280

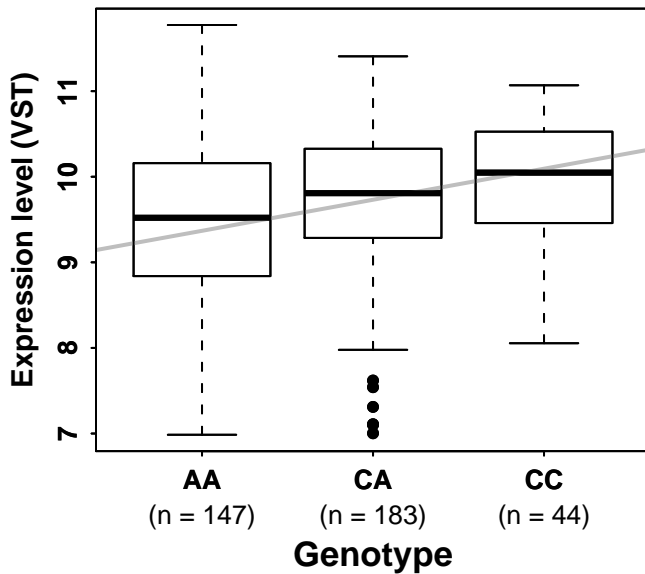

rs10929262 vs. ILMN\_2115862

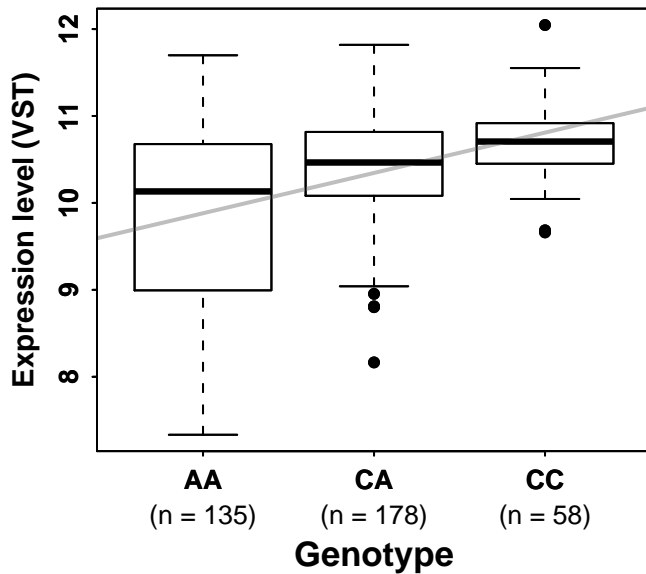

rs11677350 vs. ILMN\_1716041

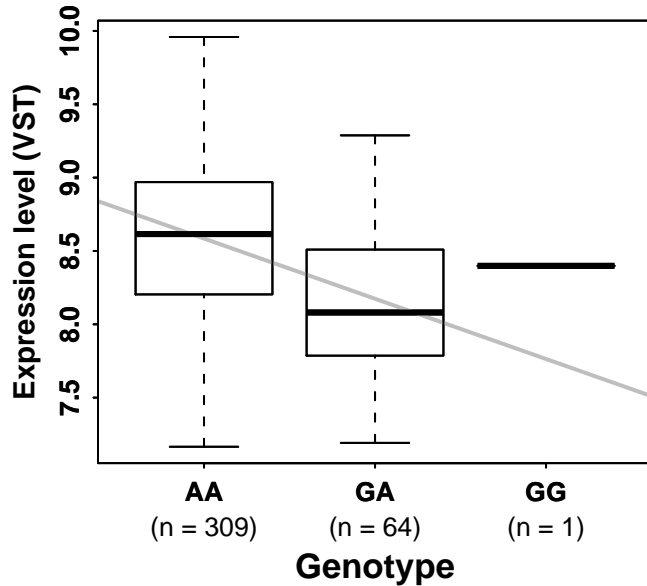

rs12883250 vs. ILMN\_2415572

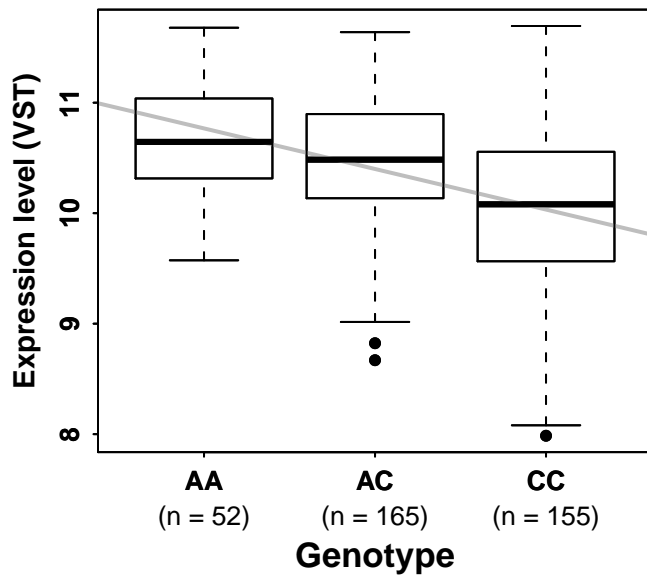

rs2395175 vs. ILMN\_2157441

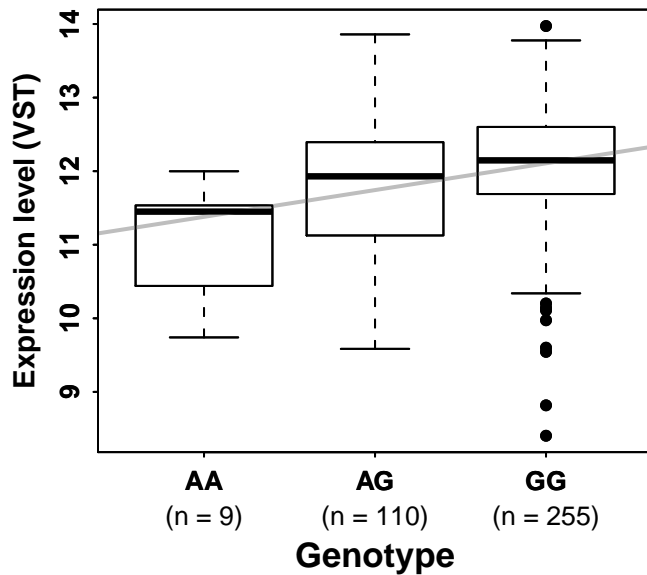

rs2729376 vs. ILMN\_1765332

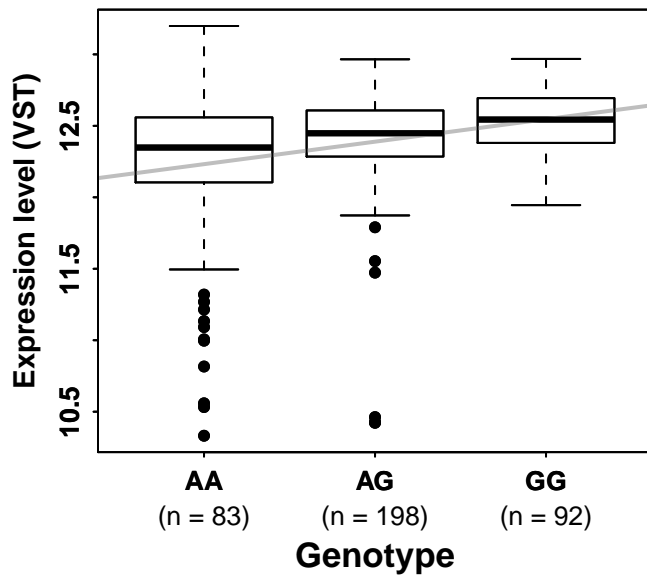

rs3759387 vs. ILMN\_1689156

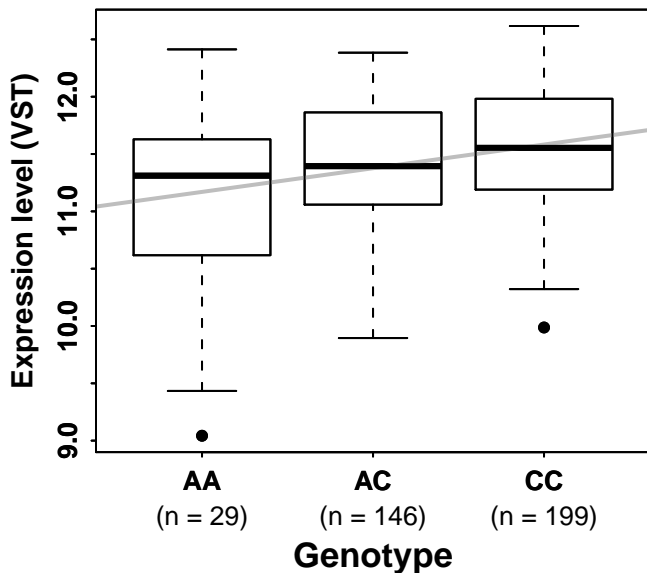

rs3800324 vs. ILMN\_1655748

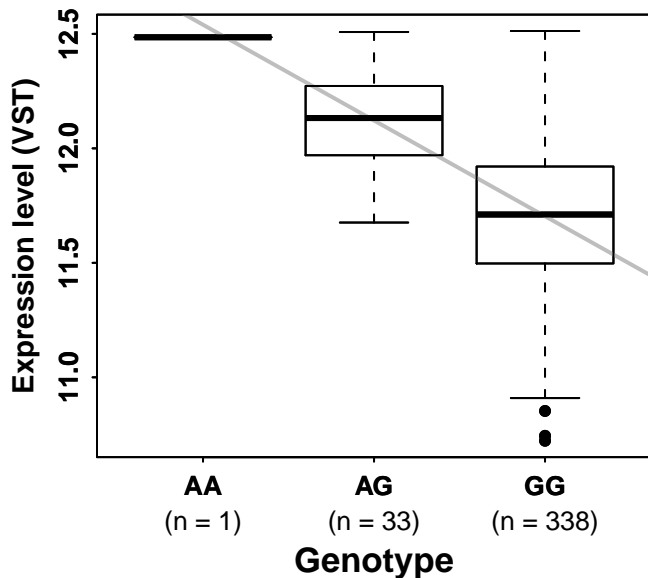

rs3800324 vs. ILMN\_2377991

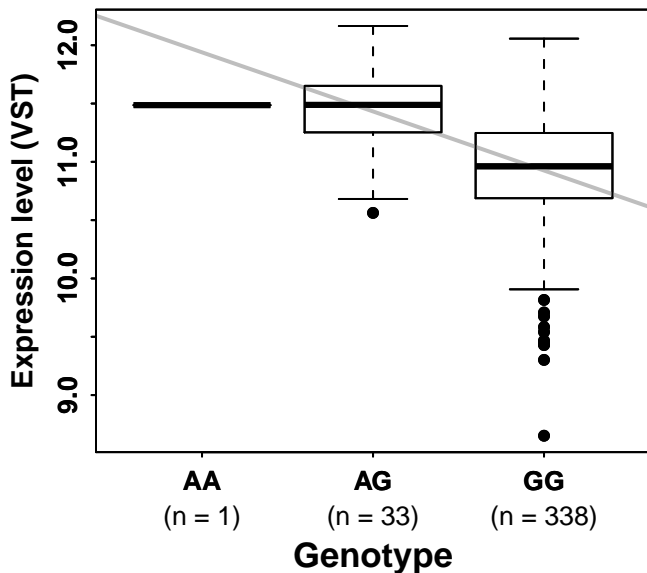

rs3923367 vs. ILMN\_1710315

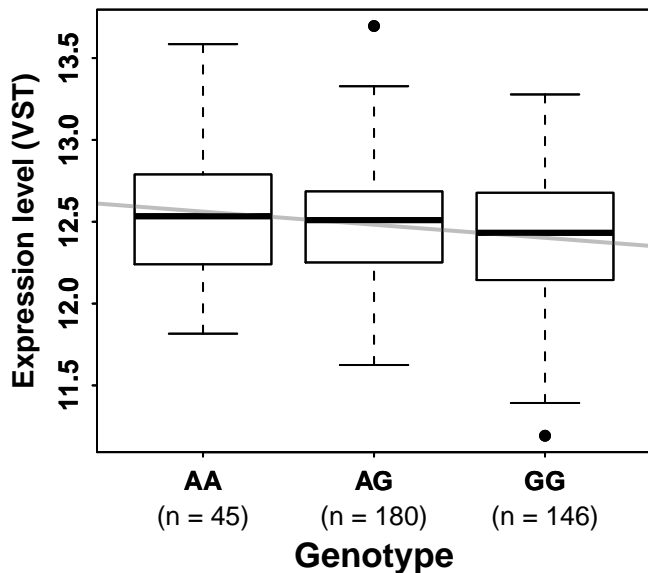

rs6733196 vs. ILMN\_1715203

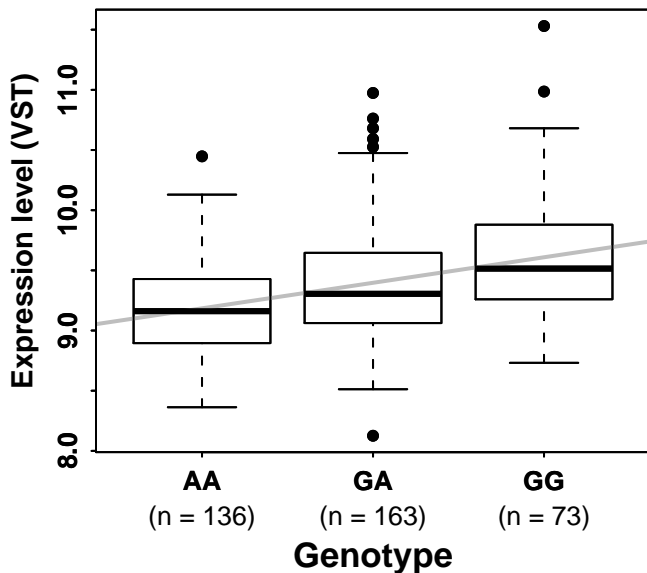

rs7002825 vs. ILMN\_1766770

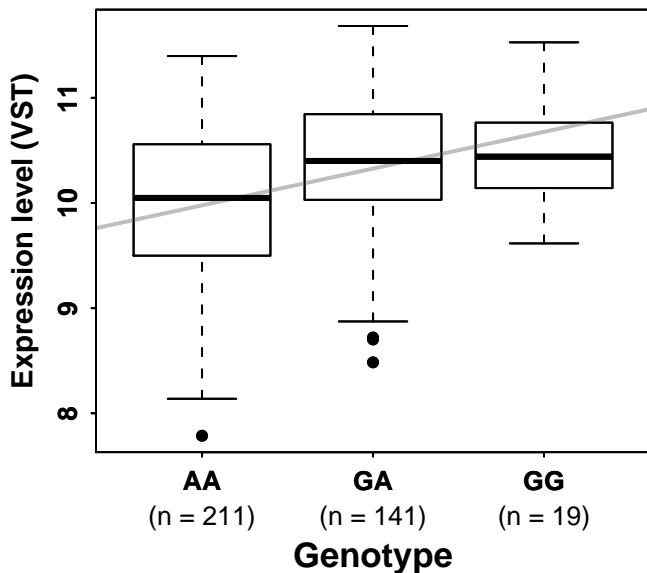

rs7254601 vs. ILMN\_1655637

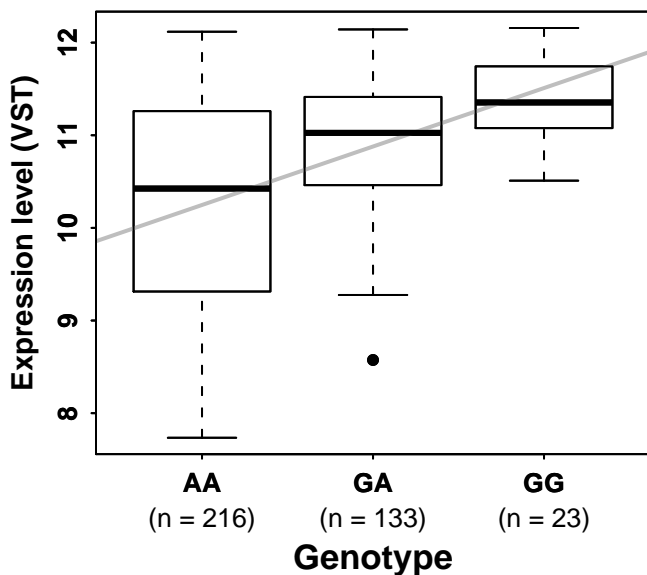

rs7416392 vs. ILMN\_1710315

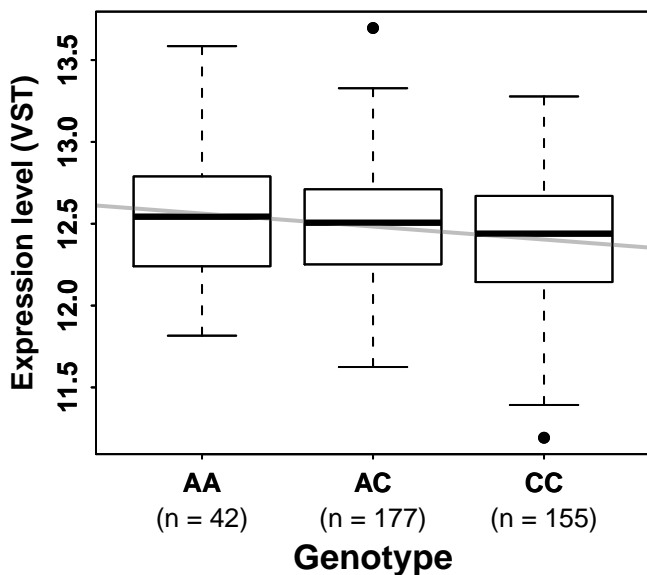

## rs7581626 vs. ILMN\_1715203

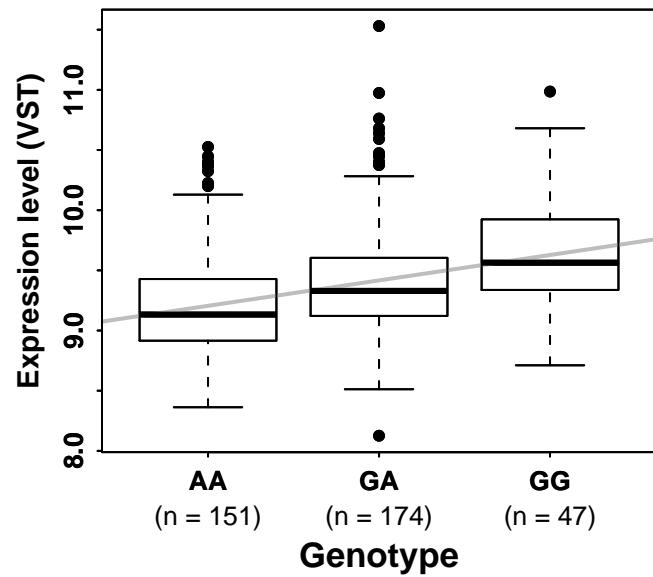

Supplement: pgen.1002707.s004.pdf [file pgen.1002707.s004.pdf]
