# Supplementary material for: Brain Expression Genome-Wide Association Study (eGWAS) Identifies Human Disease-Associated Variants
Source: PubMed Central journal article supplement (PMC3369937; doi:10.1371/journal.pgen.1002707), 2012-06-07

Supplementary\_Figure\_1a

Q-Q Plot

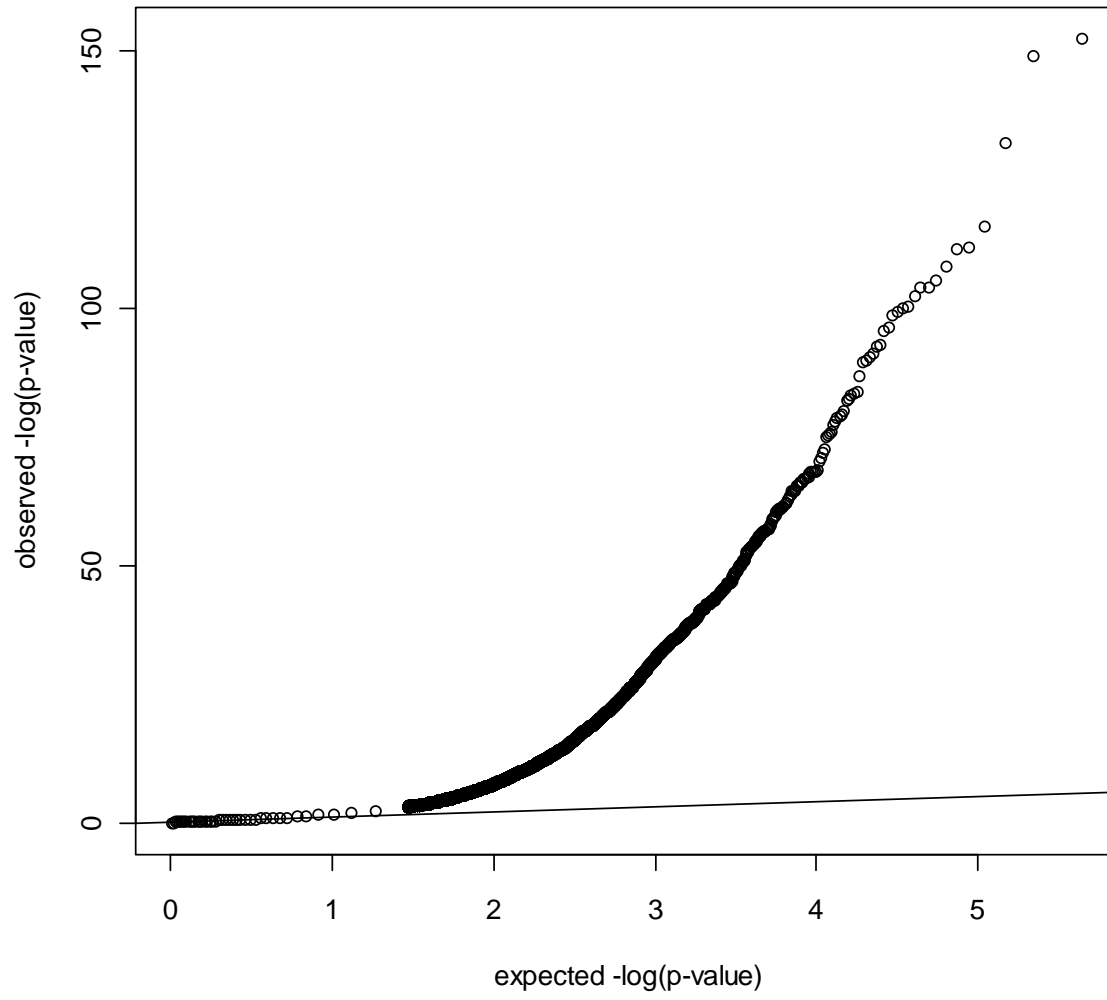

Lower Corner of Q-Q Plot

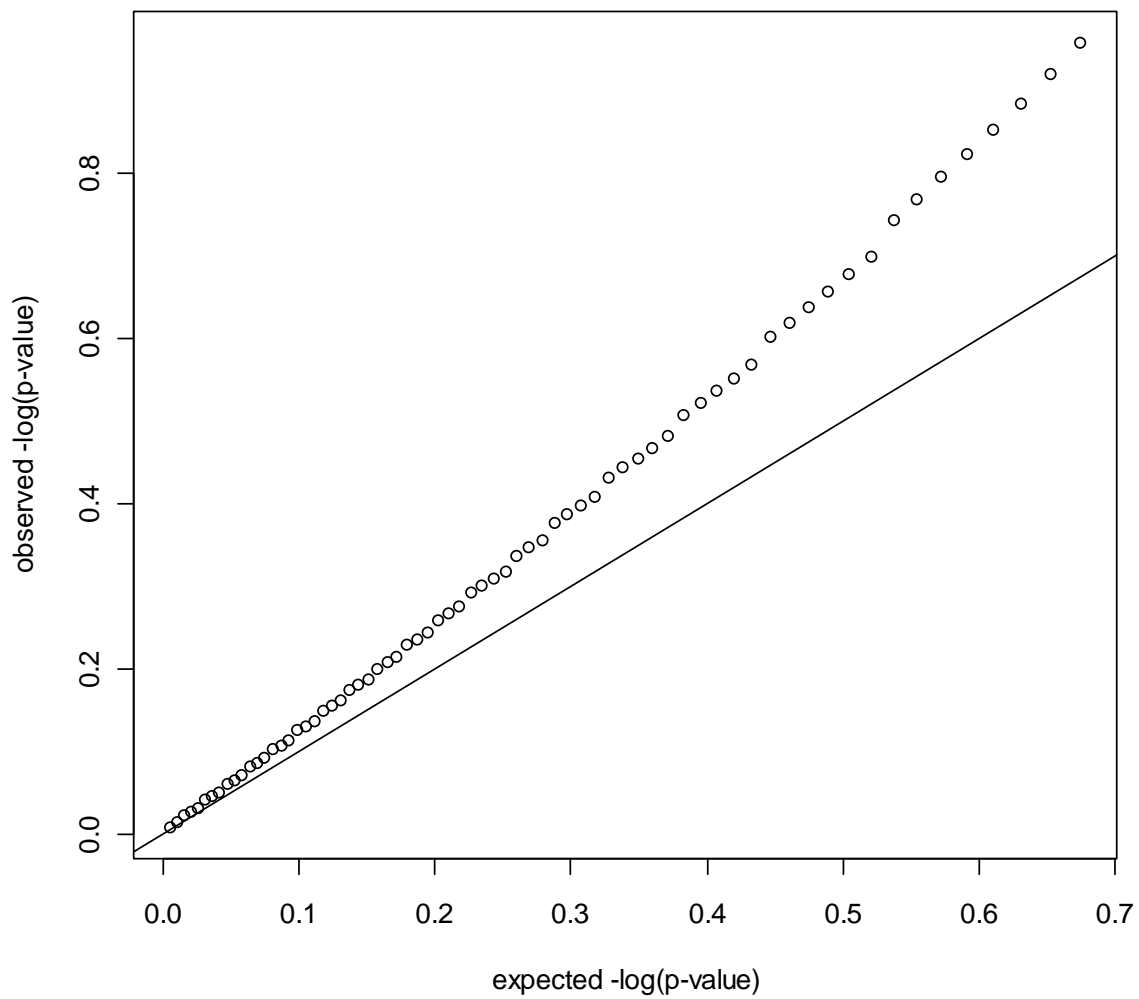

### Inflation Corrected Q-Q Plot

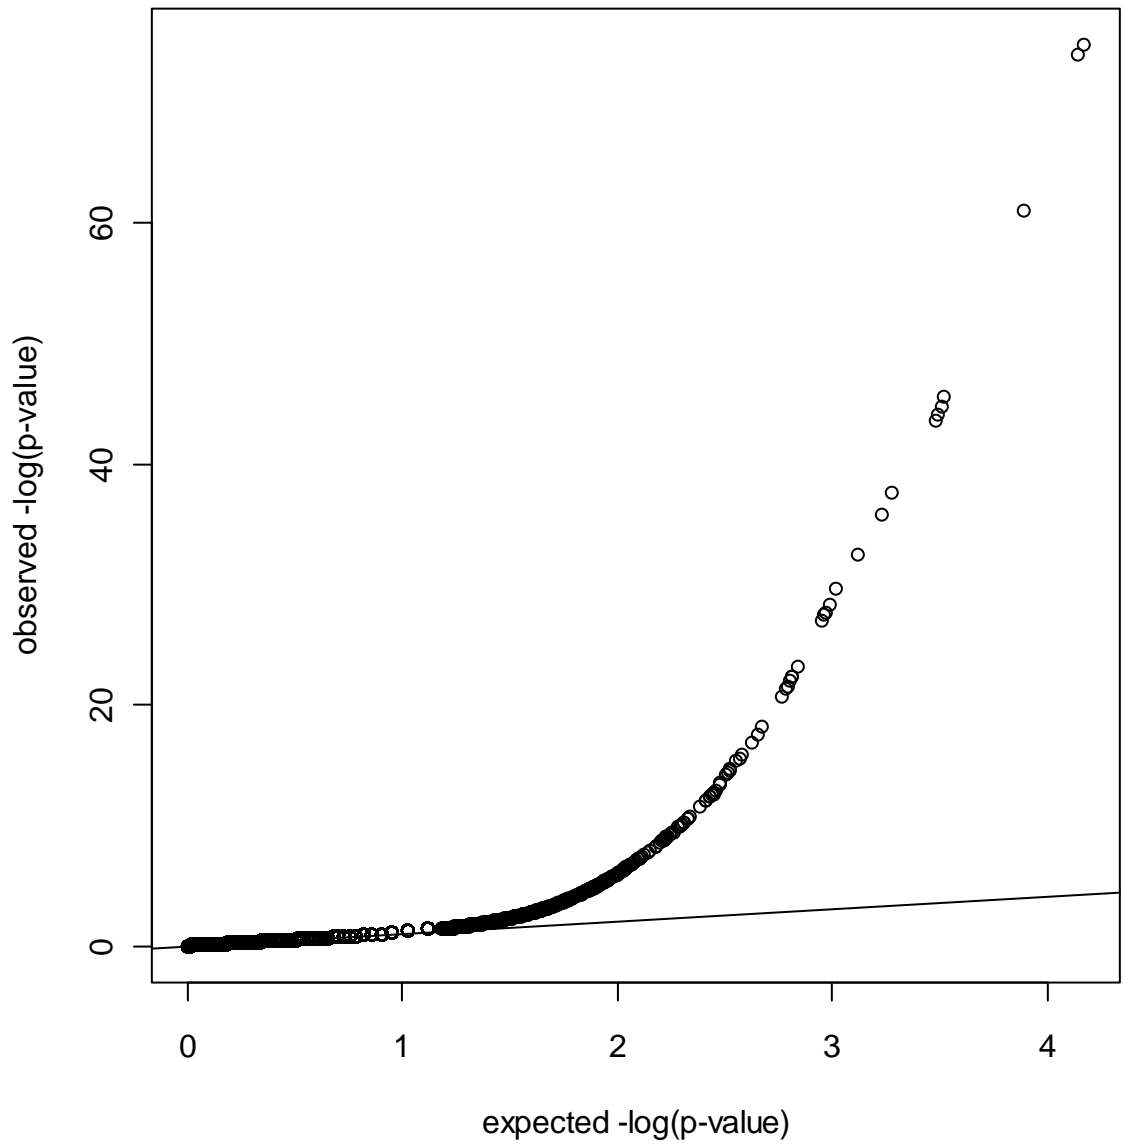

Lower Corner of Inflation Corrected Q-Q Plot

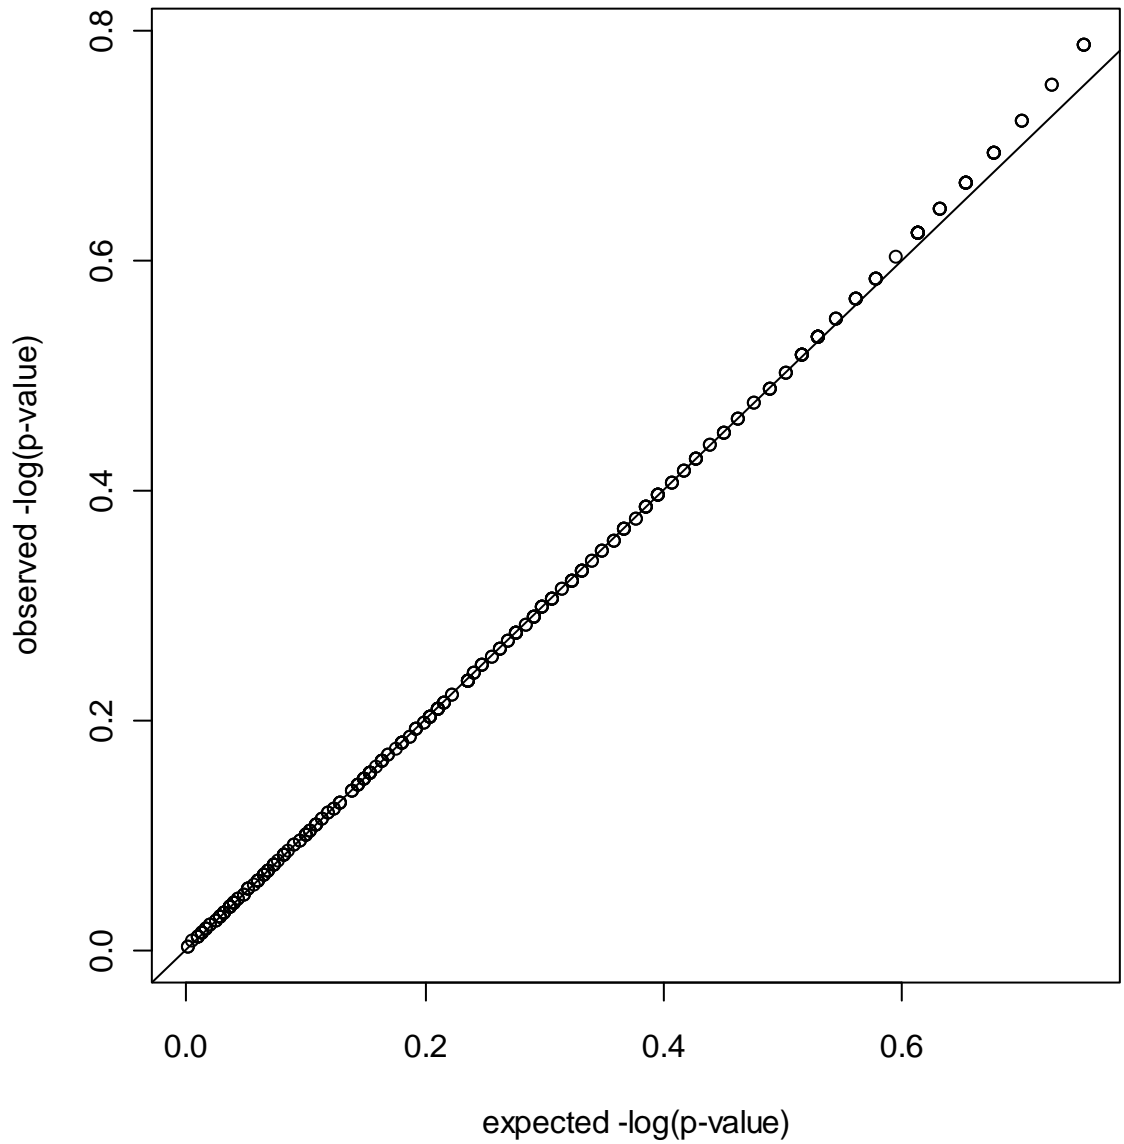

Supplement: pgen.1002707.s002.pdf [file pgen.1002707.s002.pdf]
