# Supplementary material for: Brain Expression Genome-Wide Association Study (eGWAS) Identifies Human Disease-Associated Variants
Source: PubMed Central journal article supplement (PMC3369937; doi:10.1371/journal.pgen.1002707), 2012-06-07

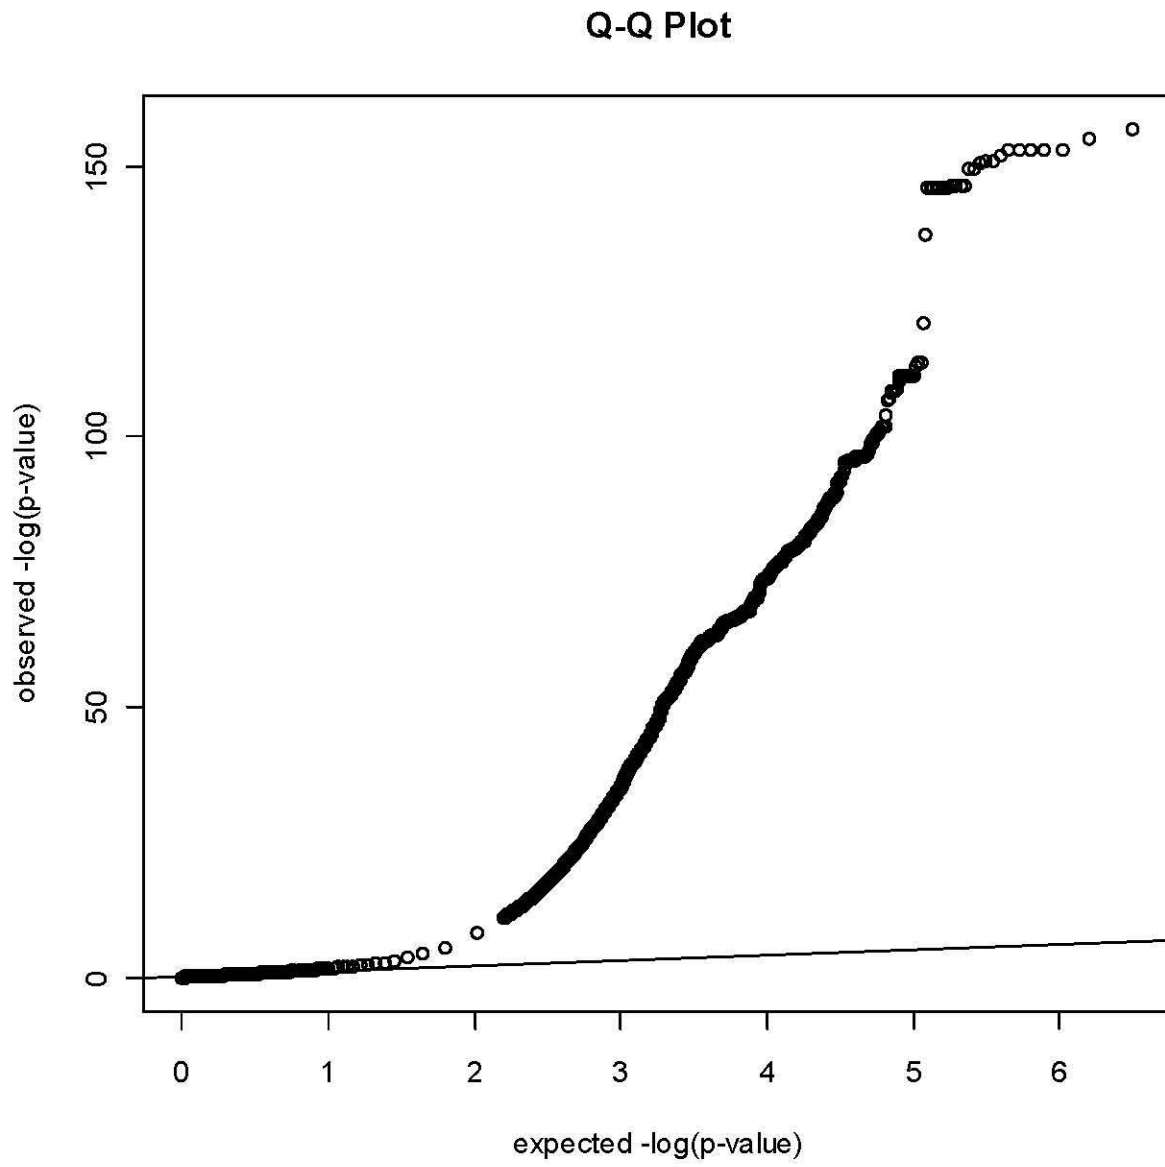

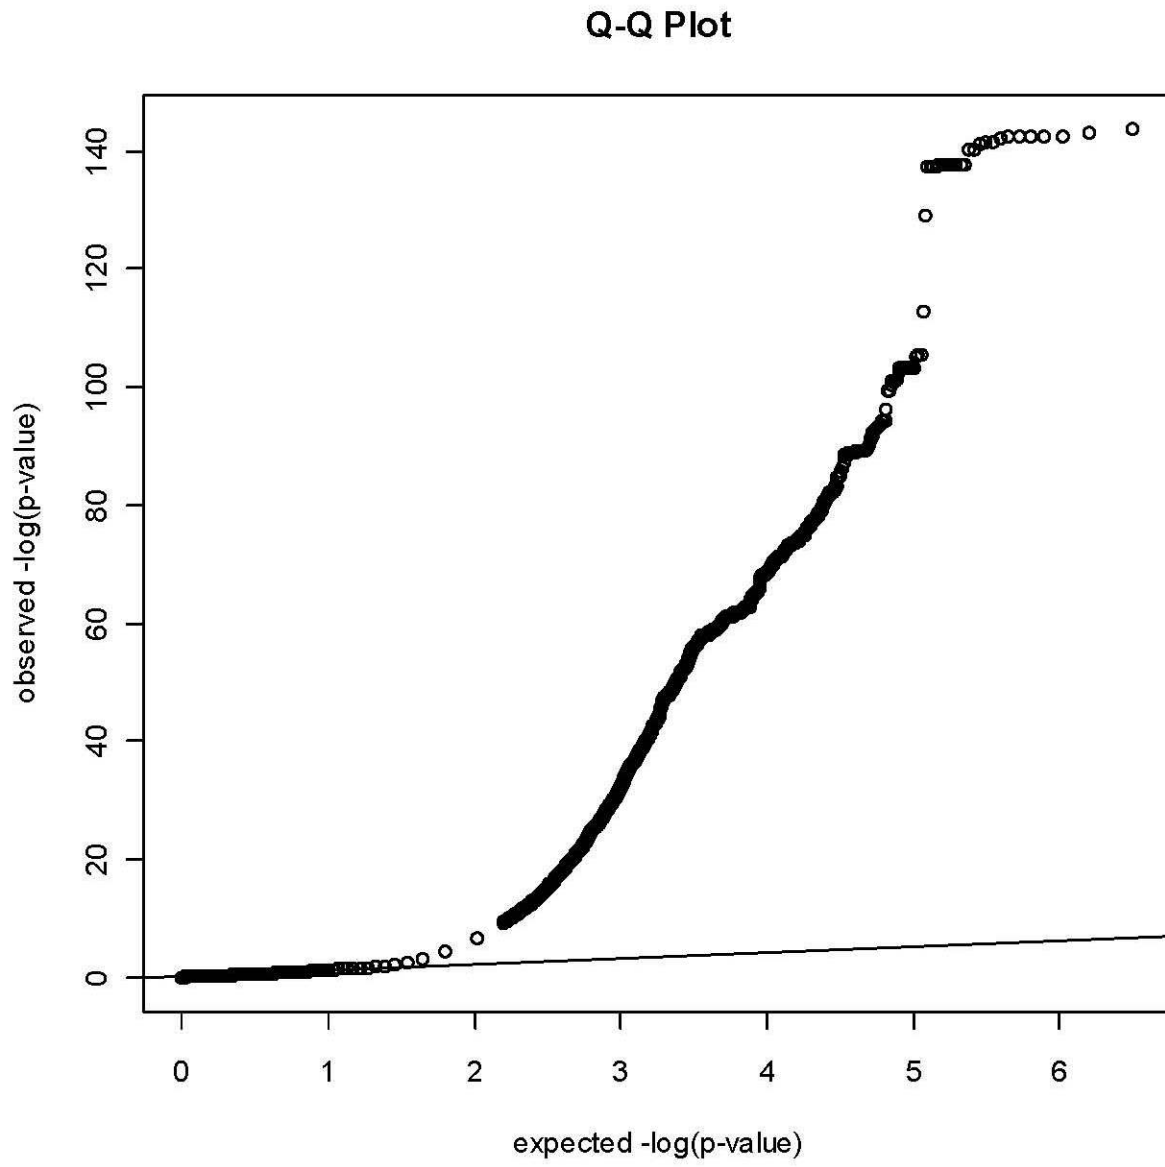

### Q-Q Plot

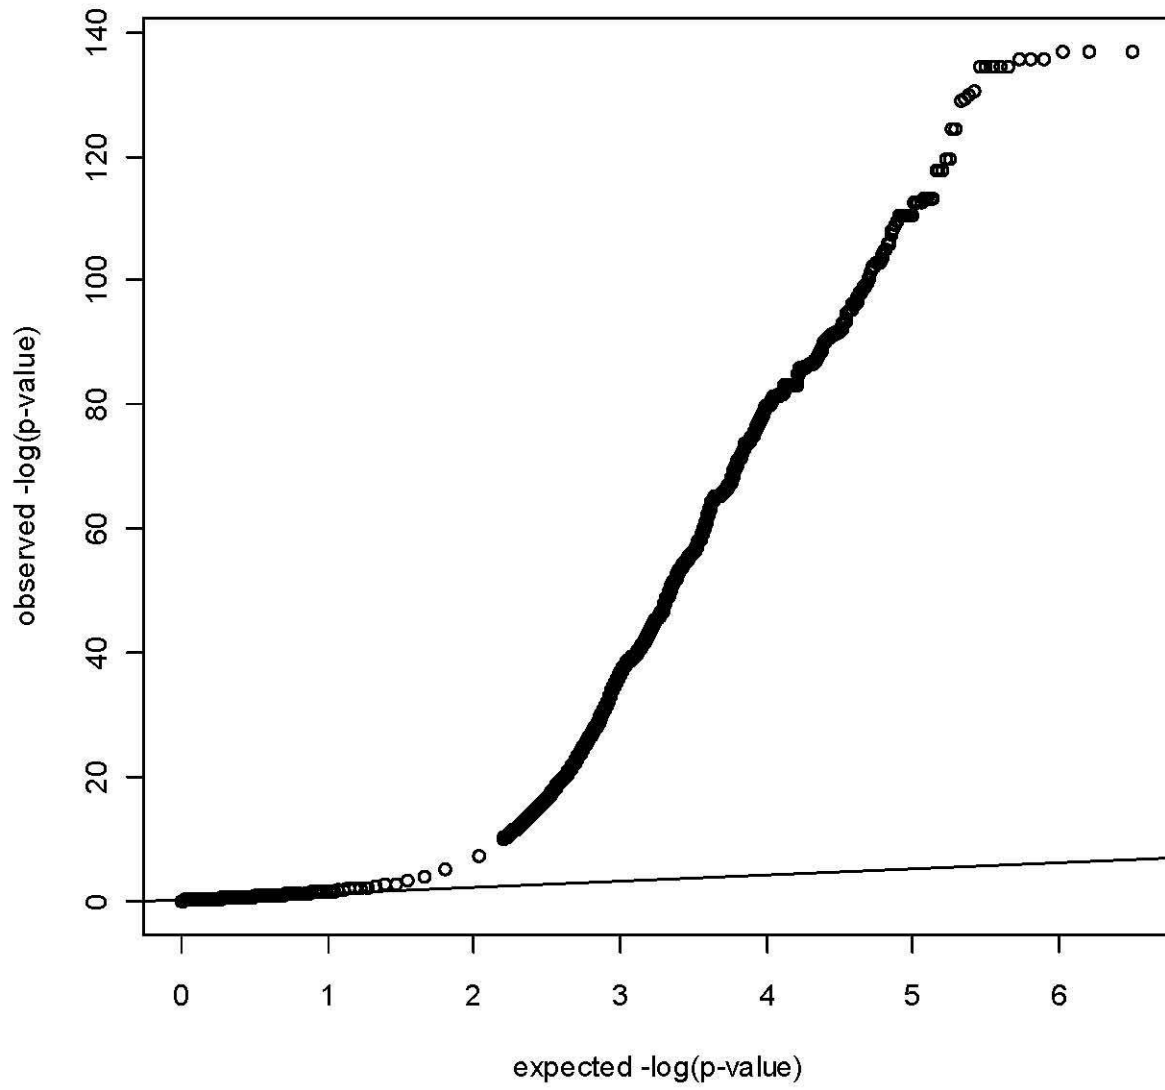

### Q-Q Plot

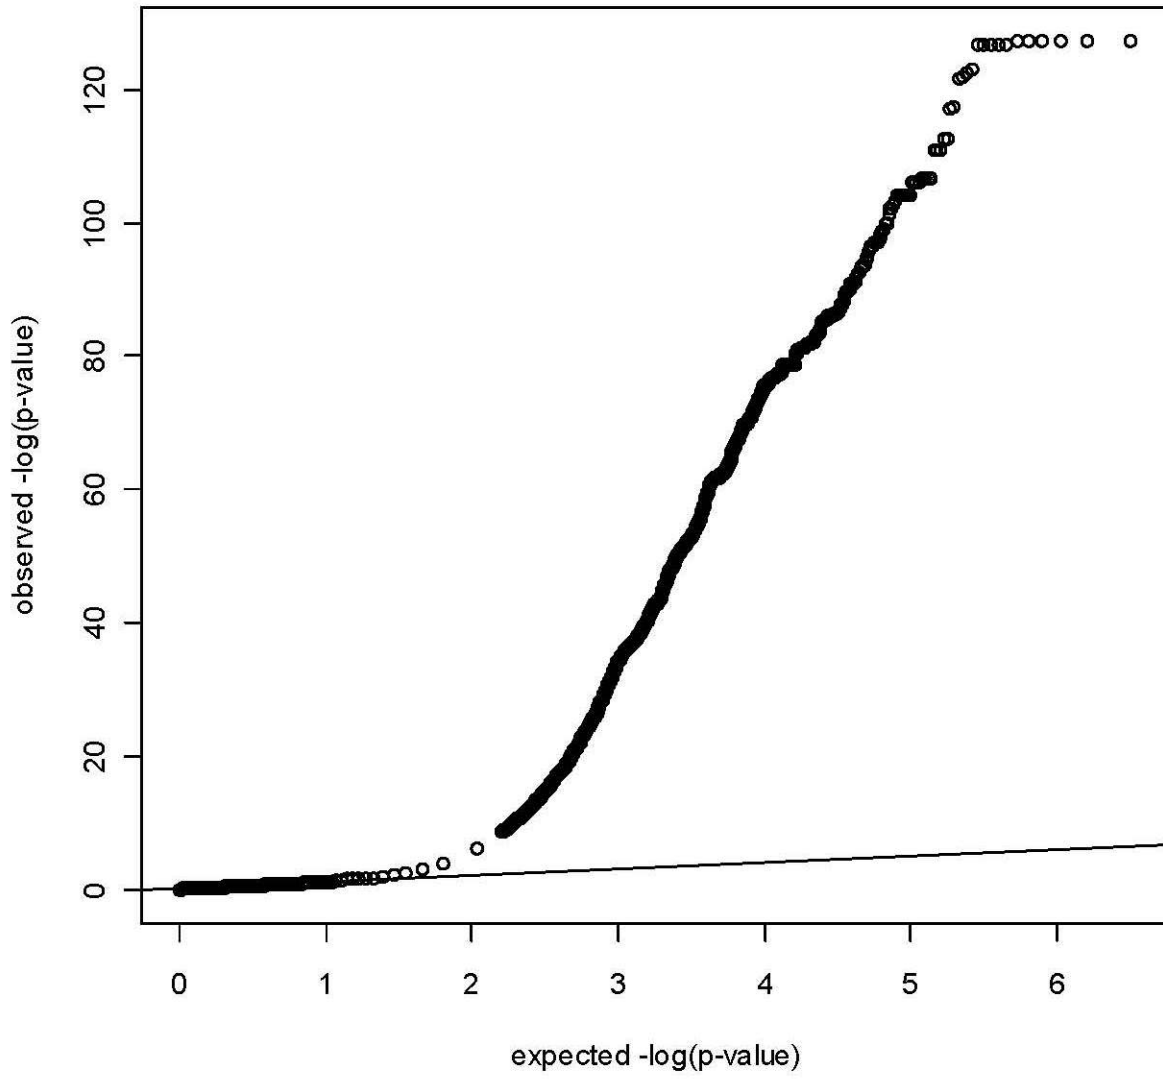

Supplement: pgen.1002707.s007.pdf [file pgen.1002707.s007.pdf]
